# Supplementary material for: A domino reaction strategy for facile and modular construction of synthetically challenging functionalized ortho-fluoroanilines
Source: Royal Society of Chemistry journal article supplement (doi:10.1039/d4qo01692k), 2024-01-01
Supplement: d4qo01692k1.pdf [file d4qo01692k1.pdf]

# Supporting Information

## A domino reaction strategy for facile and modular construction of synthetically challenging functionalized *ortho*-fluoroanilines

Benedikt W. Grau,<sup>[a]</sup> Sascha Kohlbauer,<sup>[a]</sup> Yungyeong Gu,<sup>[a]</sup> Friedrich Hahn,<sup>[b]</sup> Josephine Lösing,<sup>[b]</sup> Maximilian Stangier,<sup>[c]</sup> Lutz Ackermann,<sup>[c]</sup> Manfred Marschall,<sup>[b]</sup> and Svetlana B. Tsogoeva\*<sup>[a]</sup>

Correspondence to: [svetlana.tsogoeva@fau.de](mailto:svetlana.tsogoeva@fau.de)

- 
- [a] Dr. B. W. Grau, S. Kohlbauer, Y. Gu, Prof. Dr. S. B. Tsogoeva  
Organic Chemistry Chair I and Interdisciplinary Center for Molecular Materials (ICMM)  
Friedrich-Alexander-Universität Erlangen-Nürnberg  
Nikolaus Fiebiger-Straße 10, 91058 Erlangen, Germany  
E-mail: [svetlana.tsogoeva@fau.de](mailto:svetlana.tsogoeva@fau.de)
- [b] Dr. F. Hahn, J. Lösing, Prof. Dr. M. Marschall  
Institute for Clinical and Molecular Virology  
Friedrich-Alexander University of Erlangen-Nürnberg (FAU)  
Schlossgarten 4, 91054 Erlangen, Germany
- [c] Dr. M. Stangier, Prof. Dr. L. Ackermann  
Institut für Organische und Biomolekulare Chemie  
Georg-August-Universität Göttingen  
Tammannstraße 2, 37077 Göttingen, Germany
-

## Table of content

|                                                                         |     |
|-------------------------------------------------------------------------|-----|
| General information.....                                                | 3   |
| Optimization of a new domino reaction .....                             | 4   |
| Procedures for the synthesis of the starting materials .....            | 5   |
| General procedure towards diaryl-substituted fluoroanilines 3a-3j. .... | 6   |
| General procedure towards triaryl-substituted fluoroanilines 5a-n. .... | 7   |
| Characterization of diaryl-substituted fluoroanilines 3a-3j .....       | 8   |
| Characterization of triaryl-substituted fluoroanilines 5a-n.....        | 12  |
| Synthesis of quinazolines 9 and 10.....                                 | 65  |
| X-ray crystallography of 5n.....                                        | 95  |
| Biological Methodology .....                                            | 97  |
| UV/Vis Spectra.....                                                     | 98  |
| Cyclic voltammetry .....                                                | 101 |
| References .....                                                        | 102 |

## General information

All chemicals used for synthesis were purchased from commercial sources and were used without further purification. All solvents were purified by distillation under aerobic conditions or were purchased in HPLC-grade-quality. All products were dried in high vacuum (up to  $10^{-3}$  mbar). Thin layer chromatography (TLC) was performed on pre-coated aluminum sheets ALUGRAM® SIL G/UV254 (0.2 mm silica gel with fluorescent indicator, MachereyNagel & Co).  $^1\text{H}$ -NMR ( $^{13}\text{C}$ -NMR) spectra were recorded at room temperature on a Bruker Avance 300, 400, 500 or 600 spectrometers operating at 300 MHz, 400 MHz, 500MHz or 600MHz. All chemical shifts are given in the ppm-scale and refer to the non-deuterized proportion of the solvent.  $^{13}\text{C}$ -NMRs were measured with  $^1\text{H}$  and  $^{19}\text{F}$  decoupling to increase the visibility of the signals if they were measured with 126 MHz. In the case of 151 MHz measurements, the multiplicity of  $^{13}\text{C}$  signals is given, indicating coupling with fluorine. The title on the right side can identify decoupled spectra. ESI, APPI, and MALDI mass spectra were recorded on a Bruker Daltonik maXis 4G, a Bruker Daltonik micrOTOF II focus, and a Bruker Daltonik ultraflexTOF/TOF. IR spectra were recorded on a Varian IR-660 apparatus. The absorption is indicated in wave numbers [ $\text{cm}^{-1}$ ]. X-ray crystallography was performed on a SuperNova, Dual, Cu at zero, Atlas diffractometer.

## Optimization of a new domino reaction

**Table S1:** Optimization of *m*-terphenyl domino reaction.

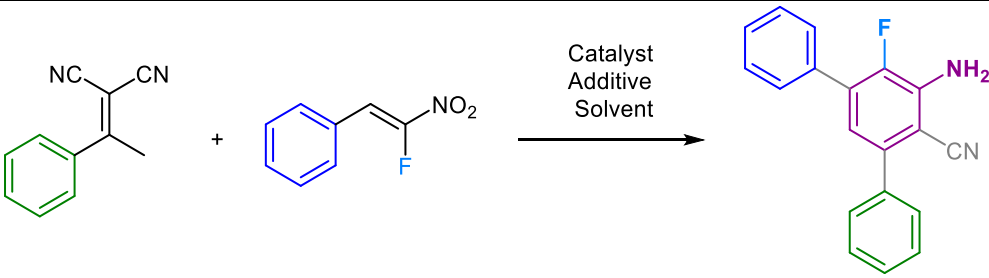

| Entry             | Cat                       | Amount Cat [mol%] | Solvent                         | Temperature [°C] | Time | Yield               |
|-------------------|---------------------------|-------------------|---------------------------------|------------------|------|---------------------|
| 1                 | DABCO                     | 100               | CH <sub>3</sub> CN              | 50               | o.n. | 32%                 |
| 2                 | Cu(OTf) <sub>2</sub> /TEA | 5                 | CH <sub>3</sub> CN              | 50 → 70          | 2d   | n.c. <sup>[a]</sup> |
| 3                 | DABCO                     | 100               | DMSO                            | 50               | 3d   | 12%                 |
| 4                 | DABCO                     | 100               | THF                             | 50               | 4d   | >10%                |
| 5                 | DABCO                     | 100               | EtOH                            | 50               | 3d   | 20%                 |
| 6                 | DABCO                     | 100               | H <sub>2</sub> O                | 50               | 1d   | 15%                 |
| 7                 | DABCO                     | 100               | CH <sub>2</sub> Cl <sub>2</sub> | 50               | 3d   | 27%                 |
| 8                 | DABCO                     | 100               | Toluene                         | 50               | 4d   | 16%                 |
| 9                 | DABCO                     | 100               | CH <sub>3</sub> CN              | r.t.             | 1d   | 18%                 |
| 10                | DABCO                     | 100               | CH <sub>3</sub> CN              | 70               | 1d   | 18%                 |
| 11                | DBU                       | 100               | CH <sub>3</sub> CN              | 50               | 1d   | 48%                 |
| 12                | DIPEA                     | 100               | CH <sub>3</sub> CN              | 50               | 2d   | 22%                 |
| 13                | DMAP                      | 100               | CH <sub>3</sub> CN              | 50               | 2d   | 28%                 |
| 14                | Pyridine                  | 100               | CH <sub>3</sub> CN              | 50               | 1d   | n.c. <sup>[a]</sup> |
| 15                | TEA                       | 100               | CH <sub>3</sub> CN              | 50               | 2d   | 37%                 |
| 16                | DBU                       | 20                | CH <sub>3</sub> CN              | 50               | 5d   | >5%                 |
| 17                | DBU                       | 50                | CH <sub>3</sub> CN              | 50               | 2d   | 43%                 |
| 18                | DBU                       | 200               | CH <sub>3</sub> CN              | 50               | 1d   | 43%                 |
| 19                | DBU/ Schreiner's Catalyst | 100 / 25          | CH <sub>3</sub> CN              | 50               | 1d   | 69%                 |
| 20                | DBU/CuBr <sub>2</sub>     | 1.00 / 25         | CH <sub>3</sub> CN              | 50               | 1d   | 13%                 |
| 21                | DBU/FeCl <sub>3</sub>     | 100 / 25          | CH <sub>3</sub> CN              | 50               | 1d   | 6%                  |
| 22                | DBU/TiCl <sub>4</sub>     | 100 / 25          | CH <sub>3</sub> CN              | 50               | 1d   | n.c. <sup>[a]</sup> |
| 23                | DBU/ Schreiner's Catalyst | 100 / 25          | CH <sub>3</sub> CN              | 50               | 1d   | 59%                 |
| 24 <sup>[b]</sup> | DBU/ Schreiner's Catalyst | 100 / 25          | CH <sub>3</sub> CN              | 50               | 1d   | 57%                 |
| 25 <sup>[c]</sup> | DBU/ Schreiner's Catalyst | 100 / 25          | CH <sub>3</sub> CN              | 50               | 1d   | 64%                 |
| 26                | DBU/ Schreiner's Catalyst | 100 / 25          | CH <sub>3</sub> CN              | 50               | 1d   | 62%                 |
| 27                | DBU/PPh <sub>3</sub>      | 100 / 25          | CH <sub>3</sub> CN              | 50               | 1d   | 40%                 |
| 28                | DBU/Thiourea              | 100 / 25          | CH <sub>3</sub> CN              | 50               | 1d   | 61%                 |

Starting material in 2 mL solvent and heated to given T, °C.

<sup>[a]</sup> n.c.: no conversion observed.

<sup>[b]</sup> 1.2 equivalents of nitrostyrene were used.

<sup>[c]</sup> 1.2 equivalents of  $\alpha,\alpha$ -dicyanoolefin were used.

## Procedures for the synthesis of the starting materials

Fluoronitrostyrenes **2a-e** were synthesized according to literature procedure.<sup>[4d]</sup>

Benzophenones were either bought with >95% purity or synthesized *via* Friedel-Craft acylation:

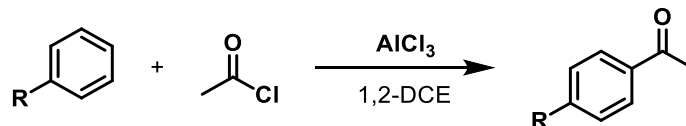

In a two-neck flask, 1,2-DCE ( $c[1,2\text{-DCE}] = 0.50 \text{ ml/mmol}$ ) was mixed with finely powdered AlCl<sub>3</sub> (1.20 equiv.) and acetyl chloride (1.05 equiv.) was added while stirring and cooling with ice water. The benzene derivative (1.00 equiv.) was added dropwise, and the mixture was stirred for 1 h. After removing the ice bath, the flask kept stirring overnight. To decompose the ketone-aluminium chloride complex, the mixture was carefully poured into chilled water ( $c[\text{water}] = 5.00 \text{ ml/mmol}$ ) and aluminium hydroxide that may have precipitated was brought into the solution with few drops of conc. HCl. The organic layer was separated, and the aqueous phase was extracted twice with DCM. The combined extracts were carefully washed with water, 2 % NaOH solution and again with water. After drying over K<sub>2</sub>CO<sub>3</sub>, the solvent was evaporated under reduced pressure to obtain the desired product in sufficient purity.

### 1-(4-fluorophenyl)ethan-1-one

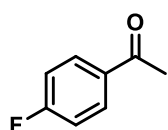

<sup>1</sup>H-NMR (300 MHz, Chloroform-*d*):  $\delta = 8.01\text{--}7.96$  (m, 2H),  $7.16\text{--}7.10$  (m, 2H),  $2.59$  (s, 3H) ppm.

<sup>19</sup>F-NMR (282MHz, Chloroform-*d*):  $\delta = -105.33$  ppm.

The recorded NMR data was consistent with the literature.<sup>[34a]</sup>

### 1-(4-methoxyphenyl)ethan-1-one

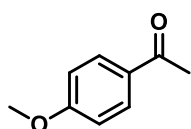

<sup>1</sup>H-NMR (300 MHz, Chloroform-*d*):  $\delta = 7.99\text{--}7.87$  (m, 2H),  $6.98\text{--}6.87$  (m, 2H),  $3.87$  (s, 3H),  $2.55$  (s, 3H) ppm.

The recorded NMR data was consistent with the literature.<sup>[34a]</sup>

Knoevenagel condensation of benzophenones towards **1a-e** was adapted from literature procedure.<sup>[34b]</sup>

Synthesis of deoxy-benzoin and  $\alpha,\alpha$ -dicyanoolefins **4a-i** were adapted from literature procedure.<sup>[23c]</sup>

## General procedure towards diaryl-substituted fluoroanilines 3a-3j.

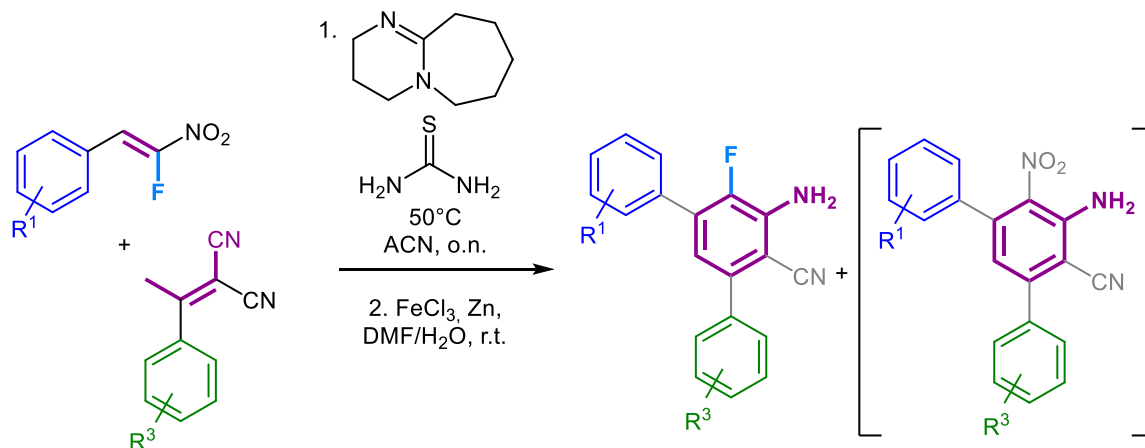

To a solution of  $\alpha,\alpha$ -dicyanoolefin (200  $\mu\text{mol}$ ), fluoro-nitrostyrene (200  $\mu\text{mol}$ ) and thiourea (50  $\mu\text{mol}$ ) in 2 ml acetonitrile DBU (200  $\mu\text{mol}$ ) was added. The yellowish reaction mixture was heated to 50 °C and was allowed to stir overnight. The resulting brownish solution was concentrated under reduced pressure and purified by column chromatography (*iso*-Hexane : DCM : Et<sub>2</sub>O = 8 : 3 : 1) to obtain the desired *m*-terphenyl (10 : 1.2 mixture with nitro-derivative). The product can be identified as a strong blueish fluorescent spot ( $R_f = 0.5$ ), with the yellow spot of the nitro-derivative at the same position.

To a suspension of domino-mixture (1 equiv.) in DMF/H<sub>2</sub>O (7 ml/ 2 ml), FeCl<sub>3</sub> (0.8 equiv.) and Zn (20.0 equiv.) were added. After stirring at room temperature for 3.5 h, complete conversion of the nitro-derivatives to amine-derivatives was indicated by TLC as evanishment of the yellow spot. The mixture was filtered. The filter cake was washed with DCM and 20 ml of water was added to the filtrate. The filtrate was extracted with 8 ml DCM four times. The combined organic phases were washed with saturated ammonium chloride solution and water. After drying over MgSO<sub>4</sub> and evaporation of the solvent under reduced pressure, column chromatography (Hexane : DCM : Et<sub>2</sub>O = 8 : 3 : 1, blue fluorescent spot) gave the pure fluoro-substituted *m*-terphenyls.

## General procedure towards triaryl-substituted fluoroanilines 5a-n.

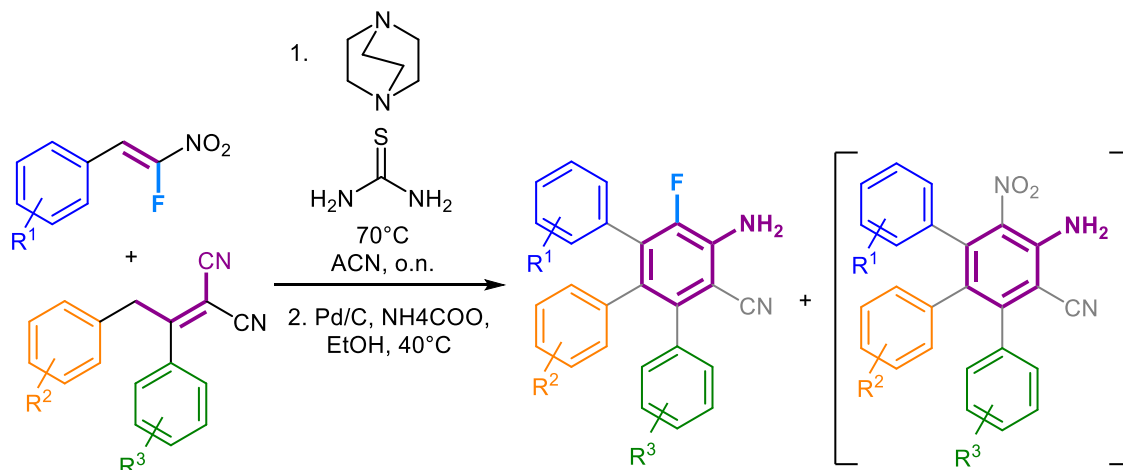

To a mixture of  $\alpha,\alpha$ -dicyanoolefin (200  $\mu\text{mol}$ ), nitrostyrene (200  $\mu\text{mol}$ ) and thiourea (100  $\mu\text{mol}$ ) in 2.5 ml acetonitrile DABCO (200  $\mu\text{mol}$ ) was added in one portion and the reaction was heated to 70 °C overnight. The yellowish reaction mixture turned brown. After 18 h the reaction was checked to see if TLC indicated the complete consumption of the starting material. The reaction mixture was allowed to cool down to room temperature, concentrated under reduced pressure and purified *via* a short plug (Hexane : EtOAc = 10 : 1 or Hexane : DCM : Et<sub>2</sub>O = 8 : 3 : 1) to yield the product and the corresponding nitro derivate as an inseparable mixture (yellow fluorescent spot,  $R_f = 0.40$ ). The dry mixture was dissolved in 15 ml degassed EtOH, Pd/C (15 mg) and ammoniumformate (150 mg) was added, and the reaction was heated to 40 °C. After TLC indicated the consumption of the nitro derivative (0.5-24 h, absence of yellow spot, new fluorescent spot around  $R_f = 0.15$ ) the solvent was evaporated, dissolved in DCM, filtered, and adsorbed on silica. The crude mixture was purified *via* column chromatography, using the same eluent as above, to obtain the pure fluor-derivatives.

## Characterization of diaryl-substituted fluoroanilines 3a-3j

### 5'-amino-6'-fluoro-[1,1':3',1''-terphenyl]-4'-carbonitrile 3a

29.2 mg, 101  $\mu\text{mol}$ , 51% yield

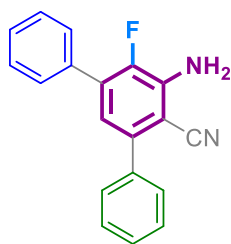

$\text{C}_{19}\text{H}_{13}\text{FN}_2$   
MW: 288.33

$^1\text{H}$  NMR (500 MHz, Chloroform-*d*)  $\delta$  = 7.63 – 7.53 (m, 4H), 7.53 – 7.37 (m, 6H), 6.84 (d,  $J$  = 6.8 Hz, 1H), 4.69 (s, 2H).

$^{13}\text{C}$  NMR (126 MHz, Chloroform-*d*)  $\delta$  = 146.93, 141.15, 140.22, 138.27, 134.51, 132.83, 129.03, 128.86, 128.80, 128.77, 128.72, 128.69, 119.77, 116.59, 95.98.

$^{19}\text{F}$  NMR (283 MHz, Chloroform-*d*)  $\delta$  = -140.61 (d,  $J$  = 7.0 Hz).

HR-MS (APPI positive mode):  $m/z$  = calc. for ( $[\text{M}]^+$ ): 288.1057, found: 288.1061.

### 5'-amino-6'-fluoro-4-methyl-[1,1':3',1''-terphenyl]-4'-carbonitrile 3b

26.9 mg, 89.0  $\mu\text{mol}$ , 44% yield

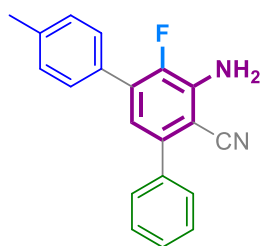

$\text{C}_{20}\text{H}_{15}\text{FN}_2$   
MW: 302.35

$^1\text{H}$  NMR (500 MHz, Chloroform-*d*)  $\delta$  = 7.62 – 7.54 (m, 2H), 7.53 – 7.39 (m, 5H), 7.28 (d,  $J$  = 7.7 Hz, 2H), 6.83 (d,  $J$  = 6.8 Hz, 1H), 4.67 (s, 2H), 2.42 (s, 3H).

$^{13}\text{C}$  NMR (126 MHz, Chloroform-*d*)  $\delta$  = 146.97, 141.10, 140.20, 138.95, 138.36, 132.84, 131.57, 129.51, 128.91, 128.80, 128.70, 128.69, 119.72, 116.66, 95.73, 21.42.

$^{19}\text{F}$  NMR (283 MHz, Chloroform-*d*)  $\delta$  = -140.66 (d,  $J$  = 6.5 Hz).

HR-MS (APPI positive mode):  $m/z$  = calc. for ( $[\text{M}]^+$ ): 302.1214, found: 302.1215.

### 5'-amino-6'-fluoro-4-methoxy-[1,1':3',1''-terphenyl]-4'-carbonitrile 3c

17.4 mg, 54.7  $\mu\text{mol}$ , 27% yield

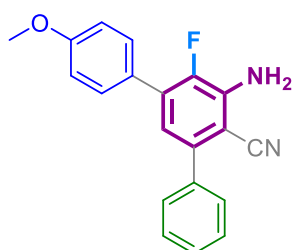

$\text{C}_{20}\text{H}_{15}\text{FN}_2\text{O}$   
MW: 318.35

$^1\text{H}$  NMR (500 MHz, Chloroform-*d*)  $\delta$  = 7.61 – 7.50 (m, 4H), 7.51 – 7.38 (m, 3H), 7.08 – 6.94 (m, 2H), 6.81 (d,  $J$  = 6.9 Hz, 1H), 4.66 (s, 2H), 3.86 (s, 3H).

$^{13}\text{C}$  NMR (126 MHz, Chloroform-*d*)  $\delta$  = 160.17, 146.90, 141.08, 140.20, 138.39, 132.48, 130.32, 128.79, 128.69, 128.68, 126.75, 119.55, 116.70, 114.25, 95.43, 55.50.

$^{19}\text{F}$  NMR (471 MHz, Chloroform-*d*)  $\delta$  = -140.89.

HR-MS (APPI positive mode):  $m/z$  = calc. for ( $[\text{M}]^+$ ): 318.1163, found: 318.1163.



5'-amino-4,6'-difluoro-[1,1':3',1''-terphenyl]-4'-carbonitrile **3d**

21.5 mg, 70.2  $\mu\text{mol}$ , 35% yield

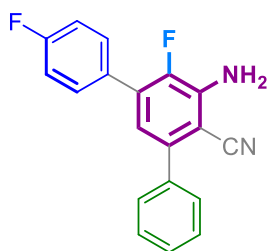

$\text{C}_{19}\text{H}_{12}\text{F}_2\text{N}_2$   
MW: 306.32

$^1\text{H}$  NMR (500 MHz, Chloroform-*d*)  $\delta$  = 7.59 – 7.52 (m, 4H), 7.51 – 7.40 (m, 3H), 7.20 – 7.12 (m, 2H), 6.79 (d,  $J$  = 6.8 Hz, 1H), 4.69 (s, 2H).

$^{13}\text{C}$  NMR (126 MHz, Chloroform-*d*)  $\delta$  = 163.14, 146.86, 141.30, 140.23, 138.19, 131.83, 130.87, 130.49, 128.85, 128.82, 128.69, 119.56, 116.49, 115.88, 96.12.

$^{19}\text{F}$  NMR (471 MHz, Chloroform-*d*)  $\delta$  = -112.49, -140.79.

HR-MS (APPI positive mode):  $m/z$  = calc. for  $([\text{M}]^+)$ : 306.0963, found: 306.0970.

methyl 5'-amino-4'-cyano-6'-fluoro-[1,1':3',1''-terphenyl]-4-carboxylate **3e**

36.9 mg, 107  $\mu\text{mol}$ , 53% yield

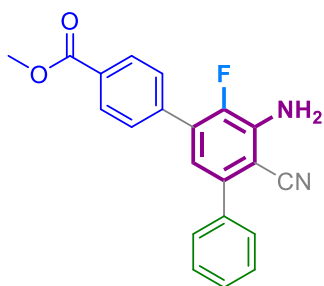

$\text{C}_{21}\text{H}_{15}\text{FN}_2\text{O}_2$   
MW: 346.36

$^1\text{H}$  NMR (500 MHz, Chloroform-*d*)  $\delta$  = 8.13 (d,  $J$  = 8.5 Hz, 2H), 7.64 (dd,  $J$  = 8.4, 1.7 Hz, 2H), 7.60 – 7.52 (m, 2H), 7.52 – 7.36 (m, 3H), 6.83 (d,  $J$  = 6.7 Hz, 1H), 4.72 (s, 2H), 3.95 (s, 3H).

$^{13}\text{C}$  NMR (126 MHz, Chloroform-*d*)  $\delta$  = 166.75, 146.90, 141.42, 140.27, 138.98, 138.06, 131.74, 130.40, 129.99, 129.10, 128.88, 128.87, 128.69, 119.44, 116.36, 96.69, 52.44.

$^{19}\text{F}$  NMR (471 MHz, Chloroform-*d*)  $\delta$  = -140.10.

HR-MS (APPI positive mode):  $m/z$  = calc. for  $([\text{M}]^+)$ : 346.1112, found: 346.1119.

5'-amino-6'-fluoro-4''-methyl-[1,1':3',1''-terphenyl]-4'-carbonitrile **3f**

11.6 mg, 38.4  $\mu\text{mol}$ , 19% yield

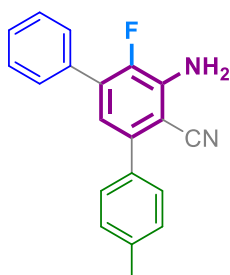

$\text{C}_{20}\text{H}_{15}\text{FN}_2$   
MW: 302.35

$^1\text{H}$  NMR (500 MHz, Chloroform-*d*)  $\delta$  = 7.59 – 7.53 (m, 2H), 7.51 – 7.40 (m, 5H), 7.28 (d,  $J$  = 7.9 Hz, 2H), 6.82 (d,  $J$  = 6.8 Hz, 1H), 4.66 (s, 2H), 2.41 (s, 3H).

$^{13}\text{C}$  NMR (126 MHz, Chloroform-*d*)  $\delta$  = 146.83, 141.22, 140.14, 138.71, 135.42, 134.61, 132.85, 129.53, 129.05, 128.84, 128.77, 128.56, 119.68, 116.73, 96.02, 21.39.

$^{19}\text{F}$  NMR (471 MHz, Chloroform-*d*)  $\delta$  = -140.99.

HR-MS (APPI positive mode):  $m/z$  = calc. for  $([\text{M}]^+)$ : 302.1214, found: 302.1217.

5'-amino-6'-fluoro-4''-methoxy-[1,1':3',1''-terphenyl]-4'-carbonitrile **3g**

40.8 mg, 128  $\mu\text{mol}$ , 64% yield

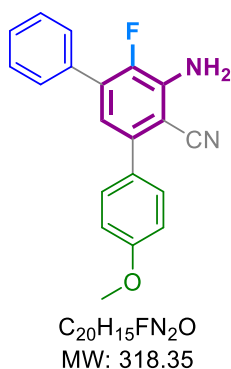

$^1\text{H}$  NMR (500 MHz, Chloroform-*d*)  $\delta$  = 7.65 – 7.53 (m, 2H), 7.55 – 7.37 (m, 5H), 7.00 (d,  $J$  = 8.7 Hz, 2H), 6.80 (d,  $J$  = 6.7 Hz, 1H), 4.65 (s, 2H), 3.86 (s, 3H).

$^{13}\text{C}$  NMR (126 MHz, Chloroform-*d*)  $\delta$  = 160.10, 146.69, 140.90, 140.12, 134.62, 132.86, 130.69, 129.92, 129.04, 128.83, 128.77, 119.58, 116.85, 114.26, 95.94, 55.51.

$^{19}\text{F}$  NMR (471 MHz, Chloroform-*d*)  $\delta$  = -141.28.

HR-MS (APPI positive mode):  $m/z$  = calc. for ( $[\text{M}]^+$ ): 319.1241, found: 319.1247.

5'-amino-4'',6'-difluoro-[1,1':3',1''-terphenyl]-4'-carbonitrile **3h**

19.9 mg, 65.0  $\mu\text{mol}$ , 32% yield

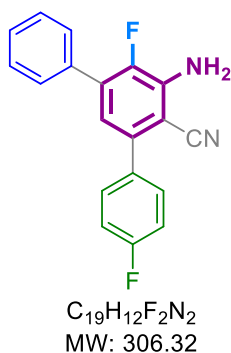

$^1\text{H}$  NMR (500 MHz, Chloroform-*d*)  $\delta$  = 7.61 – 7.41 (m, 7H), 7.24 – 7.06 (m, 2H), 6.79 (d,  $J$  = 6.7 Hz, 1H), 4.69 (s, 2H).

$^{13}\text{C}$  NMR (126 MHz, Chloroform-*d*)  $\delta$  = 163.14, 146.96, 140.28, 140.11, 134.39, 134.33, 132.93, 130.50, 129.02, 128.96, 128.81, 119.70, 116.49, 115.85, 95.93.

$^{19}\text{F}$  NMR (471 MHz, Chloroform-*d*)  $\delta$  = -113.08, -140.38.

HR-MS (APPI positive mode):  $m/z$  = calc. for ( $[\text{M}]^+$ ): 306.0963, found: 306.0966.

methyl 5'-amino-6'-cyano-4'-fluoro-[1,1':3',1''-terphenyl]-4-carboxylate **3i**

17.4 mg, 50.2  $\mu\text{mol}$ , 25% yield

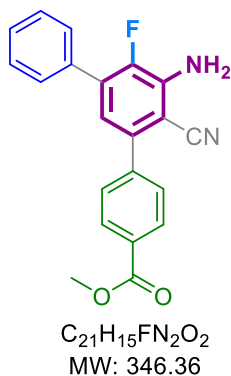

$^1\text{H}$  NMR (500 MHz, Chloroform-*d*)  $\delta$  = 8.23 – 8.01 (m, 2H), 7.69 – 7.60 (m, 2H), 7.60 – 7.53 (m, 2H), 7.53 – 7.34 (m, 3H), 6.84 (d,  $J$  = 6.6 Hz, 1H), 4.73 (s, 2H), 3.95 (s, 3H).

$^{13}\text{C}$  NMR (126 MHz, Chloroform-*d*)  $\delta$  = 166.78, 147.26, 142.66, 140.48, 139.94, 134.26, 132.99, 130.33, 130.09, 129.02, 128.83, 128.79, 119.76, 116.27, 95.69, 52.40.

$^{19}\text{F}$  NMR (283 MHz, Chloroform-*d*)  $\delta$  = -139.45 (d,  $J$  = 6.9 Hz).

HR-MS (APPI positive mode):  $m/z$  = calc. for ( $[\text{M}]^+$ ): 346.1112, found: 346.1115.

5'-amino-4'',6'-difluoro-4-methyl-[1,1':3',1''-terphenyl]-4'-carbonitrile 3j

*Bigscale:* 182.8 mg, 570  $\mu\text{mol}$ , 34% yield

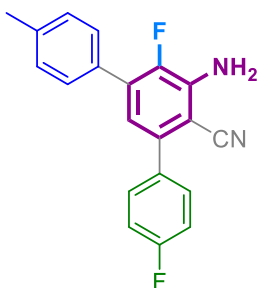

$\text{C}_{20}\text{H}_{14}\text{F}_2\text{N}_2$   
MW: 320.34

$^1\text{H}$  NMR (500 MHz, Chloroform-*d*)  $\delta$  = 7.55 – 7.49 (m, 2H), 7.49 – 7.43 (m, 2H), 7.32 – 7.26 (m, 2H), 7.20 – 7.12 (m, 2H), 6.78 (d,  $J$  = 6.8 Hz, 1H), 4.67 (s, 2H), 2.42 (s, 3H) ppm.

$^{13}\text{C}$  NMR (126 MHz, Chloroform-*d*)  $\delta$  = 163.15, 147.00, 140.26, 140.06, 139.07, 134.42, 132.94, 131.46, 130.50, 129.55, 128.91, 119.66, 116.57, 115.85, 95.68, 21.43 ppm.

$^{19}\text{F}$  NMR (471 MHz, Chloroform-*d*)  $\delta$  = -113.17 (tt,  $J$  = 8.6, 5.3 Hz), -140.41 (dt,  $J$  = 6.9, 1.7 Hz) ppm.

HR-MS (APPI positive mode):  $m/z$  = calc. for  $([\text{M}]^+)$ : 320.1120, found: 320.1123.

## Characterization of triaryl-substituted fluoroanilines 5a-n

### 4'-amino-5'-fluoro-6'-phenyl-[1,1':2',1''-terphenyl]-3'-carbonitrile 5a

37.7 mg, 95.2  $\mu\text{mol}$ , 48% yield

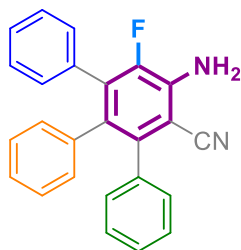

$\text{C}_{25}\text{H}_{17}\text{FN}_2$   
MW: 364.42

$^1\text{H}$  NMR (500 MHz, Chloroform-*d*)  $\delta$  = 7.22 – 7.17 (m, 6H), 7.12 – 7.07 (m, 2H), 7.07 – 7.03 (m, 2H), 6.95 – 6.84 (m, 3H), 6.74 – 6.64 (m, 2H), 4.65 (s, 2H) ppm.

$^{13}\text{C}$  NMR (126 MHz, Chloroform-*d*)  $\delta$  = 147.11, 140.42, 138.44, 137.83, 137.46, 133.61, 133.54, 131.68, 131.43, 130.35, 130.23, 127.96, 127.84, 127.79, 127.70, 127.27, 126.27, 116.35, 98.31 ppm.

$^{19}\text{F}$  NMR (283 MHz, Chloroform-*d*)  $\delta$  = -135.13 ppm.

HR-MS (APPI positive mode):  $m/z$  = calc. for ( $[\text{M}]^+$ ): 364.1370, found: 364.1370.

### 4'-amino-5'-fluoro-6'-(*p*-tolyl)-[1,1':2',1''-terphenyl]-3'-carbonitrile 5b

46.3 mg, 122  $\mu\text{mol}$ , 61 % yield

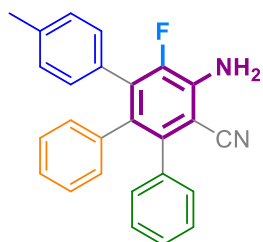

$\text{C}_{26}\text{H}_{19}\text{FN}_2$   
MW: 378.45

$^1\text{H}$  NMR (500 MHz, Chloroform-*d*)  $\delta$  = 7.21 – 7.16 (m, 3H), 7.11 – 7.05 (m, 2H), 7.00 (d,  $J$  = 7.9 Hz, 2H), 6.97 – 6.85 (m, 5H), 6.72 – 6.66 (m, 2H), 4.63 (s, 2H), 2.27 (s, 3H) ppm.

$^{13}\text{C}$  NMR (126 MHz, Chloroform-*d*)  $\delta$  = 147.19, 140.39, 138.42, 137.92, 137.60, 137.47, 133.64, 131.70, 131.48, 130.43, 130.22, 130.22, 128.60, 127.93, 127.74, 127.27, 126.19, 116.40, 98.13, 21.37 ppm.

$^{19}\text{F}$  NMR (283 MHz, Chloroform-*d*)  $\delta$  = -135.15 ppm.

HR-MS (APPI positive mode):  $m/z$  = calc. for ( $[\text{M}]^+$ ): 378.1527, found: 378.1524.

### 4'-amino-5'-fluoro-6'-(4-methoxyphenyl)-[1,1':2',1''-terphenyl]-3'-carbonitrile 5c

12.6 mg, 31.9  $\mu\text{mol}$ , 16% yield

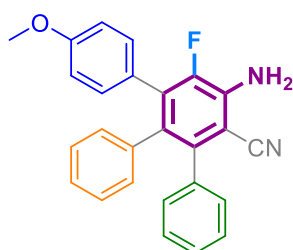

$\text{C}_{26}\text{H}_{19}\text{FN}_2\text{O}$   
MW: 394.45

$^1\text{H}$  NMR (300 MHz, Chloroform-*d*)  $\delta$  = 7.24 – 7.14 (m, 3H), 7.12 – 7.05 (m, 2H), 7.01 – 6.94 (m, 2H), 6.95 – 6.85 (m, 3H), 6.79 – 6.61 (m, 4H), 4.63 (s, 2H), 3.74 (s, 3H) ppm.

$^{13}\text{C}$  NMR (126 MHz, Chloroform-*d*)  $\delta$  = 159.02, 147.27, 140.40, 138.42, 137.94, 137.64, 133.32, 131.72, 131.62, 131.55, 130.22, 127.93, 127.73, 127.34, 126.20, 125.61, 116.42, 113.37, 98.04, 55.26 ppm.

$^{19}\text{F}$  NMR (283 MHz, Chloroform-*d*)  $\delta$  = -135.27 ppm.

HR-MS (APPI positive mode):  $m/z$  = calc. for ( $[\text{M}]^+$ ): 395.1554, found: 395.1557.

4'-amino-5'-fluoro-6'-(4-methoxyphenyl)-[1,1':2',1''-terphenyl]-3'-carbonitrile **5d**

31.4 mg, 82.1  $\mu\text{mol}$ , 41% yield

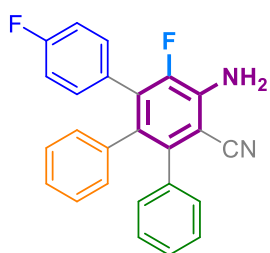

$\text{C}_{25}\text{H}_{16}\text{F}_2\text{N}_2$   
MW: 382.41

$^1\text{H}$  NMR (400 MHz, Chloroform-*d*)  $\delta$  = 7.23 – 7.16 (m, 3H), 7.14 – 7.06 (m, 2H), 7.07 – 6.99 (m, 2H), 6.96 – 6.84 (m, 5H), 6.74 – 6.62 (m, 2H), 4.67 (s, 2H) ppm.

$^{13}\text{C}$  NMR (101 MHz, Chloroform-*d*)  $\delta$  = 162.08 (d,  $J$  = 247.7 Hz), 147.00 (d,  $J$  = 239.9 Hz), 140.42 (d,  $J$  = 3.9 Hz), 138.46, 138.30, 137.61, 137.20 (d,  $J$  = 2.1 Hz), 132.43 (d,  $J$  = 12.4 Hz), 131.99 (dd,  $J$  = 8.0, 1.0 Hz), 131.53, 131.25, 130.07, 129.30 (d,  $J$  = 3.7 Hz), 127.87, 127.73, 127.32, 126.29, 116.14 (d,  $J$  = 4.3 Hz), 114.90 (d,  $J$  = 21.8 Hz), 98.34 (d,  $J$  = 5.7 Hz) ppm.

$^{19}\text{F}$  NMR (377 MHz, Chloroform-*d*)  $\delta$  = -113.85, -135.15 ppm.

HR-MS (APPI positive mode):  $m/z$  = calc. for  $([\text{M}]^+)$ : 382.1276, found: 382.1282.

4'-amino-5'-fluoro-6'-(4-methoxyphenyl)-[1,1':2',1''-terphenyl]-3'-carbonitrile **5e**

32.4 mg, 72.1  $\mu\text{mol}$ , 36% yield

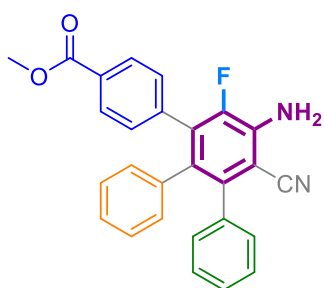

$\text{C}_{27}\text{H}_{19}\text{FN}_2\text{O}_2$   
MW: 422.46

$^1\text{H}$  NMR (300 MHz, Chloroform-*d*)  $\delta$  = 7.86 (d,  $J$  = 8.5 Hz, 2H), 7.24 – 7.15 (m, 4H), 7.17 – 7.04 (m, 5H), 6.97 – 6.82 (m, 3H), 6.71 – 6.63 (m, 2H), 4.68 (s, 2H), 3.87 (s, 3H) ppm.

$^{13}\text{C}$  NMR (151 MHz, Chloroform-*d*)  $\delta$  = 166.87, 146.89 (d,  $J$  = 241.0 Hz), 140.65 (d,  $J$  = 3.9 Hz), 138.51, 138.47, 138.40, 137.56, 137.02 (d,  $J$  = 1.9 Hz), 131.58, 130.49 (d,  $J$  = 1.1 Hz), 130.18, 129.35, 129.11, 128.02, 127.92, 127.47, 126.58, 116.15 (d,  $J$  = 4.3 Hz), 98.82 (d,  $J$  = 5.7 Hz), 74.63, 52.29 ppm.

$^{19}\text{F}$  NMR (283 MHz, Chloroform-*d*)  $\delta$  = -135.06 ppm.

HR-MS (APPI positive mode):  $m/z$  = calc. for  $([\text{M}]^+)$ : 422.1425, found: 422.1432.

4'-amino-5'-fluoro-4-methyl-6'-phenyl-[1,1':2',1''-terphenyl]-3'-carbonitrile **5f**

19.5 mg, 51.5  $\mu\text{mol}$ , 26% yield

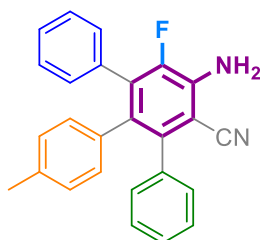

$\text{C}_{26}\text{H}_{19}\text{FN}_2$   
MW: 378.45

$^1\text{H}$  NMR (500 MHz, Chloroform-*d*)  $\delta$  = 7.22 – 7.17 (m, 2H), 7.11 – 7.07 (m, 3H), 7.07 – 7.02 (m, 4H), 6.68 (d,  $J$  = 7.7 Hz, 3H), 6.54 (d,  $J$  = 8.1 Hz, 2H), 4.62 (s, 2H), 2.10 (s, 3H) ppm.

$^{13}\text{C}$  NMR (126 MHz, Chloroform-*d*)  $\delta$  = 147.13, 140.47, 138.27, 138.01, 135.73, 135.65, 134.32, 133.69, 131.48, 131.47, 130.36, 130.23, 128.00, 127.95, 127.83, 127.69, 127.61, 116.41, 98.35, 21.16 ppm.

$^{19}\text{F}$  NMR (471 MHz, Chloroform-*d*)  $\delta$  = -135.09 ppm.

HR-MS (ESI positive mode):  $m/z$  = calc. for  $([\text{M}+\text{H}]^+)$ : 379.160503, found: 379.159303.

4'-amino-5'-fluoro-4-methoxy-6'-phenyl-[1,1':2',1''-terphenyl]-3'-carbonitrile **5g**

21.6 mg, 54.8  $\mu\text{mol}$ , 27% yield

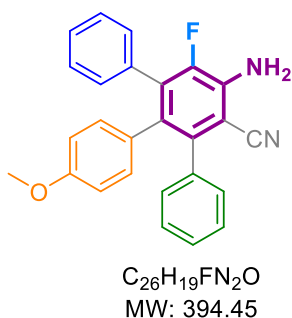

$^1\text{H}$  NMR (300 MHz, Chloroform-*d*)  $\delta$  = 7.25 – 7.16 (m, 6H), 7.14 – 7.01 (m, 4H), 6.57 (d,  $J$  = 8.9 Hz, 2H), 6.42 (d,  $J$  = 8.8 Hz, 2H), 4.62 (s, 2H), 3.62 (s, 3H) ppm.

$^{13}\text{C}$  NMR (126 MHz, Chloroform-*d*)  $\delta$  = 157.81, 147.13, 140.58, 138.27, 138.02, 133.80, 133.70, 132.69, 131.09, 130.36, 130.23, 129.73, 128.01, 127.90, 127.71, 127.63, 116.41, 112.76, 98.32, 55.07 ppm.

$^{19}\text{F}$  NMR (283 MHz, Chloroform-*d*)  $\delta$  = -135.02 ppm.

HR-MS (ESI positive mode):  $m/z$  = calc. for  $([\text{M}+\text{H}]^+)$ : 395.155418, found: 395.155716.

4'-amino-4,5'-difluoro-6'-phenyl-[1,1':2',1''-terphenyl]-3'-carbonitrile **5h**

61.5 mg, 161  $\mu\text{mol}$ , 80% yield

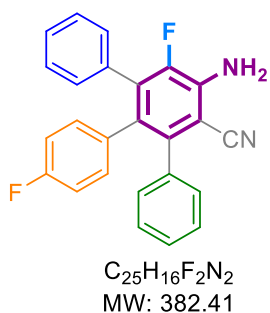

$^1\text{H}$  NMR (300 MHz, Chloroform-*d*)  $\delta$  = 7.27 – 7.16 (m, 6H), 7.12 – 7.00 (m, 4H), 6.69 – 6.54 (m, 4H), 4.67 (s, 2H) ppm.

$^{13}\text{C}$  NMR (126 MHz, Chloroform-*d*)  $\delta$  = 161.23, 147.08, 140.56, 138.61, 137.66, 133.66, 133.45, 133.38, 133.16, 130.29, 130.22, 130.16, 128.11, 128.00, 127.92, 127.83, 116.22, 114.37, 98.32 ppm.

$^{19}\text{F}$  NMR (283 MHz, Chloroform-*d*)  $\delta$  = -115.72, -134.89 ppm.

HR-MS (ESI positive mode):  $m/z$  = calc. for  $([\text{M}+\text{H}]^+)$ : 383.135431, found: 383.135499.

methyl 4'-amino-3'-cyano-5'-fluoro-6'-phenyl-[1,1':2',1''-terphenyl]-4-carboxylate **5i**

40.9 mg, 96.8  $\mu\text{mol}$ , 48% yield

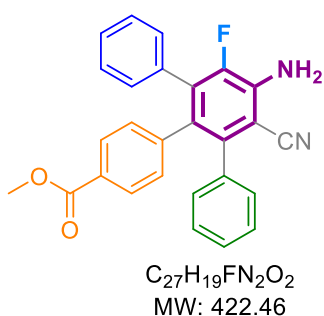

$^1\text{H}$  NMR (300 MHz, Chloroform-*d*)  $\delta$  = 7.57 (d,  $J$  = 8.4 Hz, 2H), 7.24 – 7.15 (m, 6H), 7.11 – 6.99 (m, 4H), 6.76 (d,  $J$  = 8.5 Hz, 2H), 4.72 (s, 2H), 3.80 (s, 3H) ppm.

$^{13}\text{C}$  NMR (126 MHz, Chloroform-*d*)  $\delta$  = 166.95, 147.05, 142.67, 140.35, 138.88, 137.35, 133.35, 133.08, 131.73, 130.23, 130.12, 130.11, 128.55, 128.13, 128.07, 128.02, 127.97, 127.84, 116.11, 98.36, 52.09 ppm.

$^{19}\text{F}$  NMR (283 MHz, Chloroform-*d*)  $\delta$  = -134.97 ppm.

HR-MS (ESI positive mode):  $m/z$  = calc. for  $([\text{M}+\text{H}]^+)$ : 423.150333, found: 423.150016.

4'-amino-5'-fluoro-4''-methyl-6'-phenyl-[1,1':2',1''-terphenyl]-3'-carbonitrile **5j**

34.4 mg, 90.9  $\mu\text{mol}$ , 45% yield

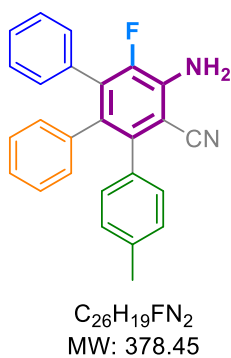

$^1\text{H}$  NMR (300 MHz, Chloroform-*d*)  $\delta$  = 7.24 – 7.12 (m, 3H), 7.09 – 7.02 (m, 2H), 6.99 (s, 4H), 6.95 – 6.82 (m, 3H), 6.82 – 6.59 (m, 2H), 4.63 (s, 2H), 2.27 (s, 3H) ppm.

$^{13}\text{C}$  NMR (126 MHz, Chloroform-*d*)  $\delta$  = 147.00, 140.48, 138.40, 137.58, 137.42, 134.81, 133.62, 133.56, 131.68, 131.37, 130.33, 130.05, 128.68, 127.80, 127.63, 127.24, 126.17, 116.50, 98.44, 21.35 ppm.

$^{19}\text{F}$  NMR (283 MHz, Chloroform-*d*)  $\delta$  = -135.36 ppm.

HR-MS (APPI positive mode):  $m/z$  = calc. for ( $[\text{M}]^+$ ): 379.1605, found: 379.1607.

4'-amino-5'-fluoro-4''-methoxy-6'-phenyl-[1,1':2',1''-terphenyl]-3'-carbonitrile **5k**

32.9 mg, 83.4  $\mu\text{mol}$ , 42% yield

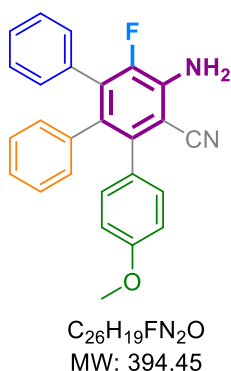

$^1\text{H}$  NMR (300 MHz, Chloroform-*d*)  $\delta$  = 7.21 – 7.13 (m, 3H), 7.10 – 6.95 (m, 4H), 6.95 – 6.82 (m, 3H), 6.82 – 6.57 (m, 4H), 4.63 (s, 2H), 3.74 (s, 3H) ppm.

$^{13}\text{C}$  NMR (126 MHz, Chloroform-*d*)  $\delta$  = 159.03, 146.98, 140.15, 138.40, 137.61, 133.64, 133.58, 131.69, 131.53, 131.43, 130.33, 130.09, 127.81, 127.64, 127.32, 126.18, 116.55, 113.43, 98.53, 55.22 ppm.

$^{19}\text{F}$  NMR (283 MHz, Chloroform-*d*)  $\delta$  = -135.42 ppm.

HR-MS (APPI positive mode):  $m/z$  = calc. for ( $[\text{M}]^+$ ): 394.1476, found: 394.1474.

4'-amino-4'',5'-difluoro-6'-phenyl-[1,1':2',1''-terphenyl]-3'-carbonitrile **5l**

39.3 mg, 103  $\mu\text{mol}$ , 51% yield

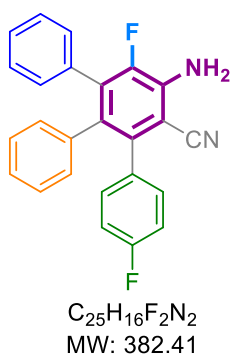

$^1\text{H}$  NMR (300 MHz, Chloroform-*d*)  $\delta$  = 7.23 – 7.14 (m, 3H), 7.14 – 6.98 (m, 4H), 6.98 – 6.82 (m, 5H), 6.79 – 6.51 (m, 2H), 4.67 (s, 2H) ppm.

$^{13}\text{C}$  NMR (126 MHz, Chloroform-*d*)  $\delta$  = 162.26, 147.18, 139.29, 138.56, 137.30, 133.79, 133.70, 133.40, 131.97, 131.61, 131.58, 130.29, 127.87, 127.77, 127.42, 126.41, 116.27, 115.10, 98.23 ppm.

$^{19}\text{F}$  NMR (283 MHz, Chloroform-*d*)  $\delta$  = -113.87, -113.90 ppm.

HR-MS (APPI positive mode):  $m/z$  = calc. for ( $[\text{M}]^+$ ): 382.1276, found: 382.1281.

methyl 5'-amino-6'-cyano-4'-fluoro-3'-phenyl-[1,1':2',1''-terphenyl]-4-carboxylate **5m**

34.1 mg, 80.7  $\mu\text{mol}$ , 40% yield

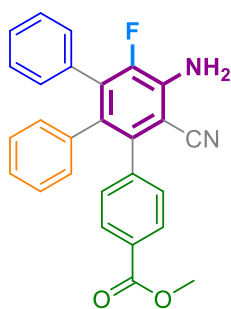

$\text{C}_{27}\text{H}_{19}\text{FN}_2\text{O}_2$   
MW: 422.46

$^1\text{H}$  NMR (300 MHz, Chloroform-*d*)  $\delta$  = 7.99 – 7.77 (m, 2H), 7.24 – 7.12 (m, 5H), 7.12 – 6.95 (m, 2H), 6.96 – 6.80 (m, 3H), 6.75 – 6.50 (m, 2H), 4.69 (s, 2H), 3.87 (s, 3H) ppm.

$^{13}\text{C}$  NMR (126 MHz, Chloroform-*d*)  $\delta$  = 166.85, 147.34, 142.63, 139.24, 138.71, 137.02, 133.76, 133.24, 131.56, 131.34, 130.39, 130.29, 129.40, 129.29, 127.90, 127.83, 127.46, 126.57, 116.05, 97.75, 52.24 ppm.

$^{19}\text{F}$  NMR (283 MHz, Chloroform-*d*)  $\delta$  = -134.22 ppm.

HR-MS (APPI positive mode):  $m/z$  = calc. for  $([\text{M}]^+)$ : 423.1503, found: 423.1499.

4'-amino-4'',5'-difluoro-6'-(*p*-tolyl)-[1,1':2',1''-terphenyl]-3'-carbonitrile **5n**

50.2 mg, 127  $\mu\text{mol}$ , 63% yield

*Bigscale*: 1.05 g, 2.66 mmol, 33% yield

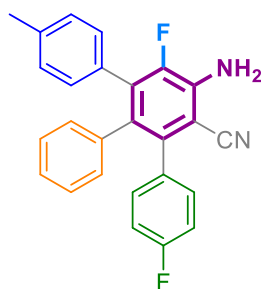

$\text{C}_{26}\text{H}_{18}\text{F}_2\text{N}_2$   
MW: 396.44

$^1\text{H}$  NMR (300 MHz, Chloroform-*d*)  $\delta$  = 7.14 – 6.96 (m, 5H), 6.96 – 6.84 (m, 7H), 6.74 – 6.62 (m, 2H), 4.64 (s, 2H), 2.27 (s, 3H) ppm.

$^{13}\text{C}$  NMR (126 MHz, Chloroform-*d*)  $\delta$  = 162.24, 147.27, 139.27, 138.52, 137.56, 137.45, 133.88, 133.74, 131.97, 131.64, 131.63, 130.29, 130.17, 128.63, 127.43, 126.34, 116.33, 115.08, 98.06, 21.36 ppm.

$^{19}\text{F}$  NMR (471 MHz, Chloroform-*d*)  $\delta$  = -113.99, -134.78 ppm.

HR-MS (APPI positive mode):  $m/z$  = calc. for  $([\text{M}]^+)$ : 396.1433, found: 396.1443.

Elemental Analysis: calc. (%): N (7.07), C (78.8), H (4.58); found: N (7.03), C (78.4), H (4.68).



# $^1\text{H}$ , $^{13}\text{C}$ and $^{19}\text{F}$ -NMR-spectra of 3a in $\text{CDCl}_3$

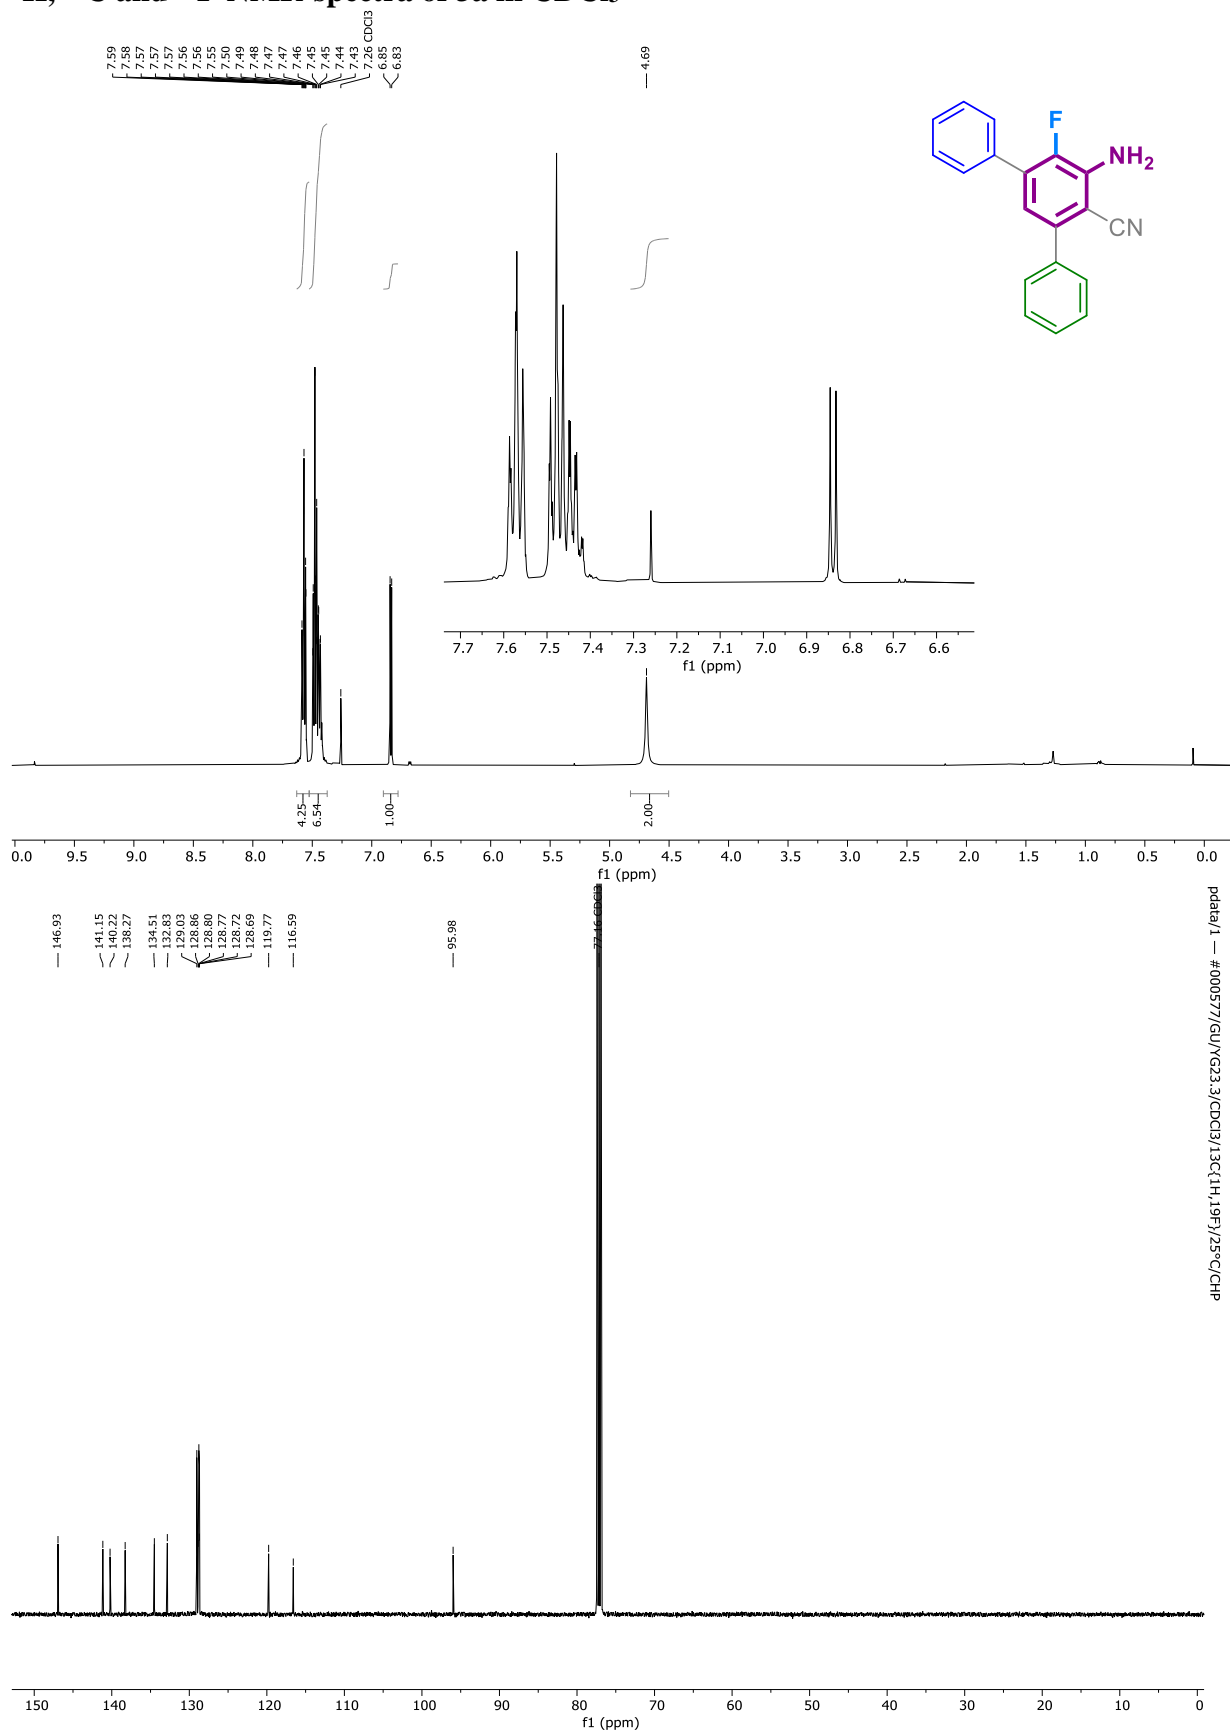

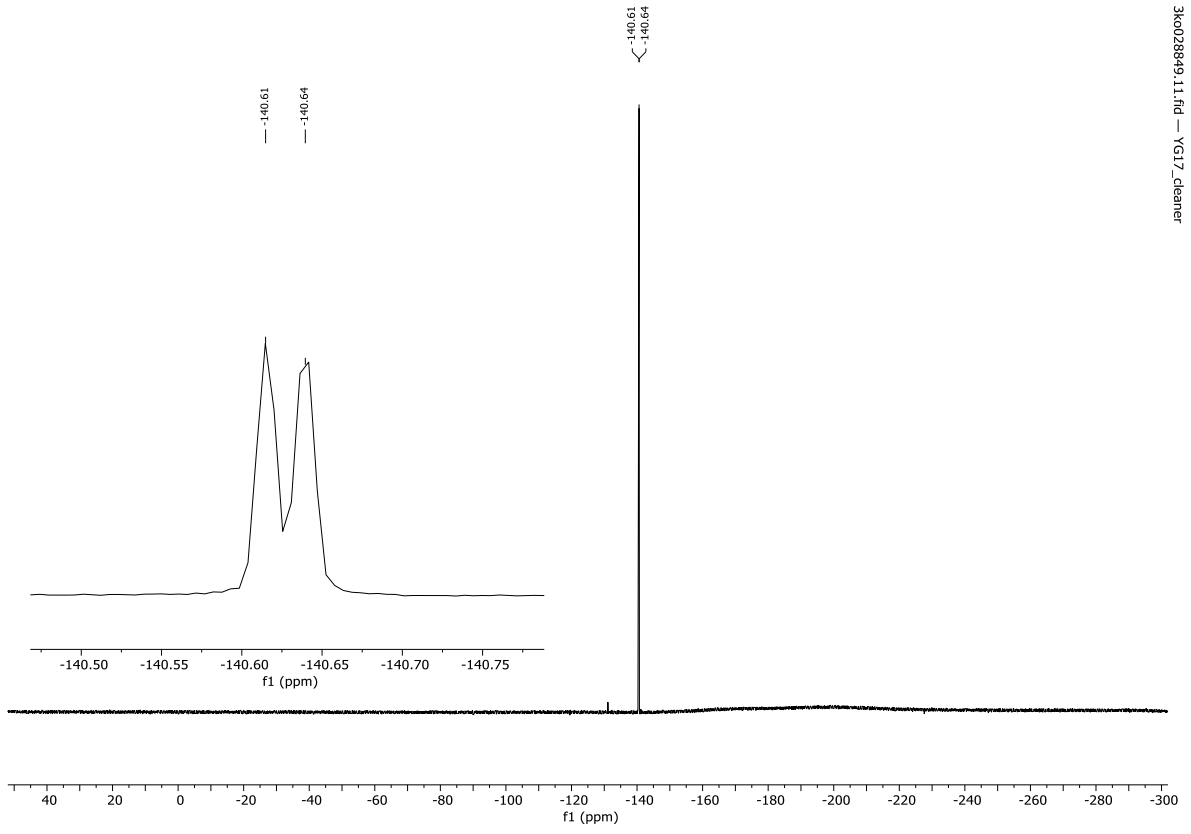

**<sup>1</sup>H, <sup>13</sup>C and <sup>19</sup>F-NMR-spectra of 3b in CDCl<sub>3</sub>**

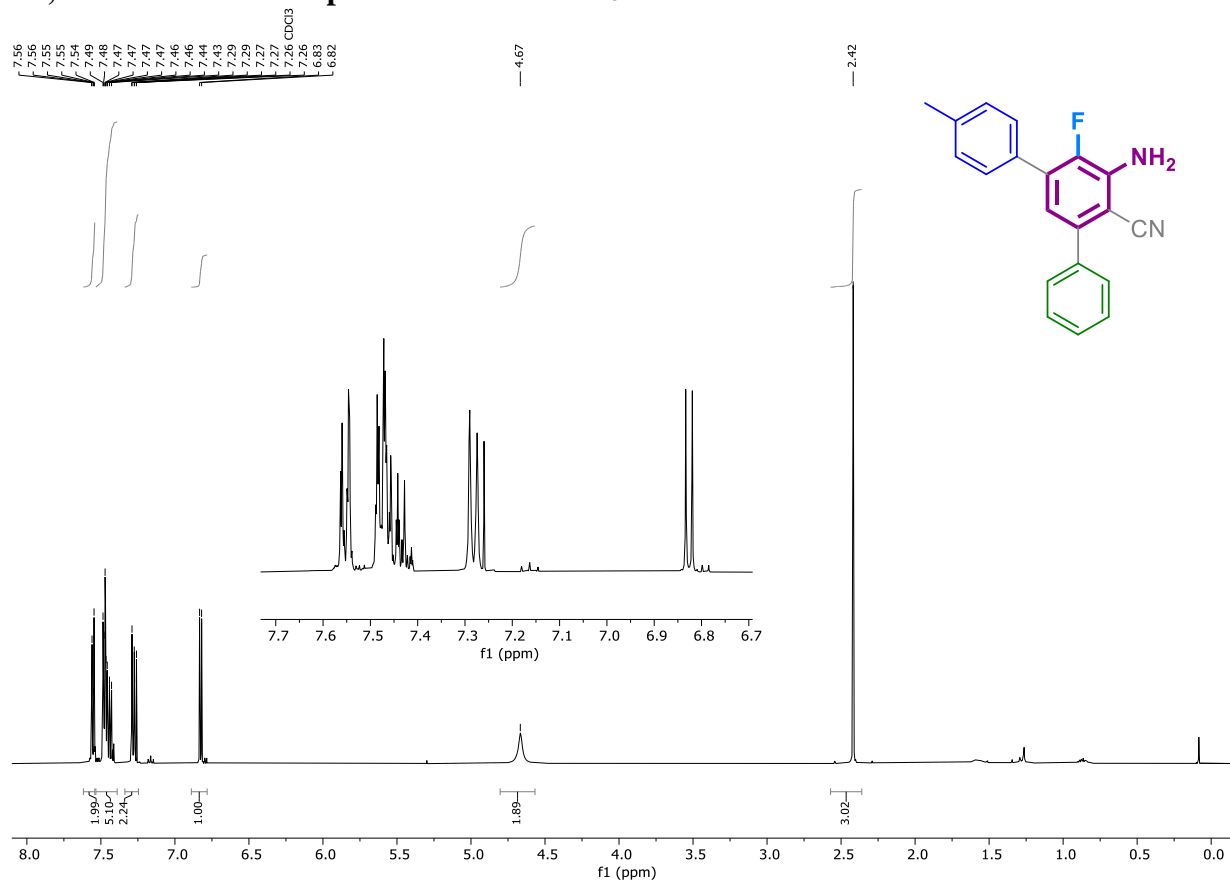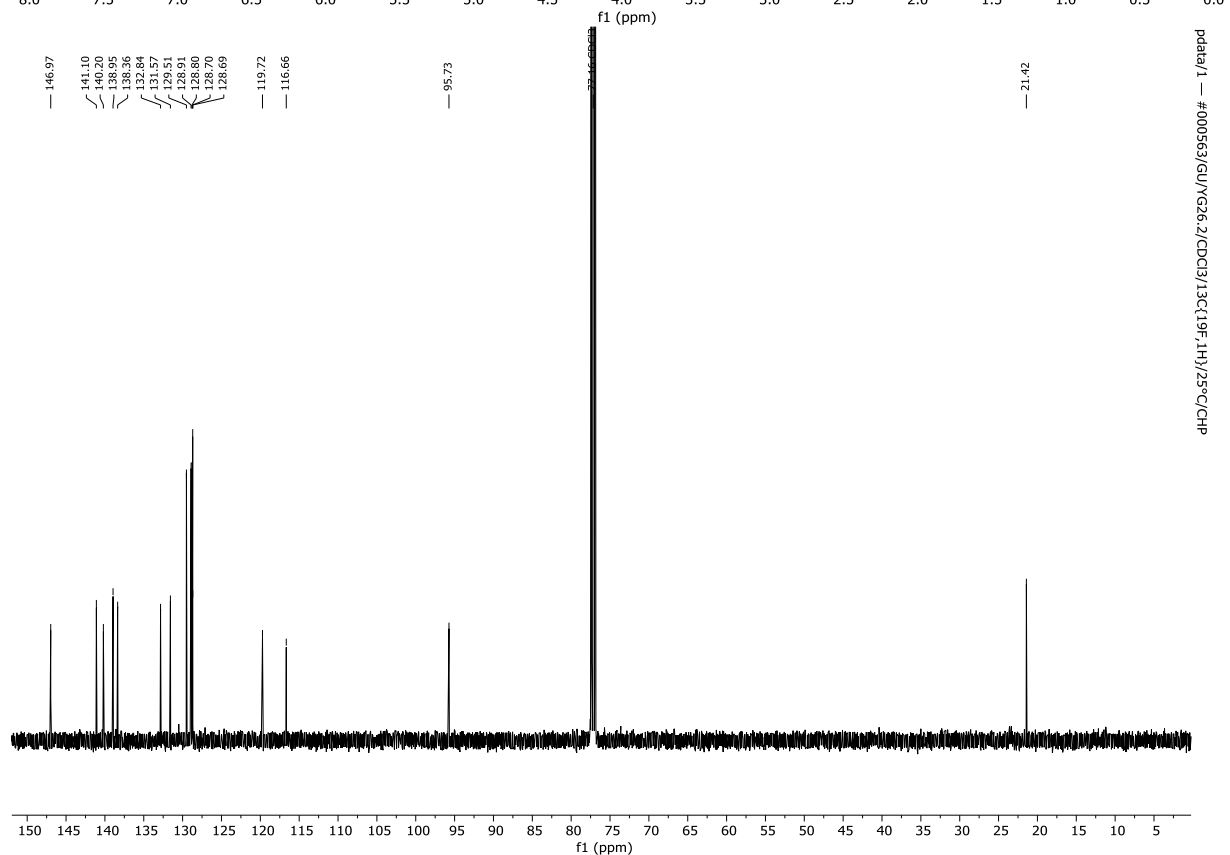

pdata/1 — #000563/GU/SG26.2/CDCl3/1H/25°C/CHP

pdata/1 — #000563/GU/SG26.2/CDCl3/13C(19F)/25°C/CHP

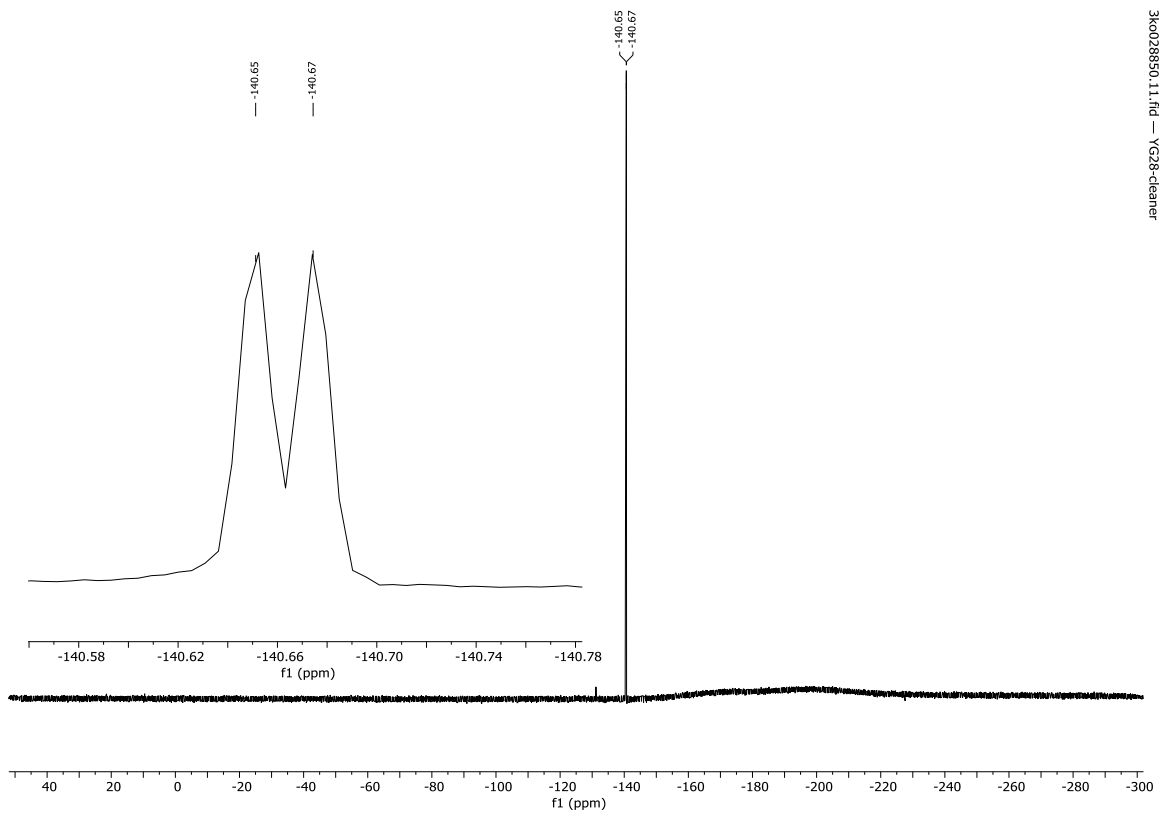

3k0028850.11.fid — YG28-cleaner

# $^1\text{H}$ , $^{13}\text{C}$ and $^{19}\text{F}$ -NMR-spectra of 3c in $\text{CDCl}_3$

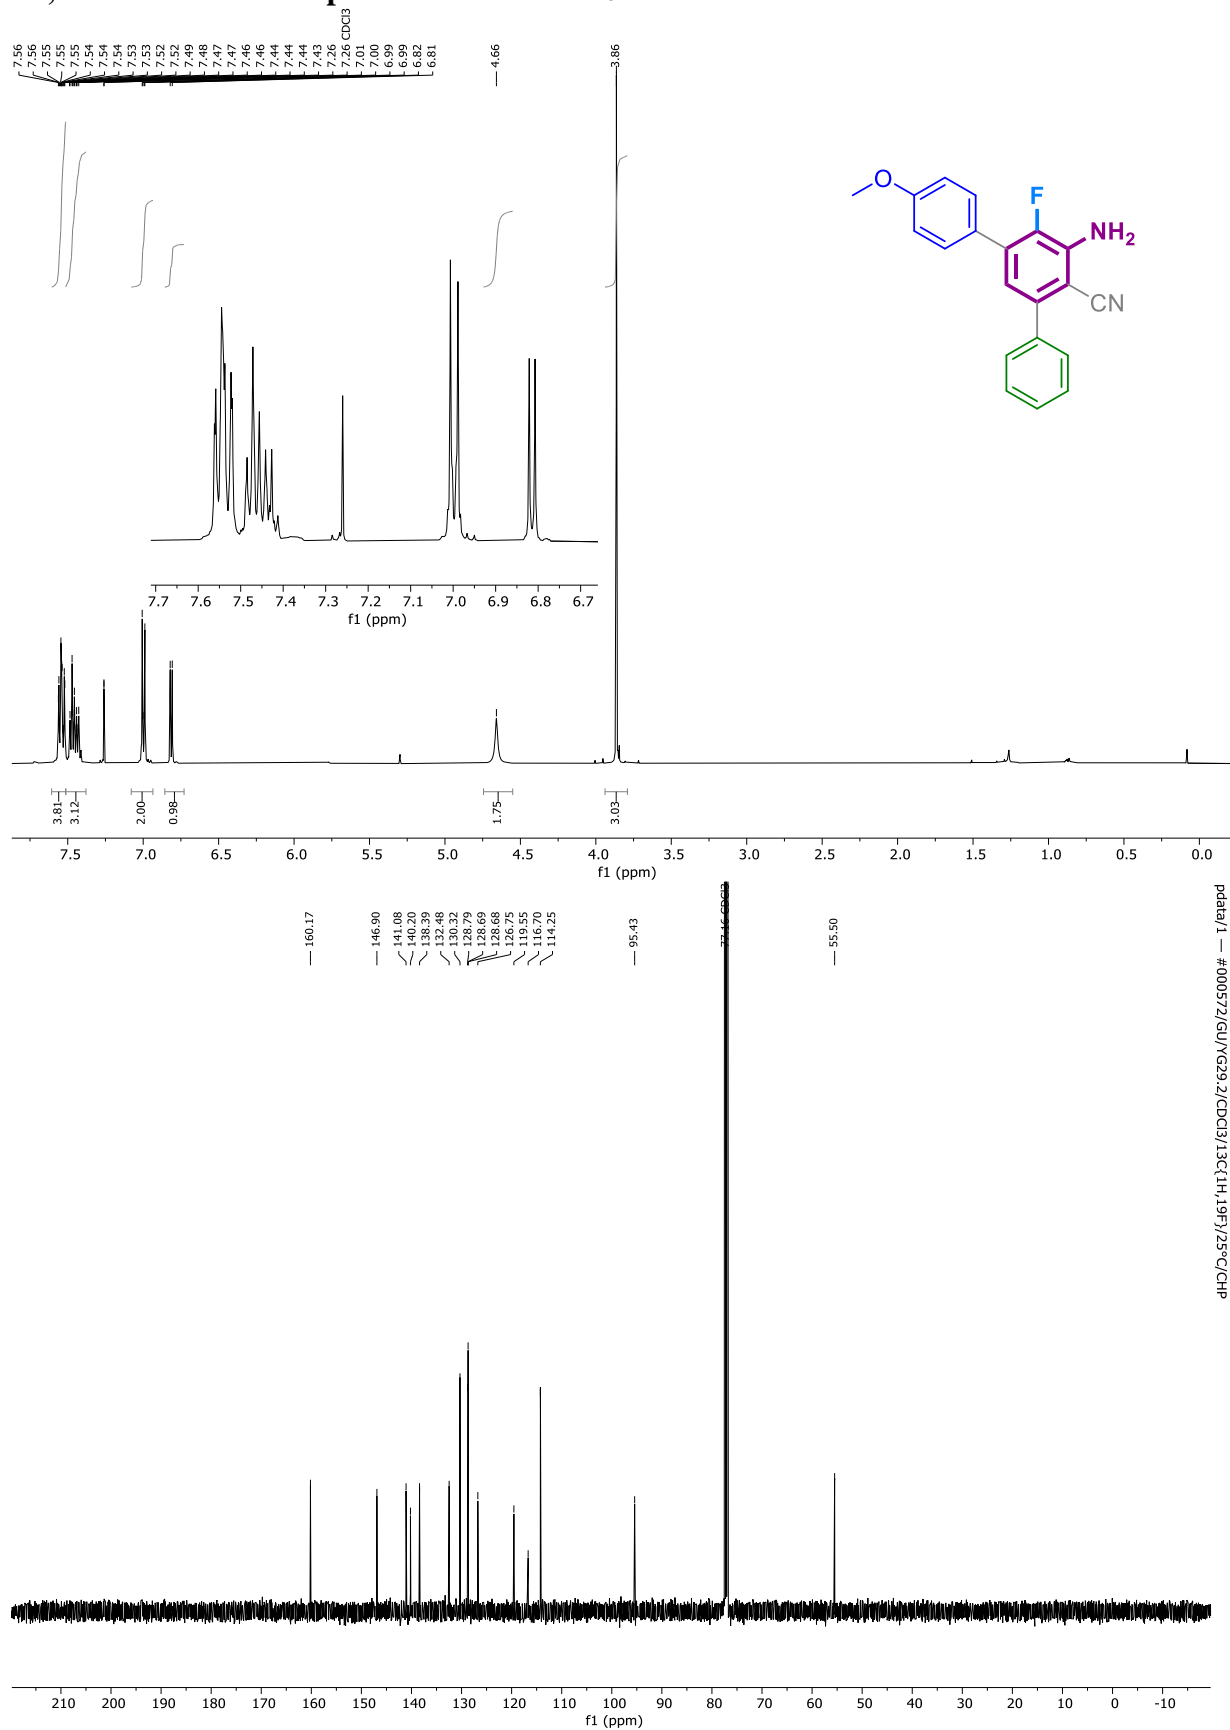

pdata/1 — #000572/GU/VS29.2/CDCl3/1H/25°C/CHP

pdata/1 — #000572/GU/VS29.2/CDCl3/13C(1H,19F)/25°C/CHP

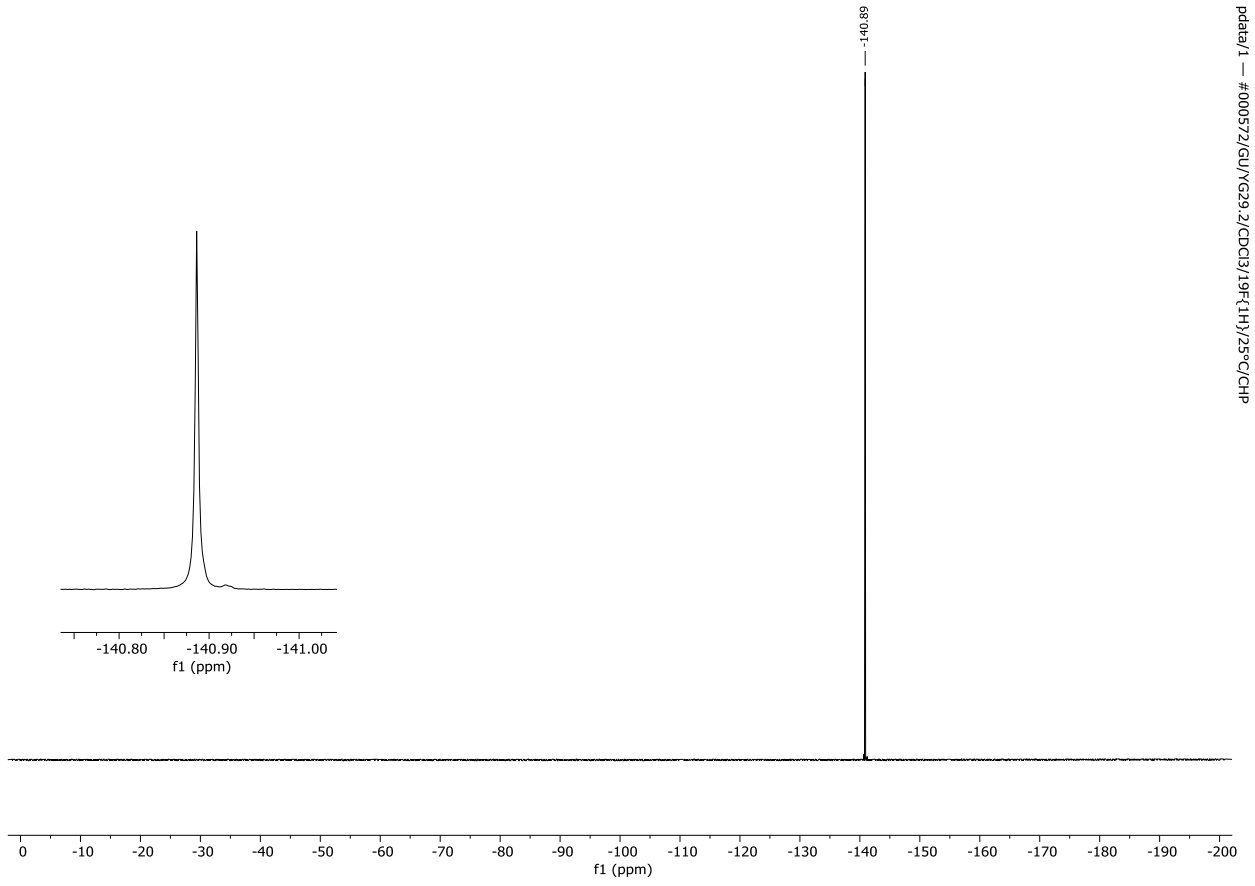

**<sup>1</sup>H, <sup>13</sup>C and <sup>19</sup>F-NMR-spectra of 3d in CDCl<sub>3</sub>**

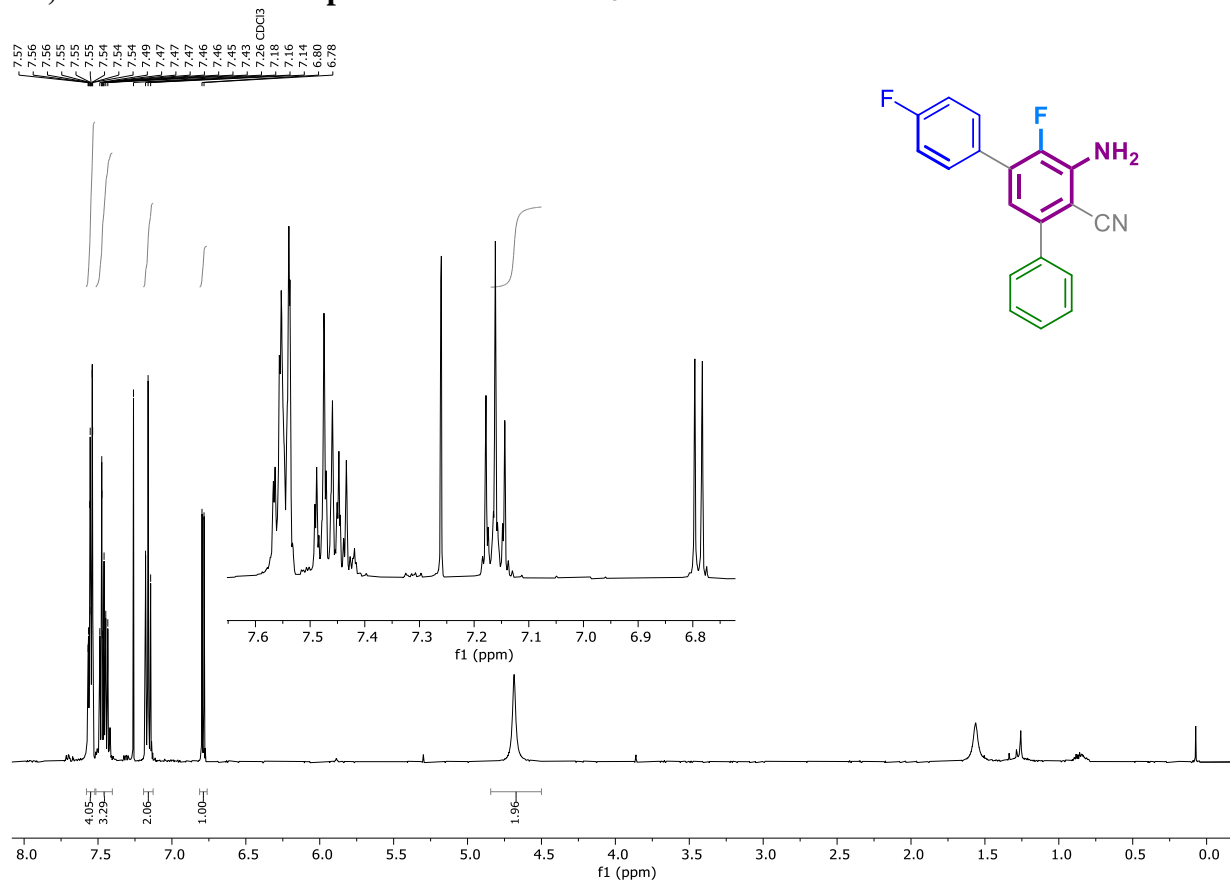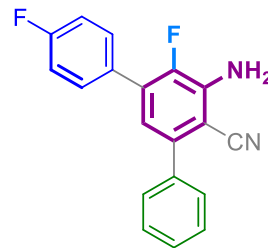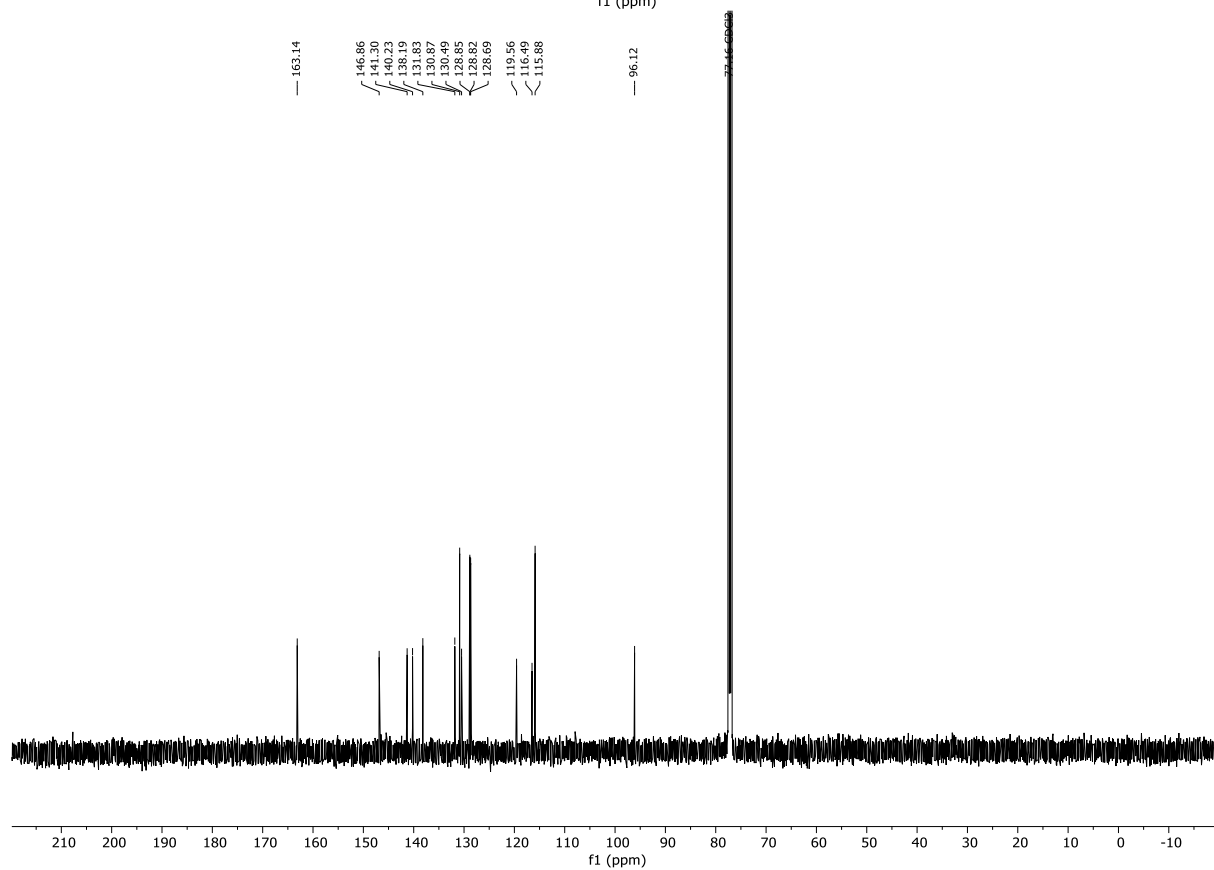

pdata/1 — #000571/GU/VS30.2/CDCl3/1H/25°C/CHP

pdata/1 — #000571/GU/VS30.2/CDCl3/13C/1H/25°C/CHP

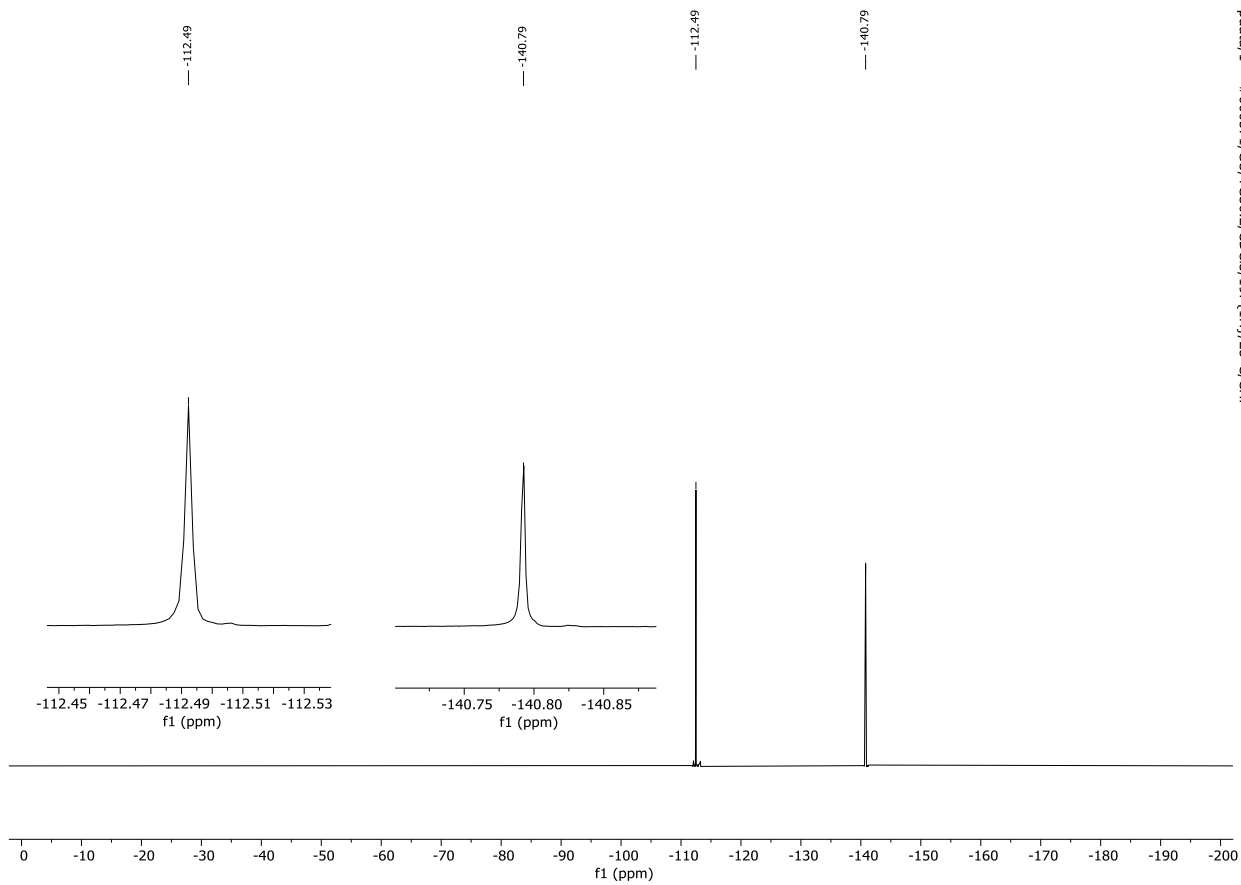

pdata1/1 — #000571/SU/XG30.2/CDCl3/19F{1H}/25°C/CHP



**$^1\text{H}$ ,  $^{13}\text{C}$  and  $^{19}\text{F}$ -NMR-spectra of 3e in  $\text{CDCl}_3$**

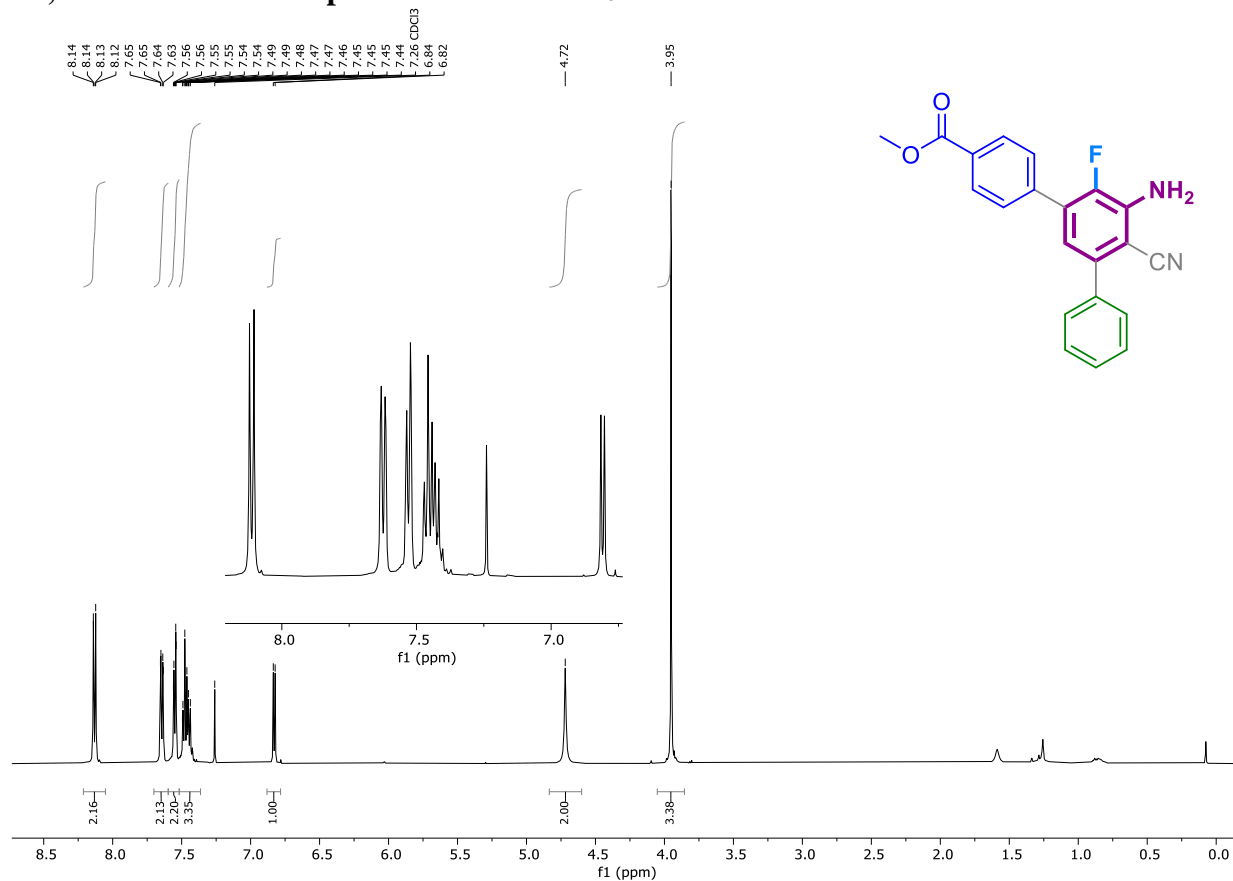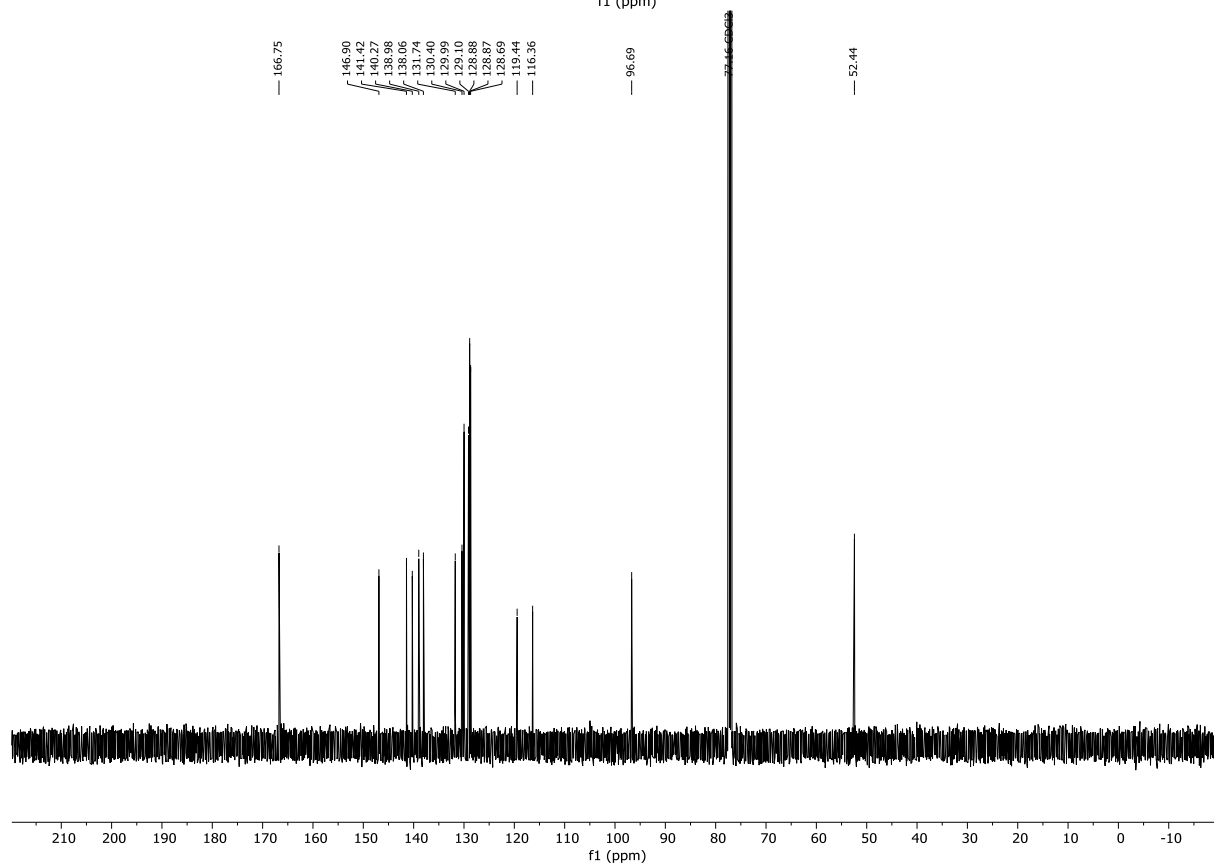

pdata/1 — #000576/GU/TS31.2/CDCl3/1H/25°C/CHP

pdata/1 — #000576/GU/TS31.2/CDCl3/13C(19F,1H)/25°C/CHP

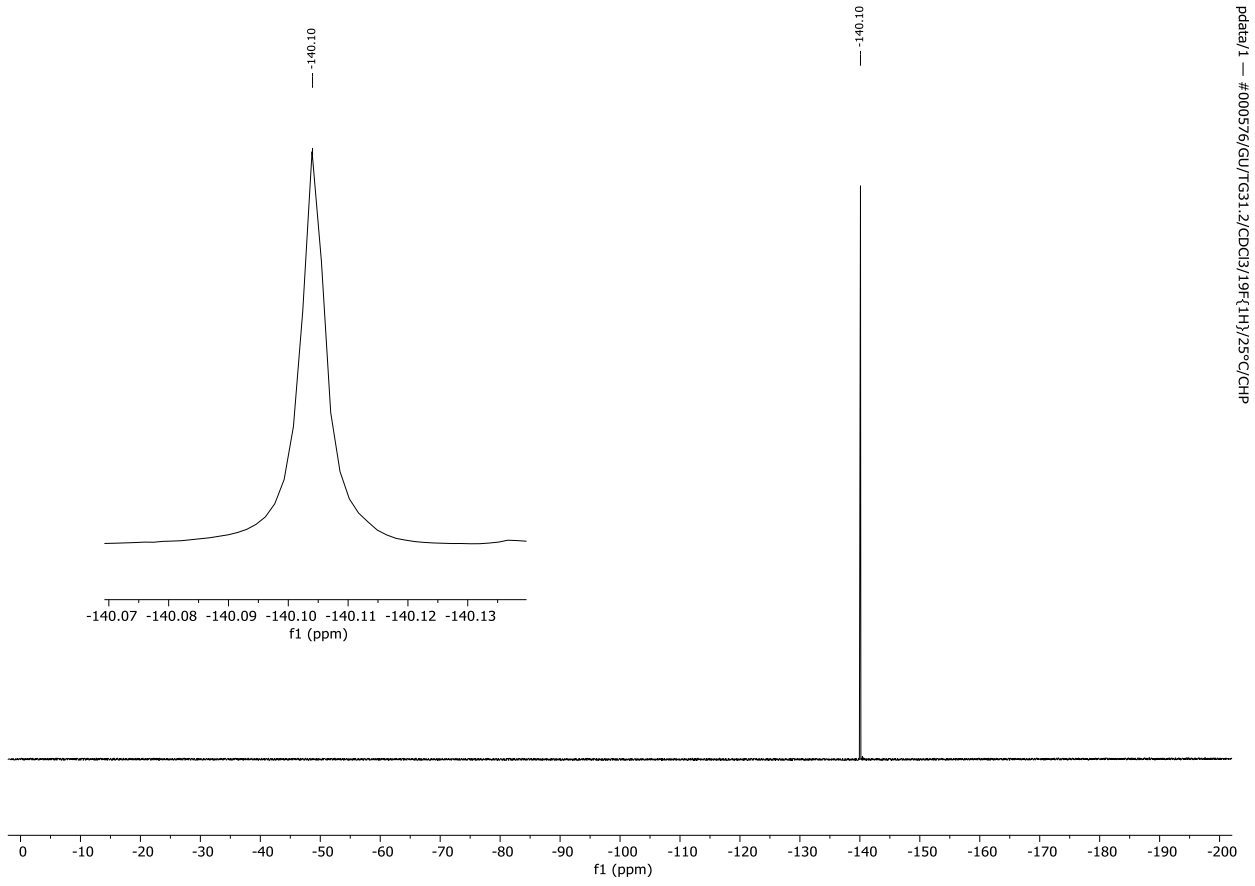

# $^1\text{H}$ , $^{13}\text{C}$ and $^{19}\text{F}$ -NMR-spectra of 3f in $\text{CDCl}_3$

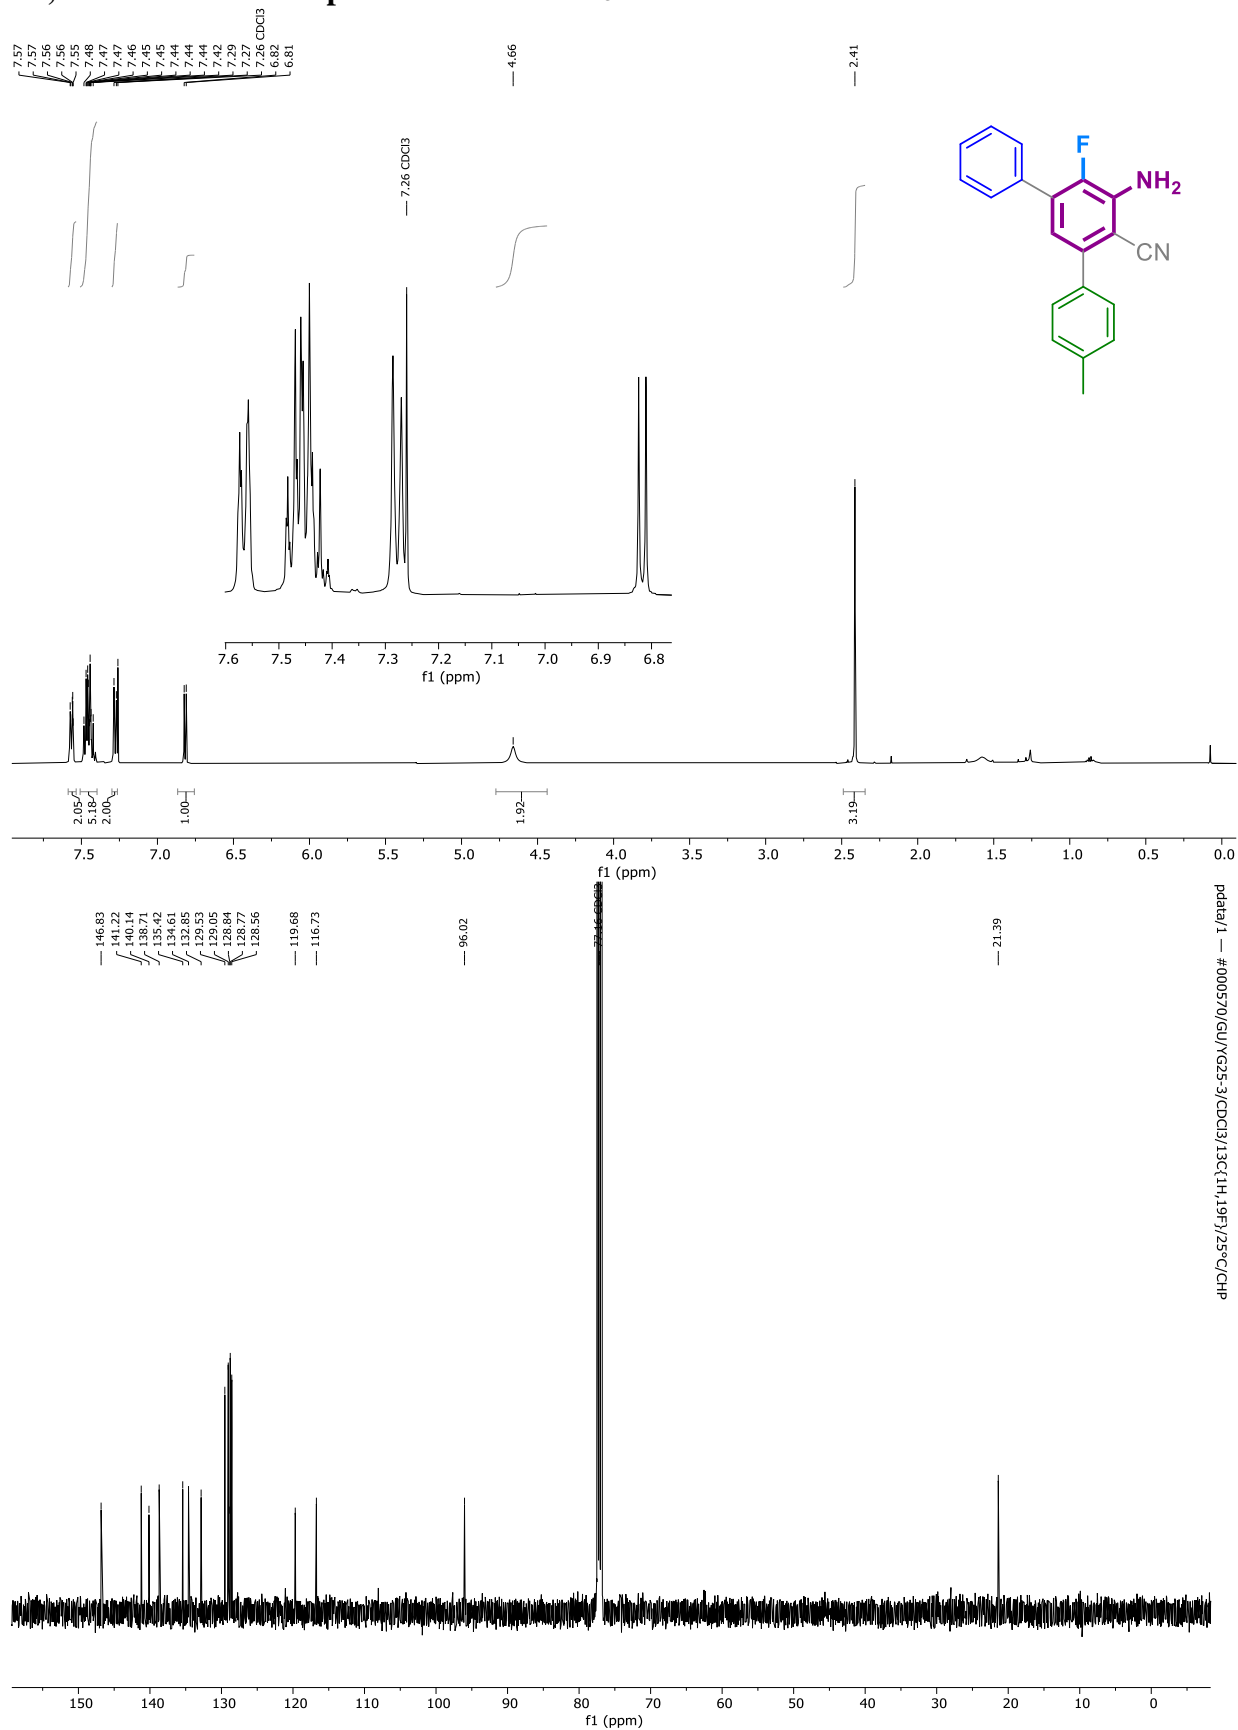

pdata/1 — #000570/GU/VG25-3/CDCl3/1H/25°C/CHP

pdata/1 — #000570/GU/VG25-3/CDCl3/13C(1H,19F)/25°C/CHP

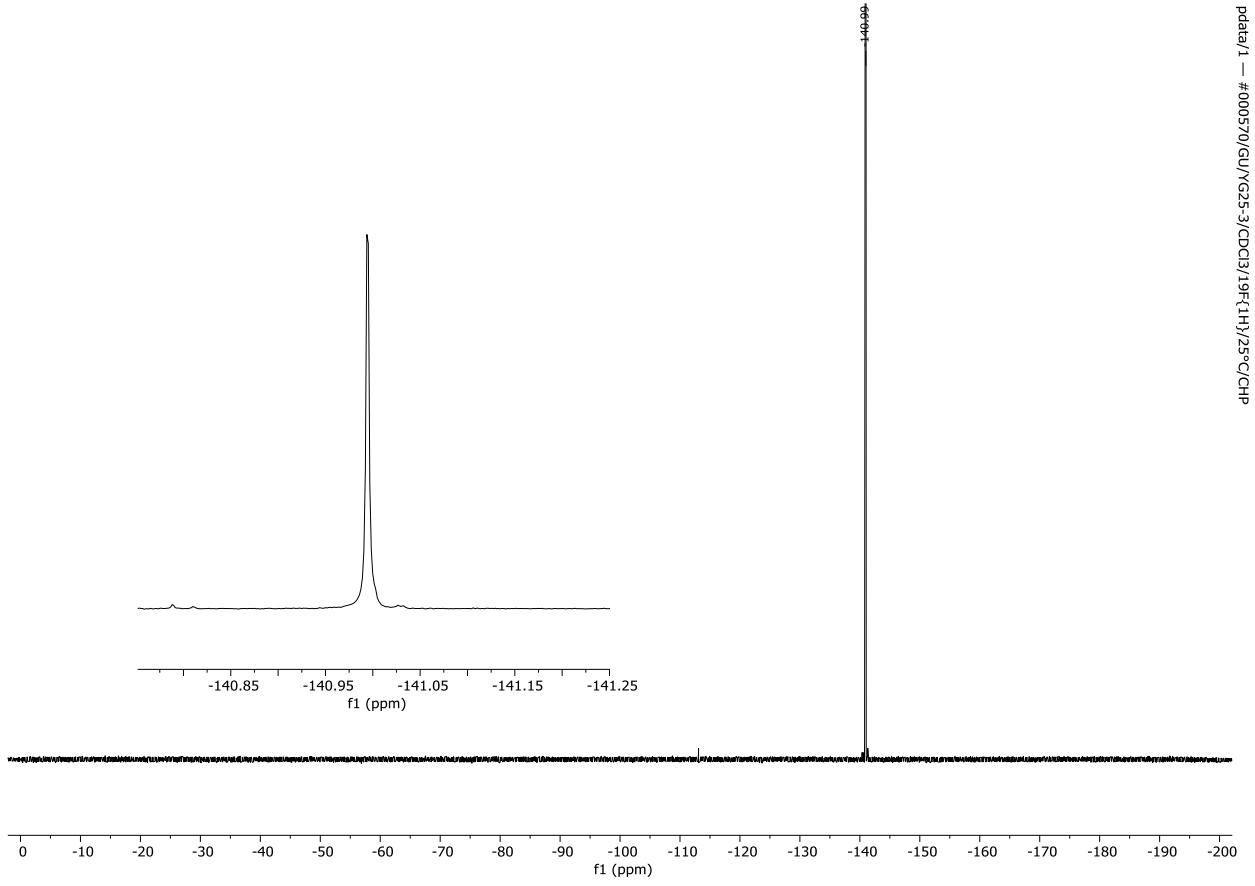

# <sup>1</sup>H, <sup>13</sup>C and <sup>19</sup>F-NMR-spectra of 3g in CDCl<sub>3</sub>

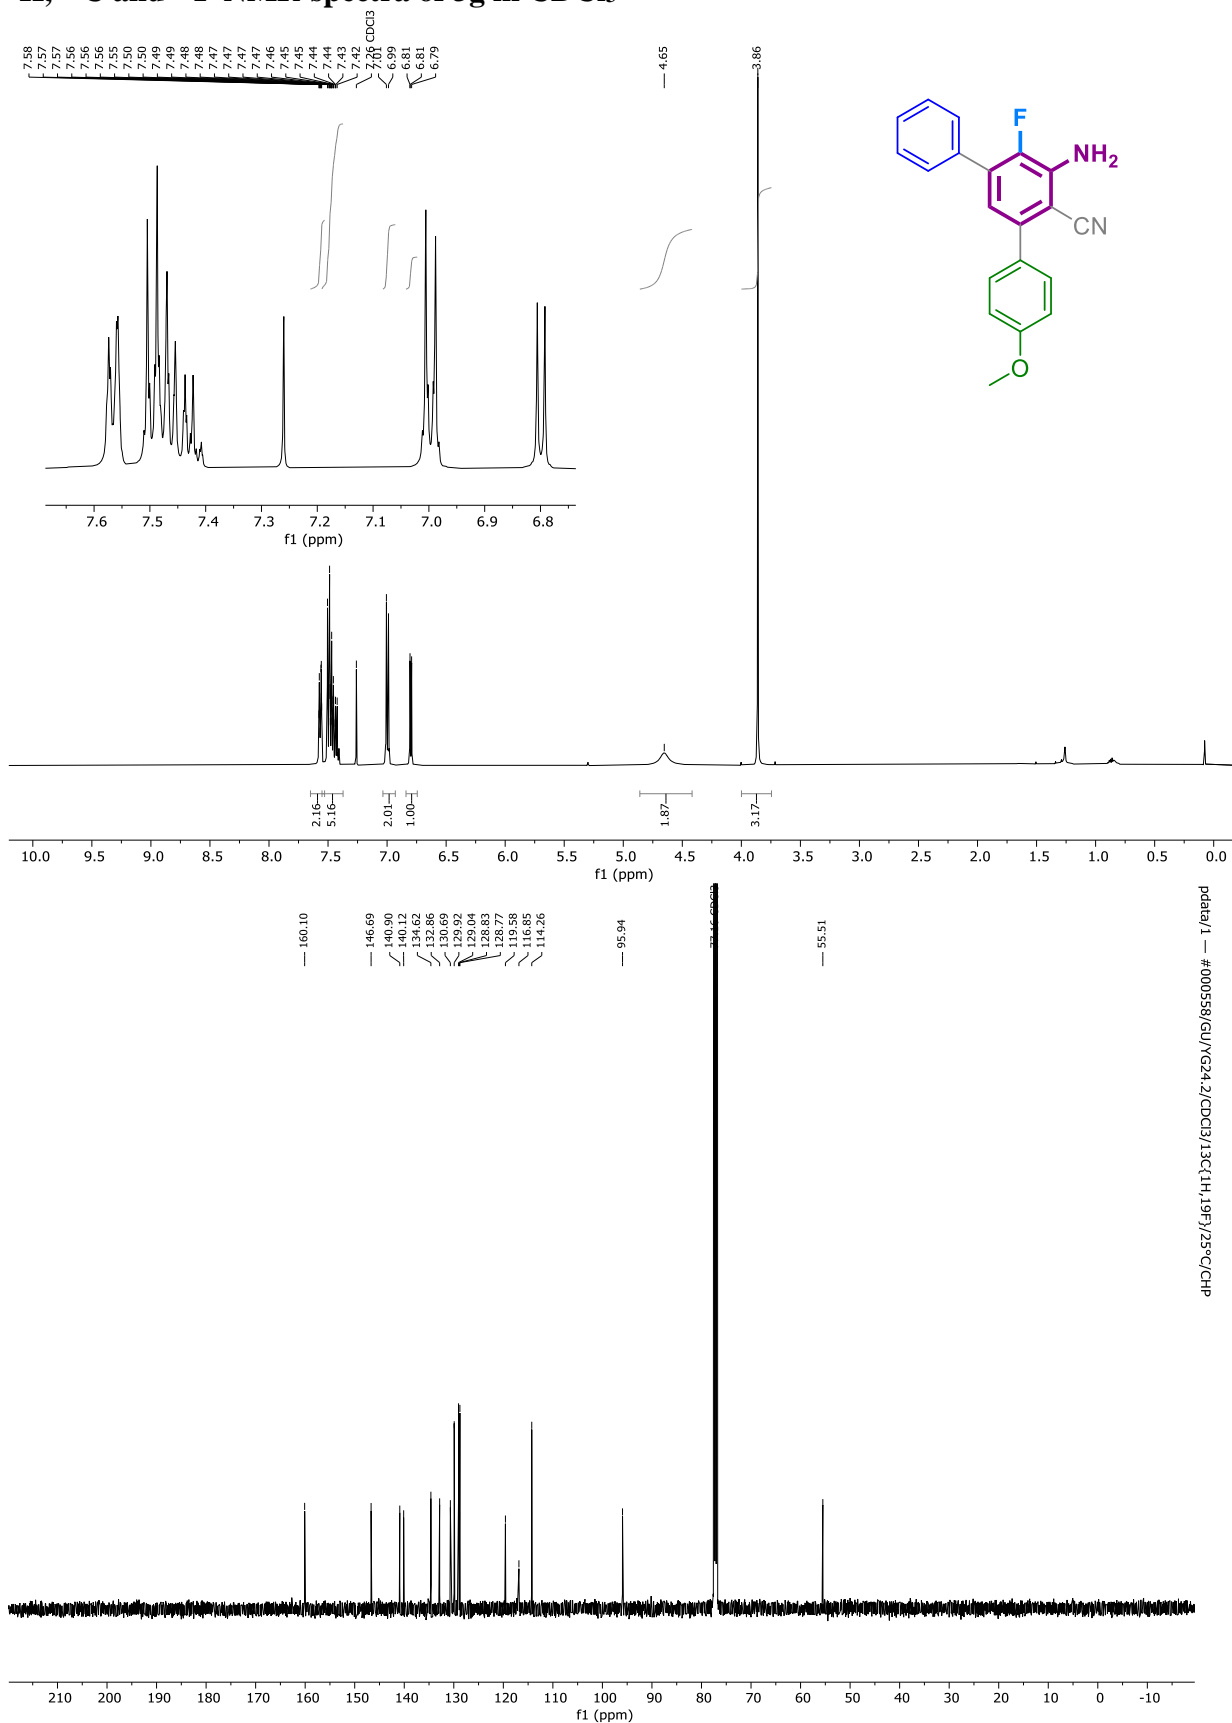

pdata/1 — #000558/GU/G24.2/CDCl3/1H/25°C/CHP

pdata/1 — #000558/GU/G24.2/CDCl3/13C(1H,19F)/25°C/CHP

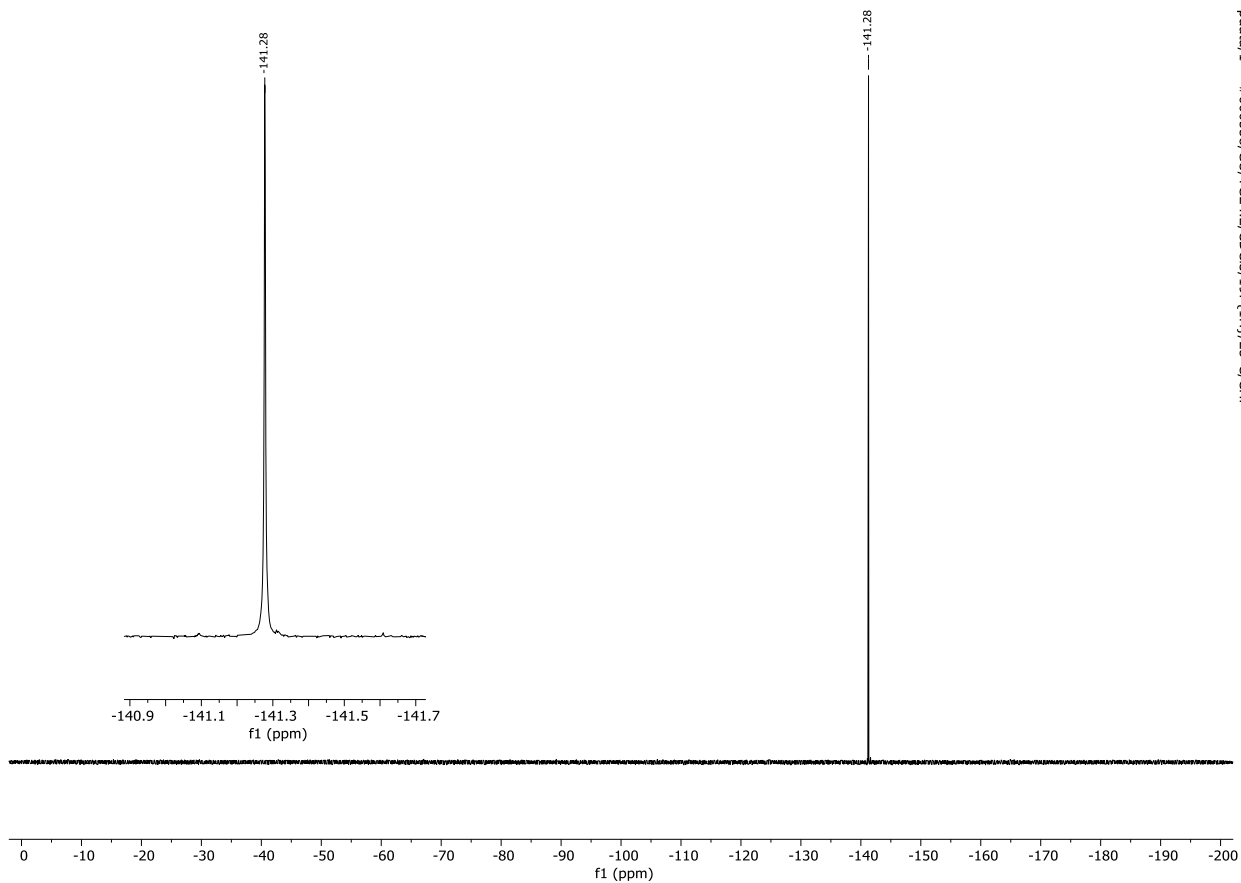

# <sup>1</sup>H, <sup>13</sup>C and <sup>19</sup>F-NMR-spectra of 3h in CDCl<sub>3</sub>

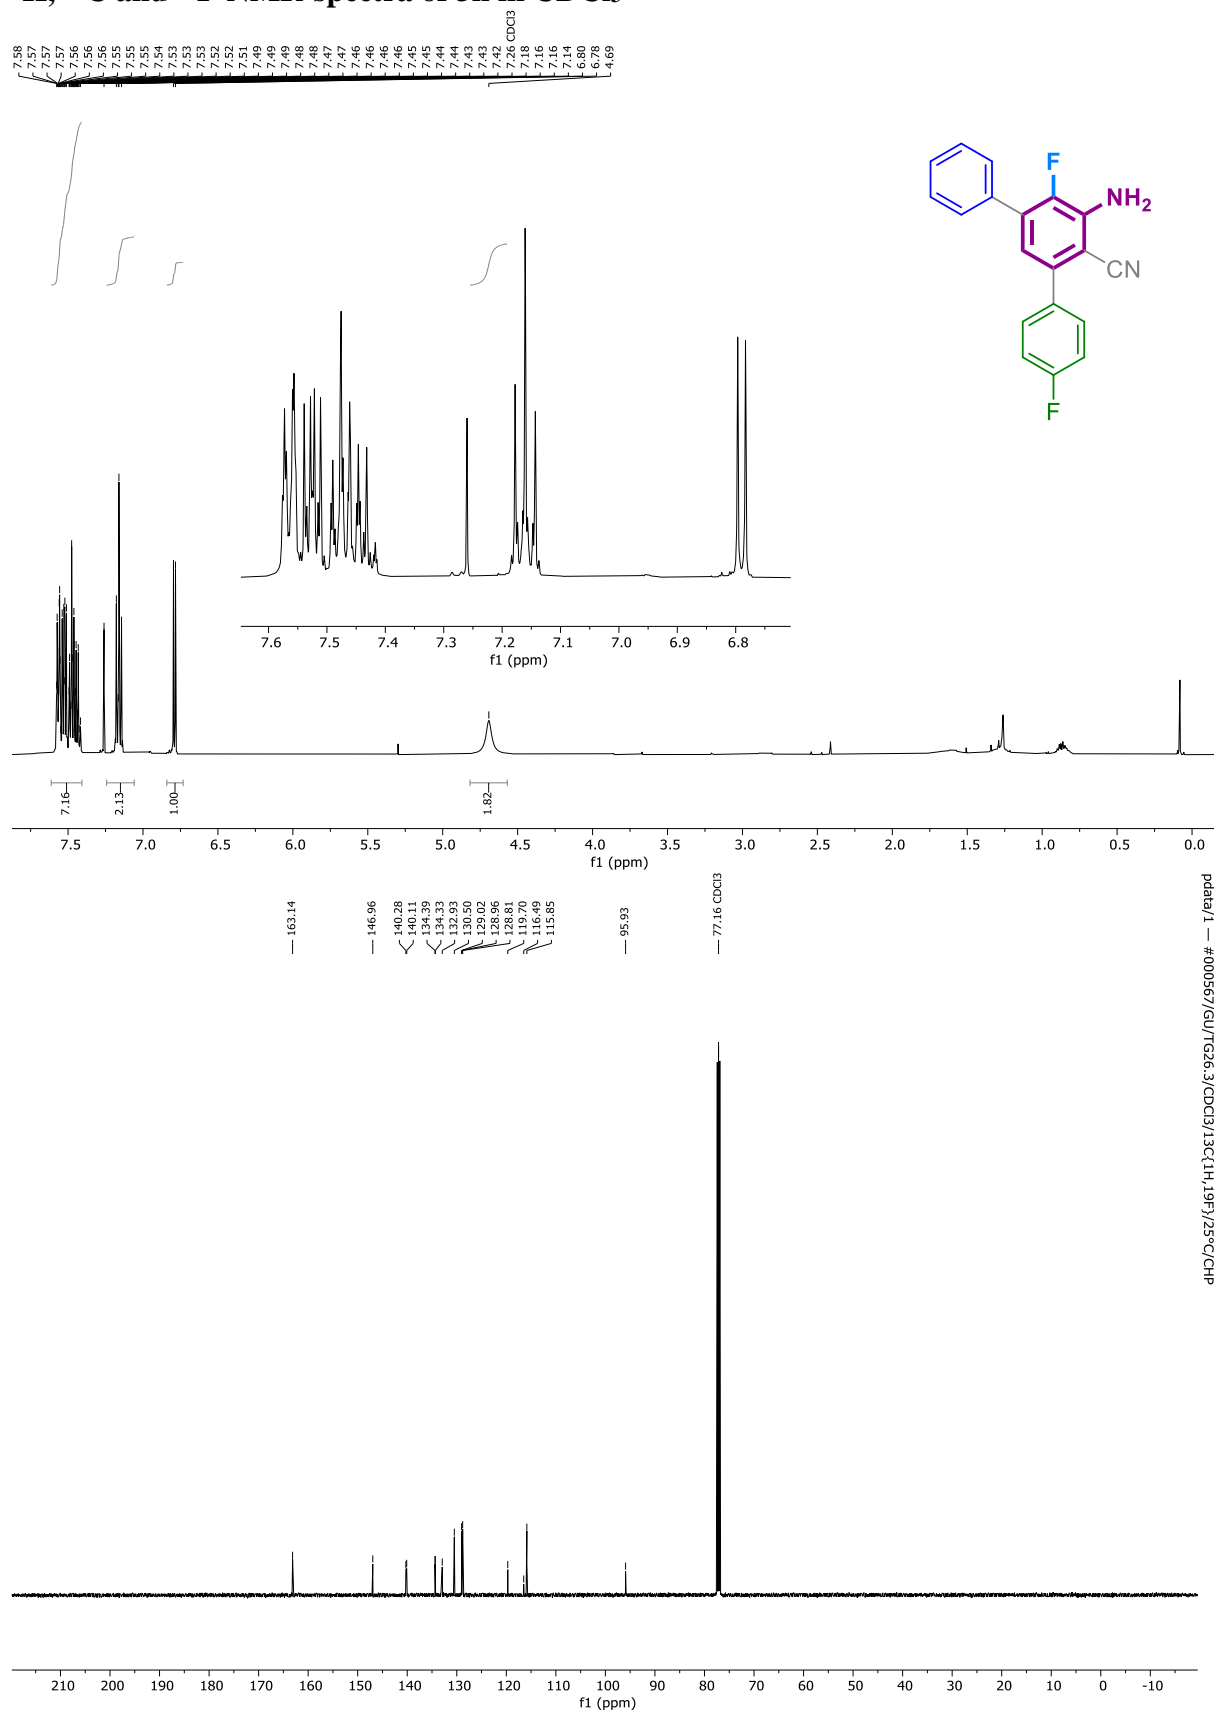

pdata/1 — #000567/GU/7G26.3/CDCl3/1H/25°C/CHP

pdata/1 — #000567/GU/7G26.3/CDCl3/13C(1H,19F)/25°C/CHP

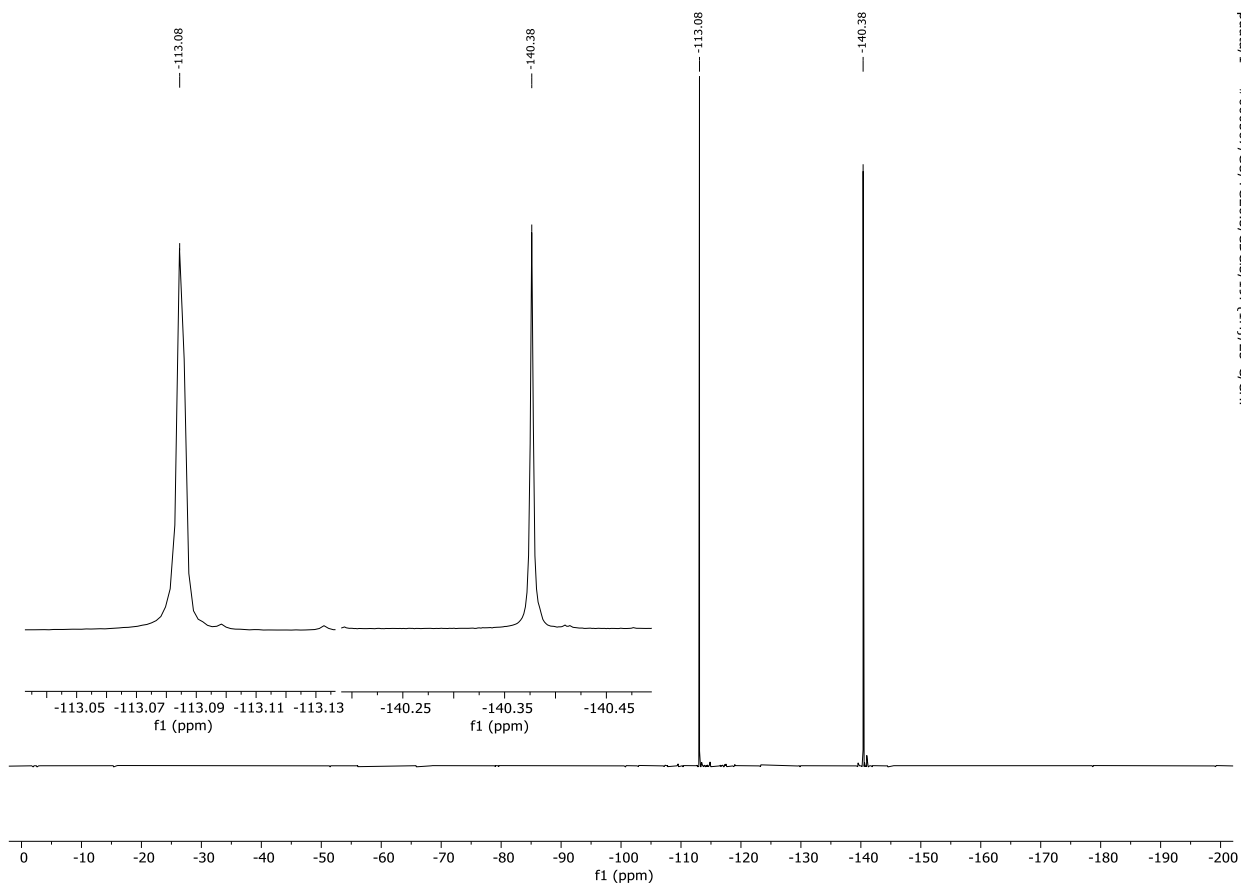

pdara1 — #000567/SU/TG26.3/CDCl3/19F(1H)/25°C/CHP



# $^1\text{H}$ , $^{13}\text{C}$ and $^{19}\text{F}$ -NMR-spectra of 3i in $\text{CDCl}_3$

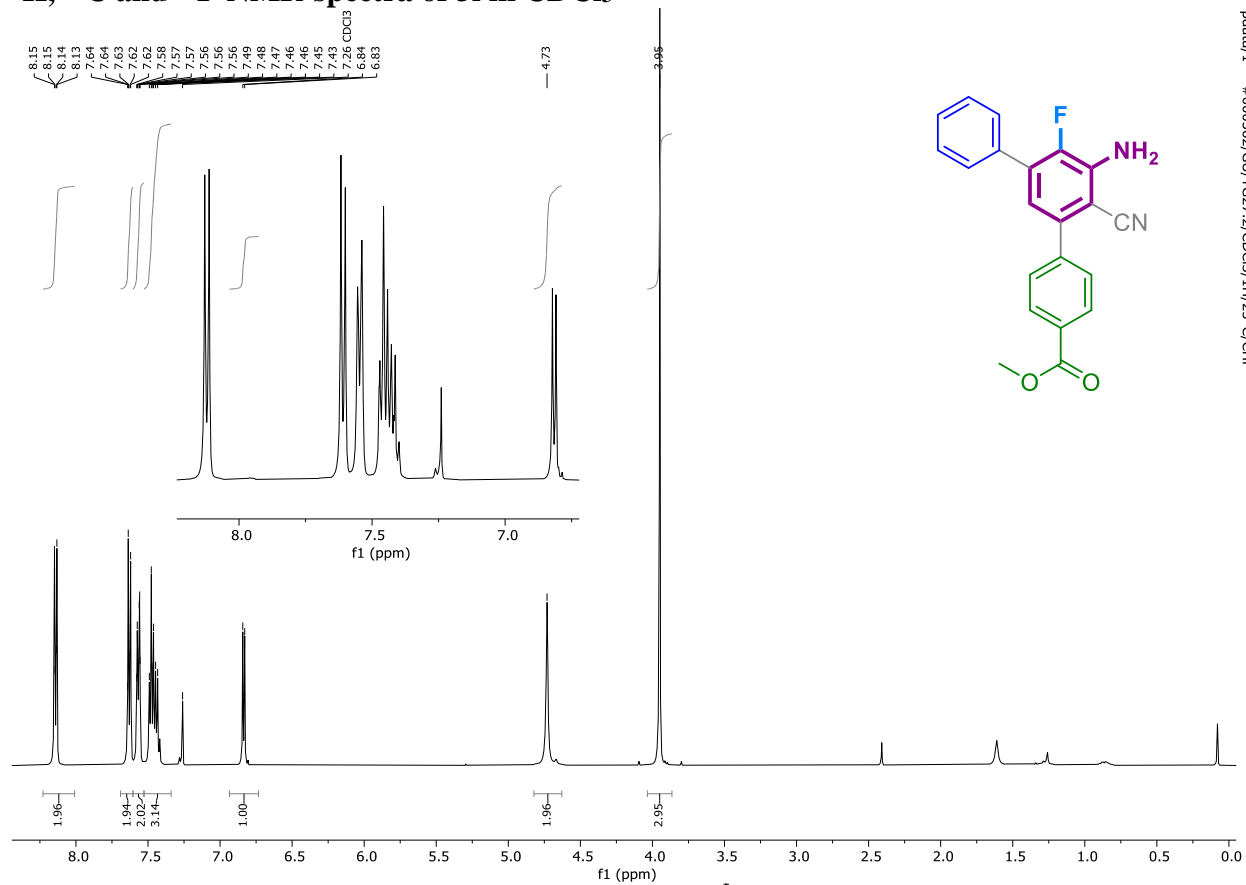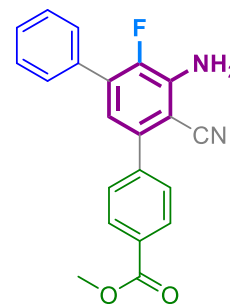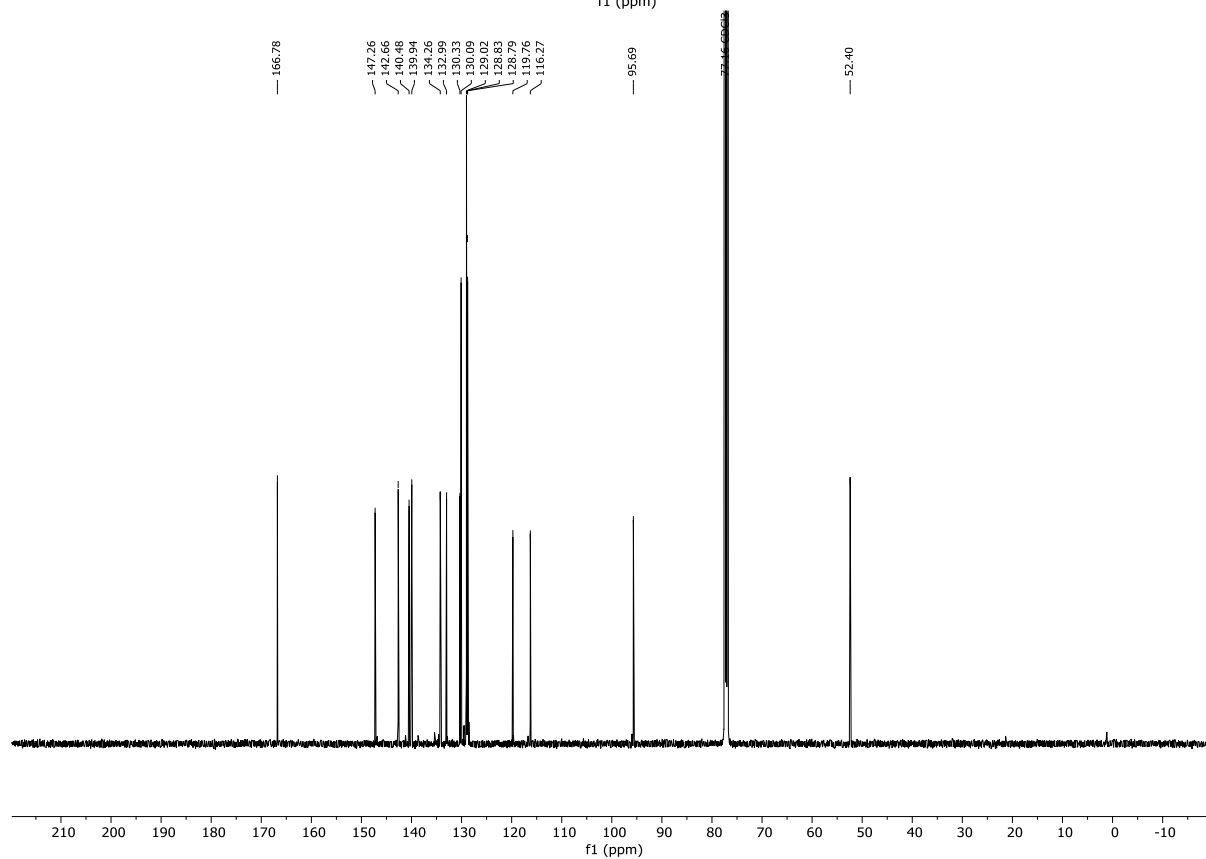

pdata/1 — #000562/GU/VSZ7.2/CDCl3/1H/25°C/CHP

pdata/1 — #000562/GU/VSZ7.2/CDCl3/13C(1H,19F)/25°C/CHP

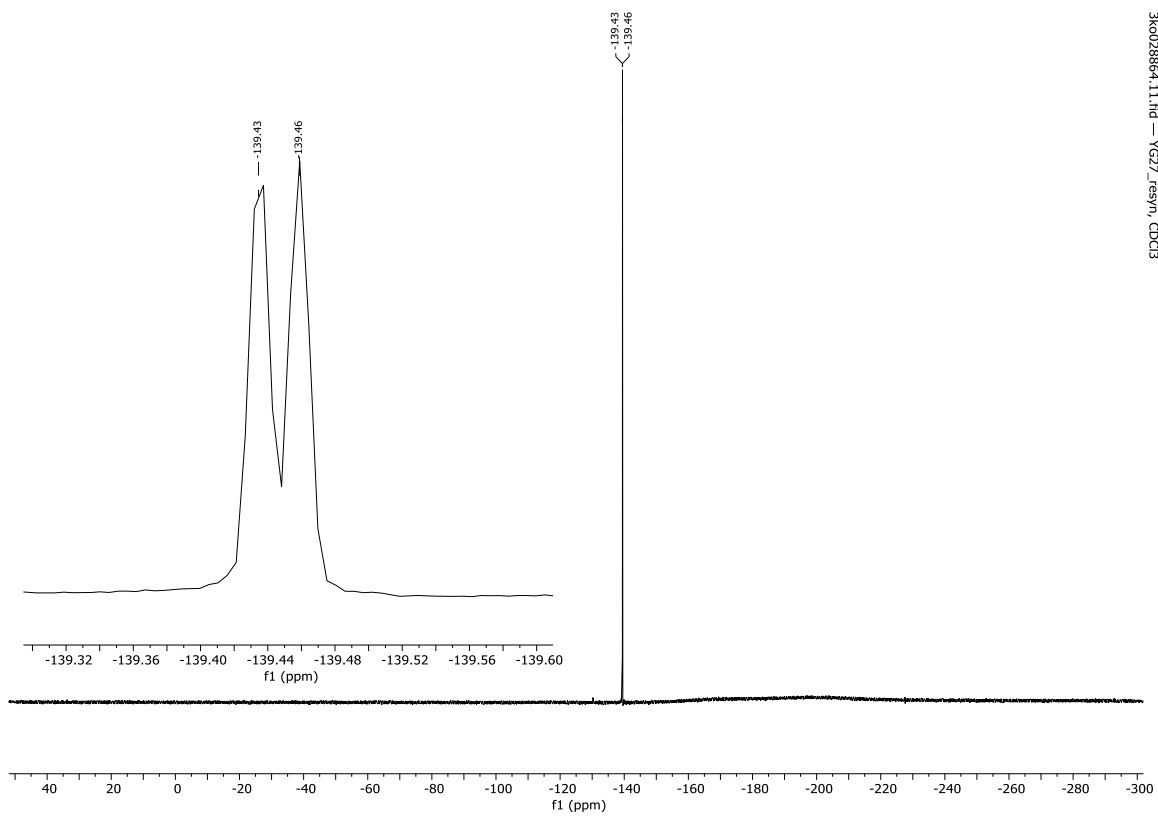

**$^1\text{H}$ ,  $^{13}\text{C}$  and  $^{19}\text{F}$ -NMR-spectra of **3j** in  $\text{CDCl}_3$**

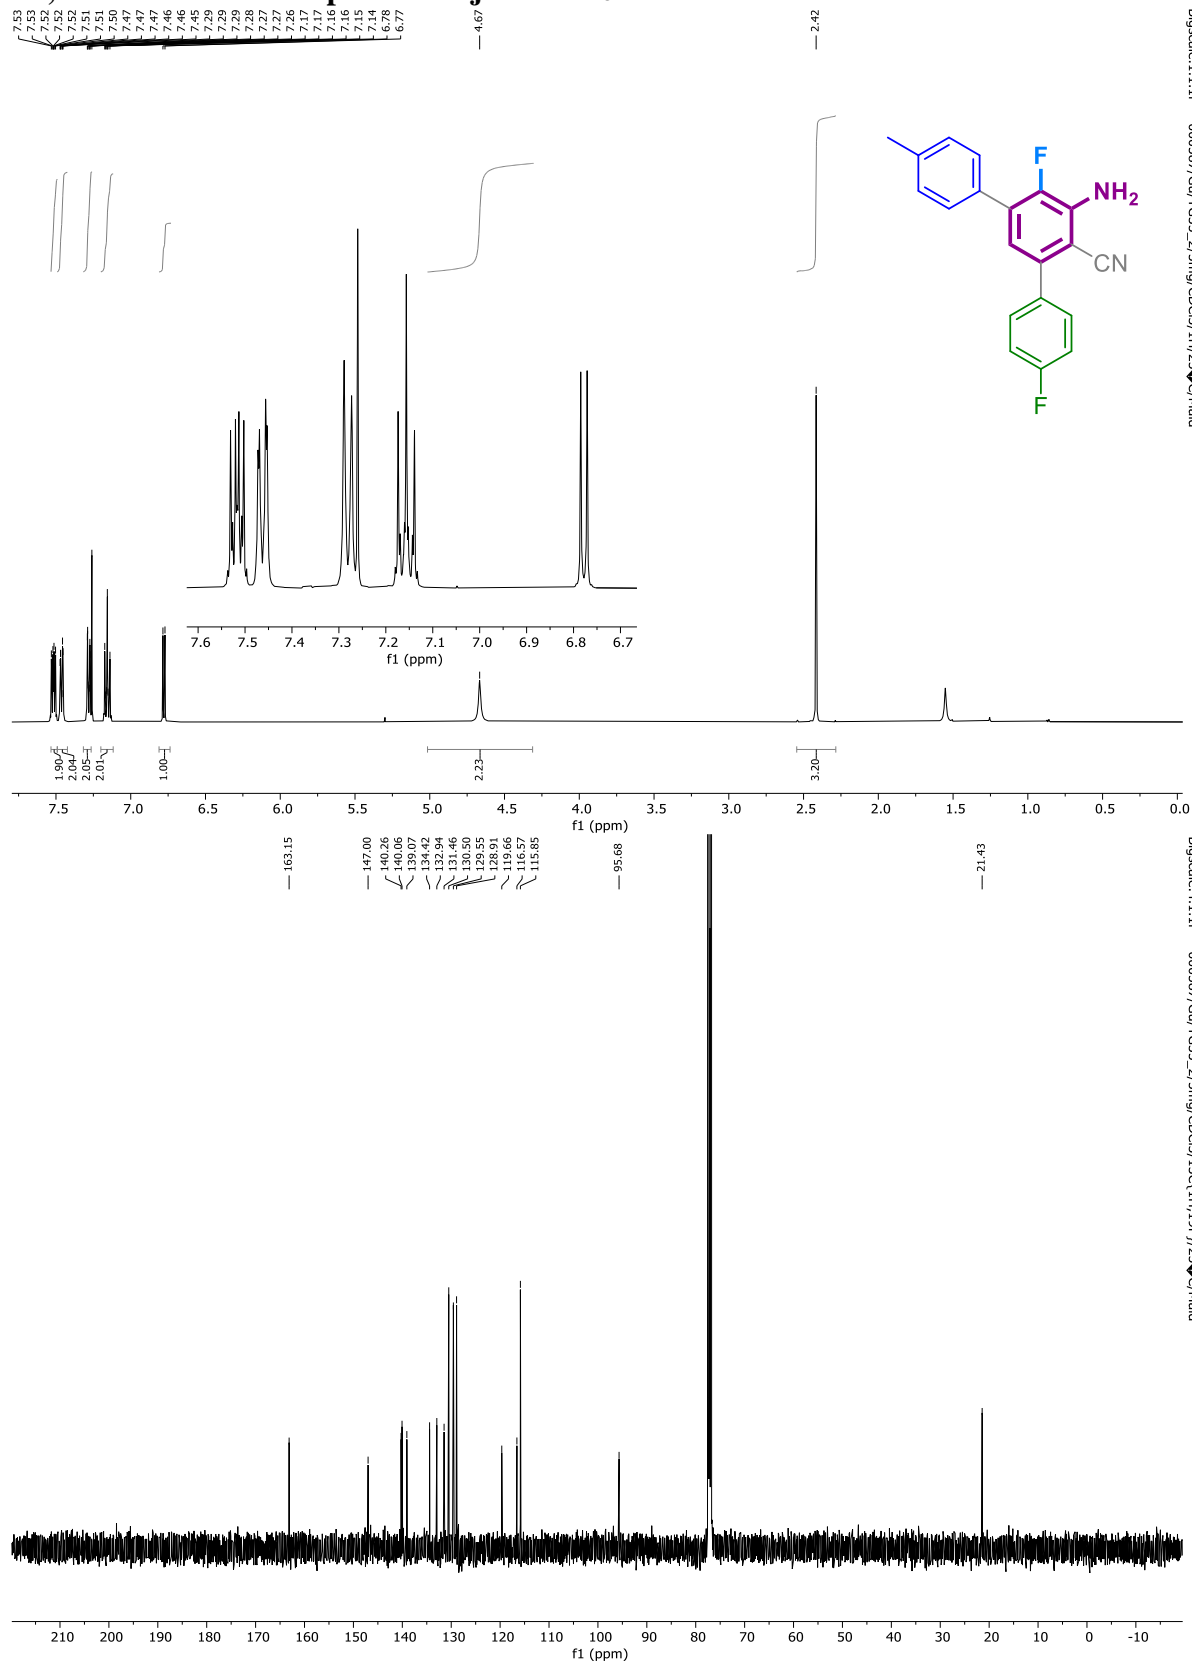

Bigscale 1.1.1f - 000587/Gu/CG35\_215mg/CDCl3/1H/25°C/maid

Bigscale 4.1.1f - 000587/Gu/CG35\_215mg/CDCl3/13C/1H,19F/25°C/maid

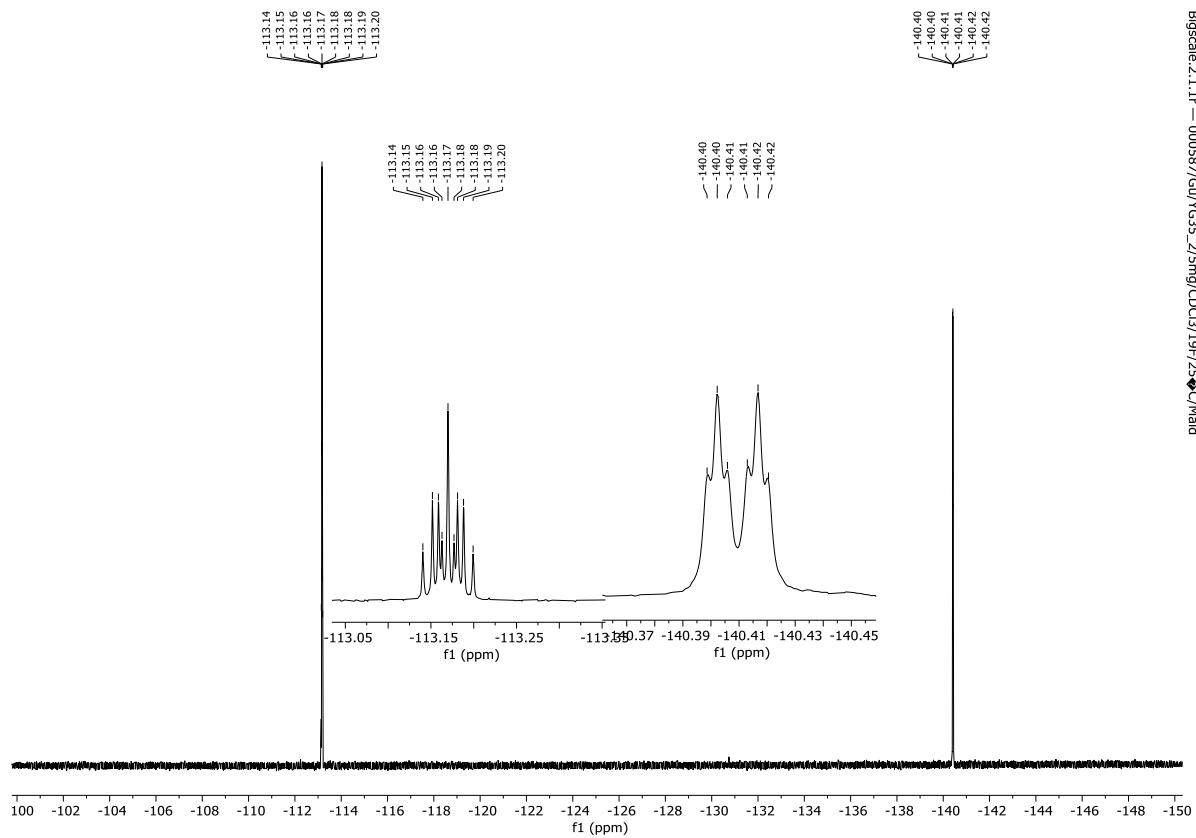

# $^1\text{H}$ , $^{13}\text{C}$ and $^{19}\text{F}$ -NMR-spectra of 5a in $\text{CDCl}_3$

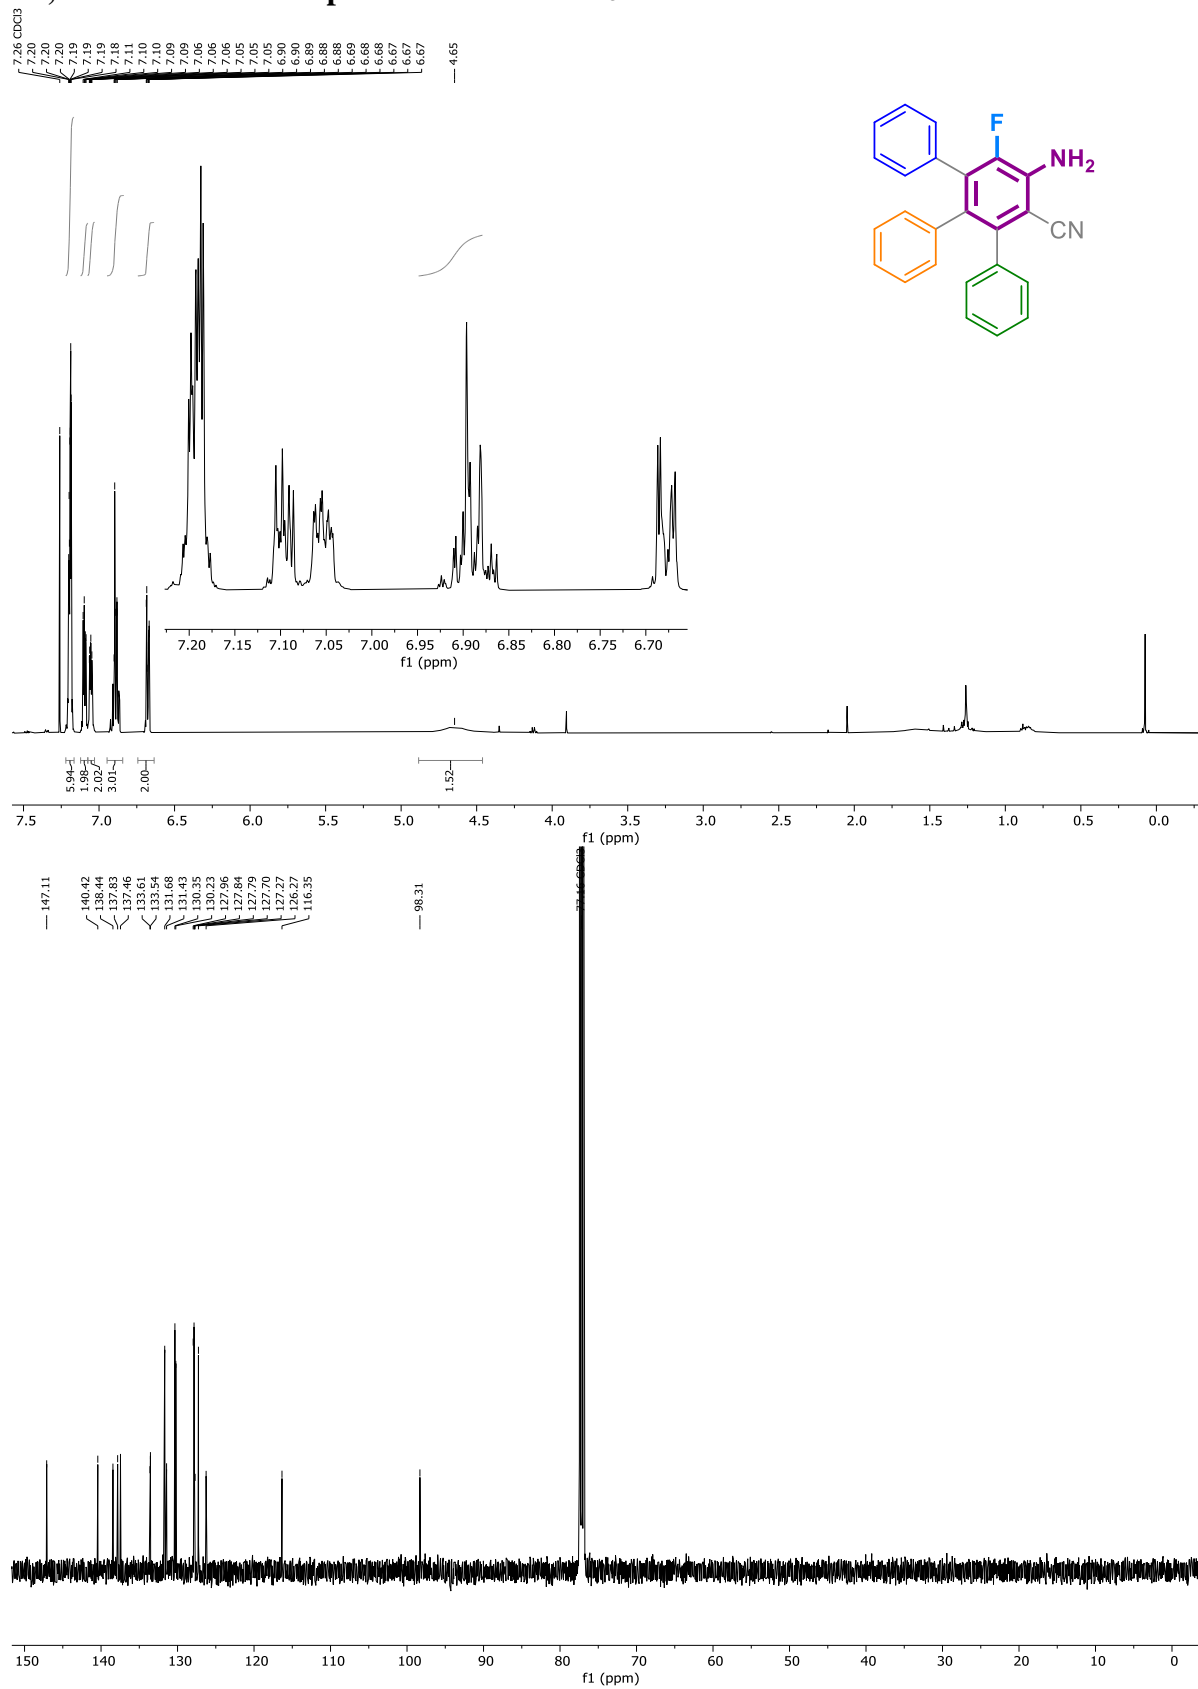

pdata1 — #000526/GRNU/8708/CDCl3/1H/25°C/HP

pdata1 — #000526/GRNU/8708/CDCl3/13C/1H/19F/25°C/HP

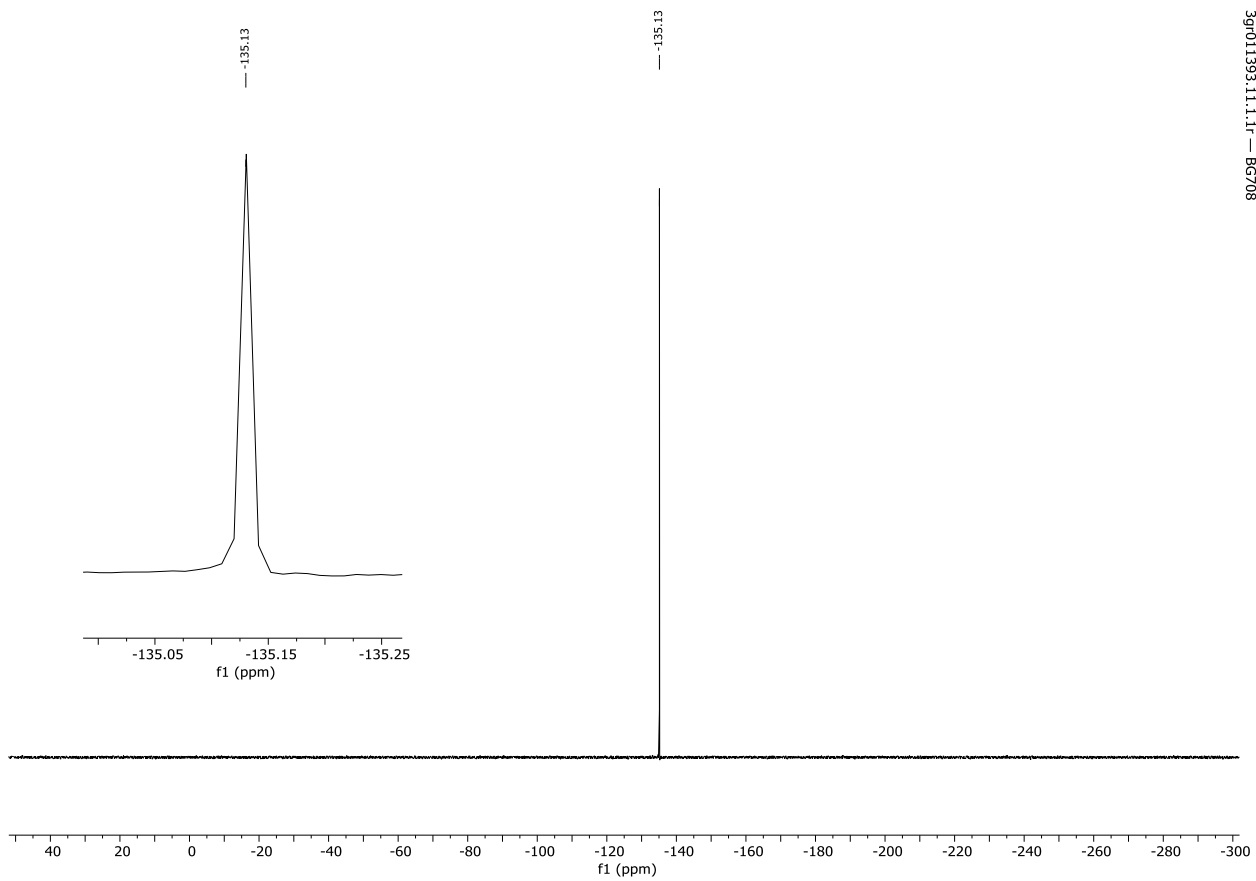

# <sup>1</sup>H, <sup>13</sup>C and <sup>19</sup>F-NMR-spectra of 5b in CDCl<sub>3</sub>

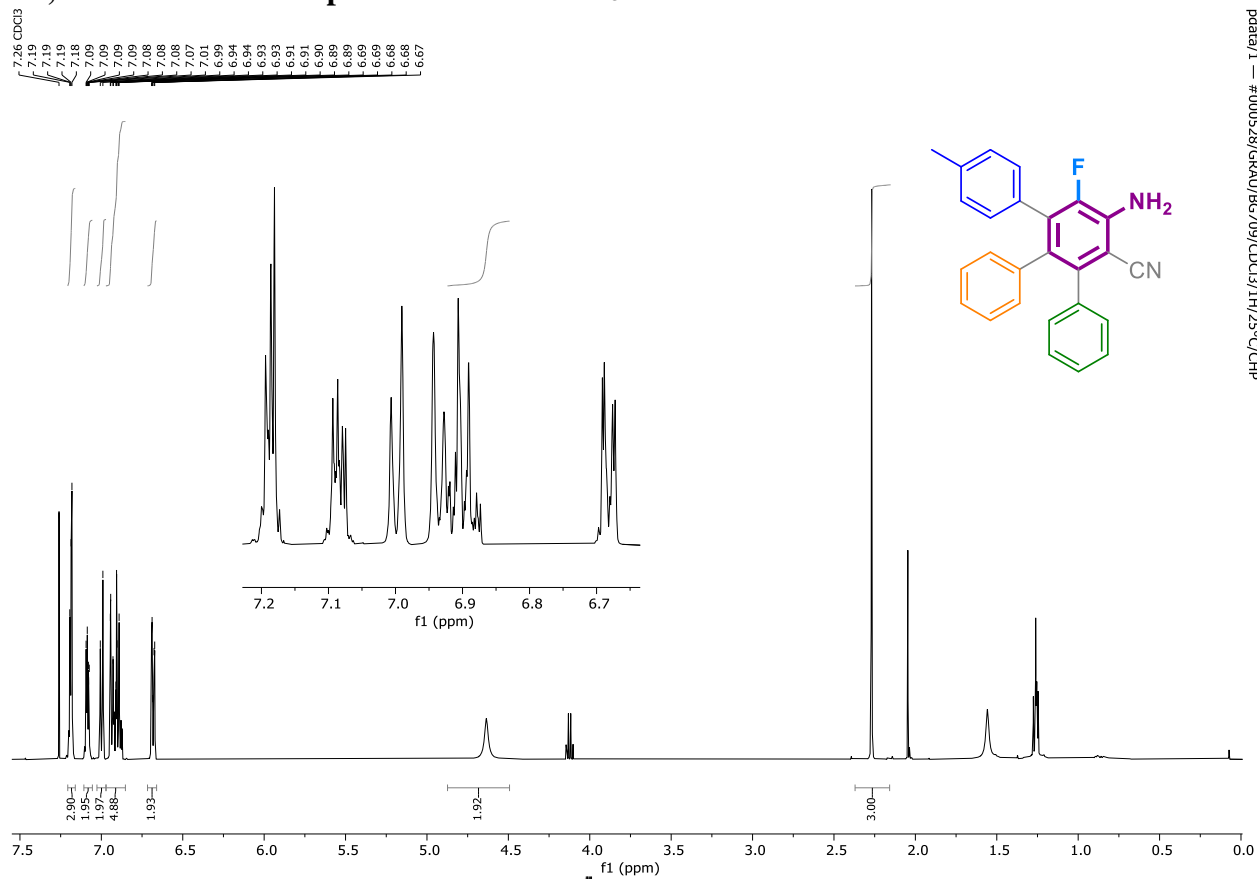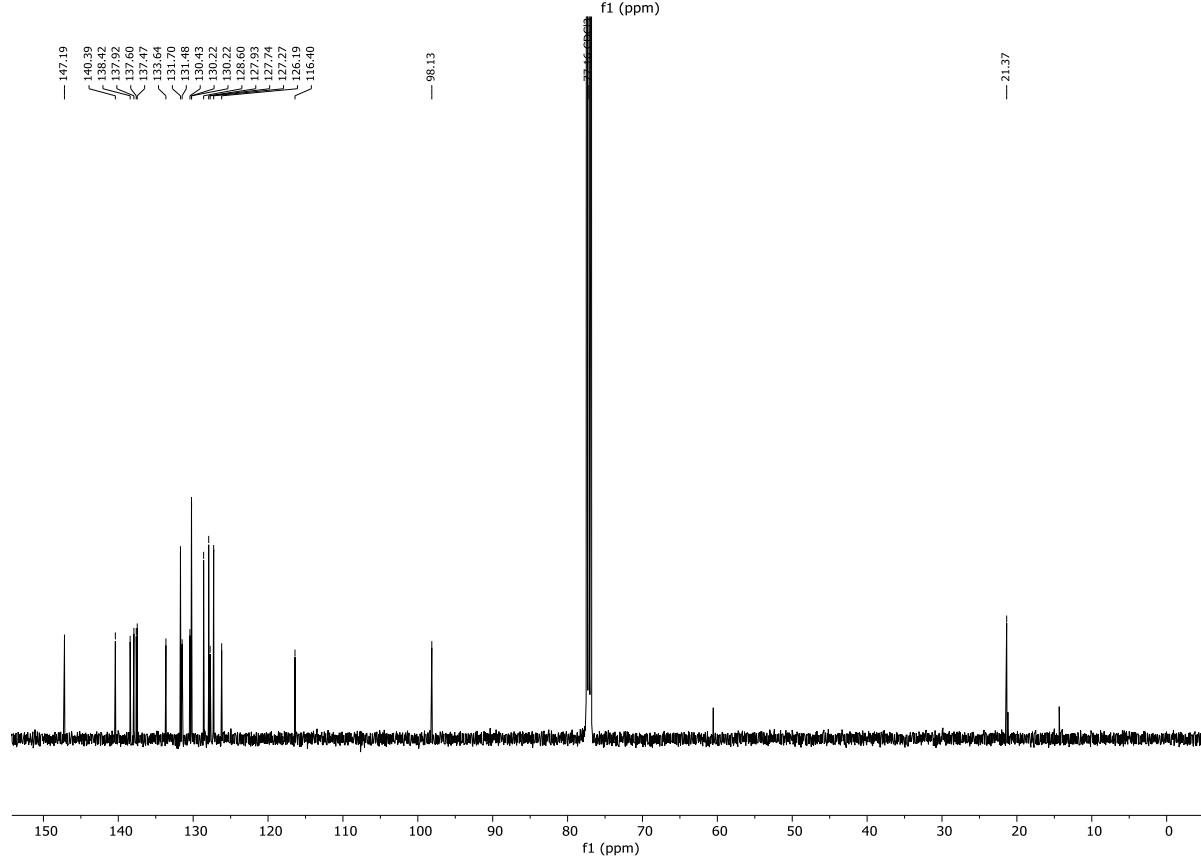

pdata1/1 — #000528/GRAU/86709/CDCl3/1H/25°C/CHP

pdata1/1 — #000528/GRAU/86709/CDCl3/13C(1H,19F)/25°C/CHP

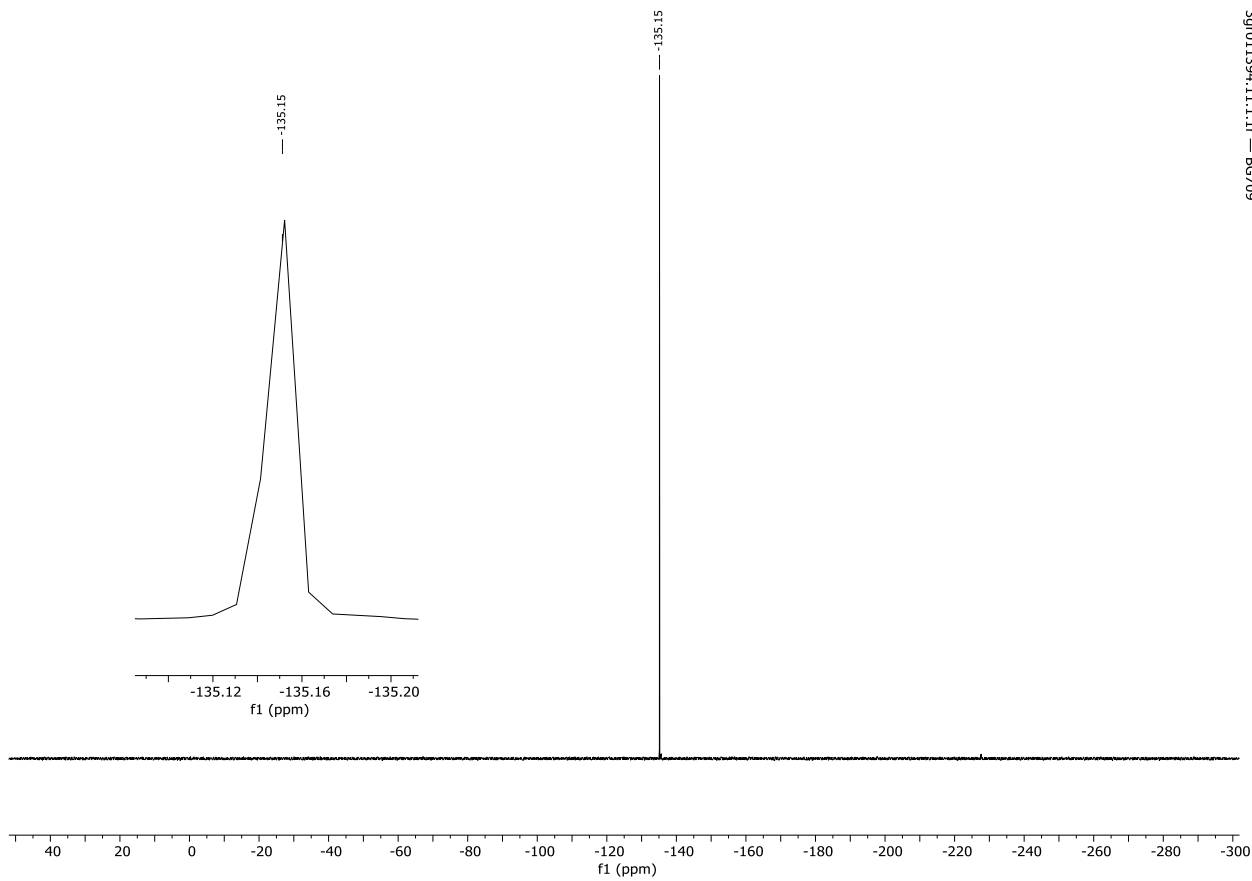



# $^1\text{H}$ , $^{13}\text{C}$ and $^{19}\text{F}$ -NMR-spectra of 5c in $\text{CDCl}_3$

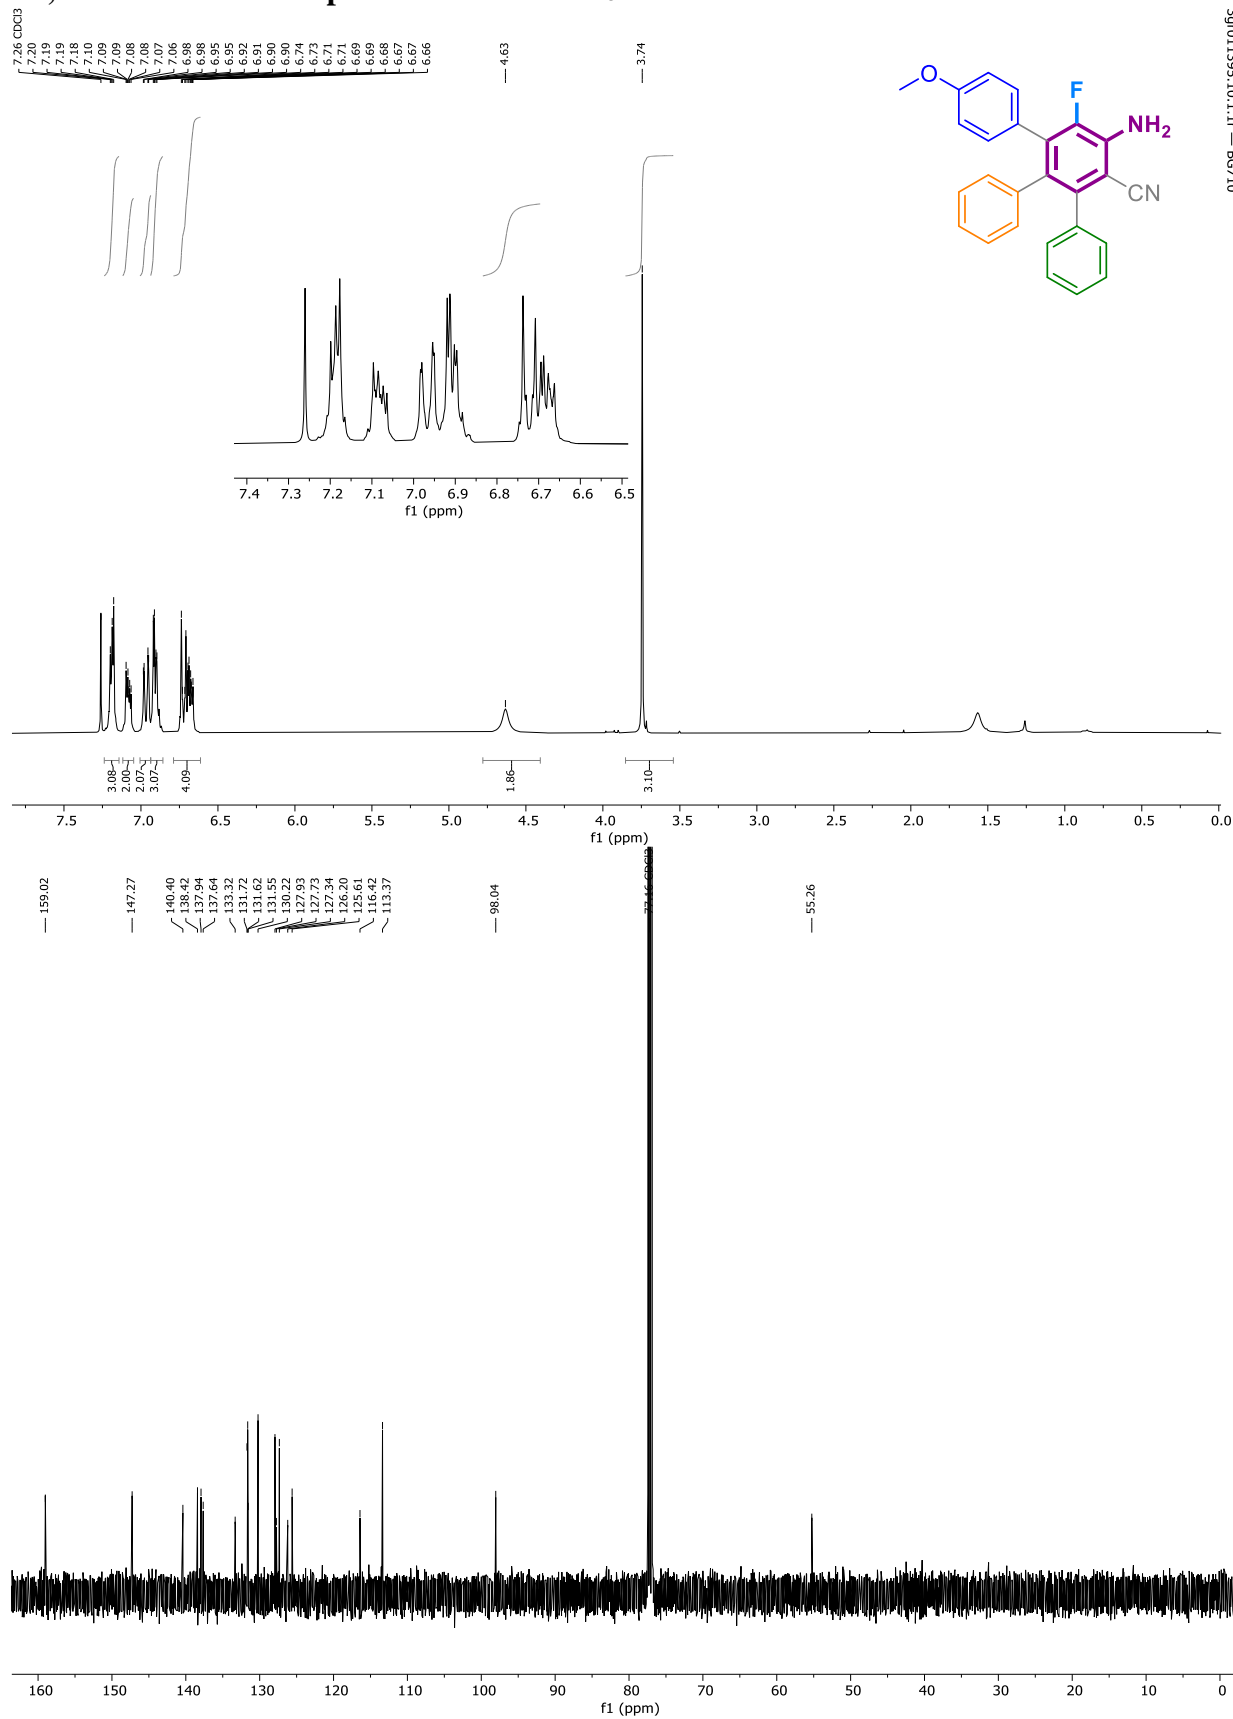

3g011395.10.1.1r - BG710

pdata1 - #000521/GRAU/BG710/CDCl3/13C(1H,19F)/25°C/HP

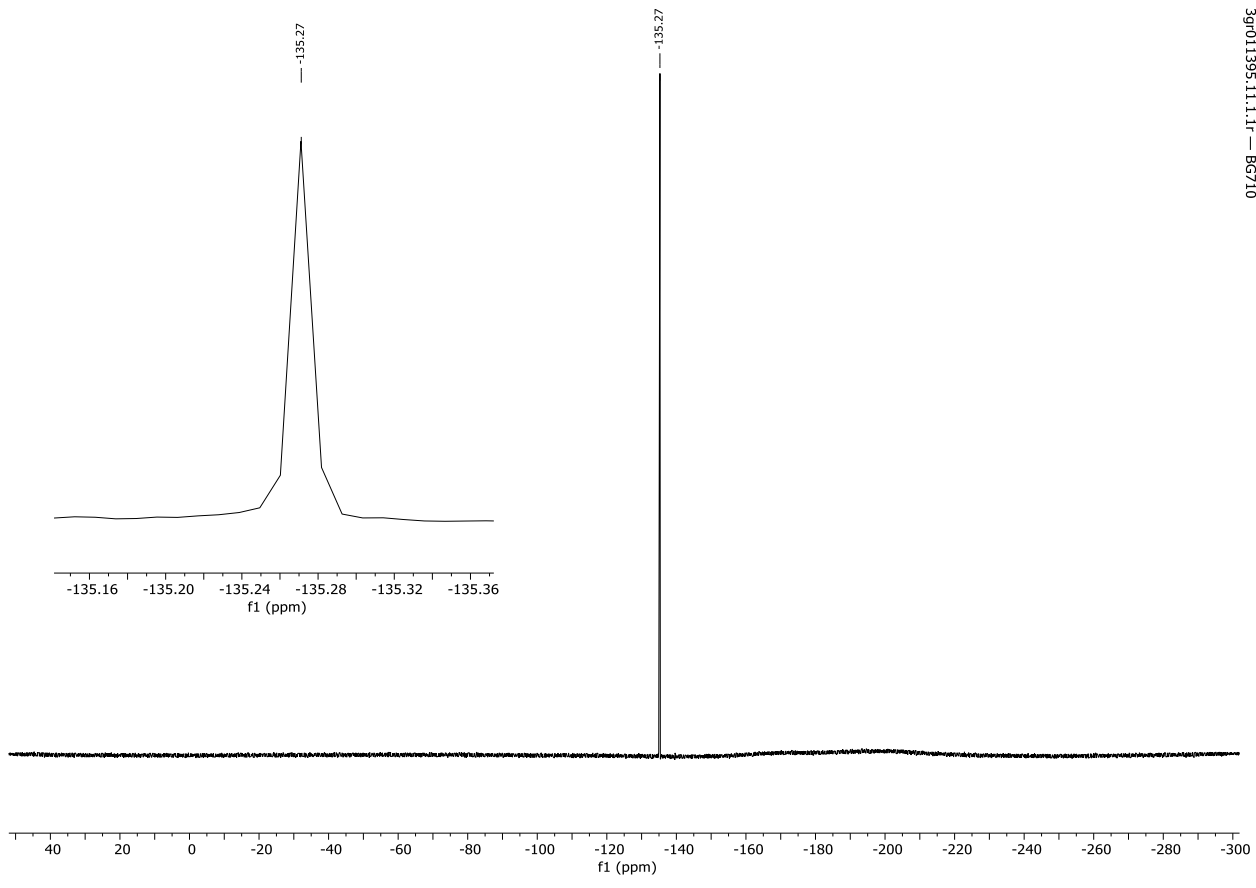

**<sup>1</sup>H, <sup>13</sup>C and <sup>19</sup>F-NMR-spectra of 5d in CDCl<sub>3</sub>**

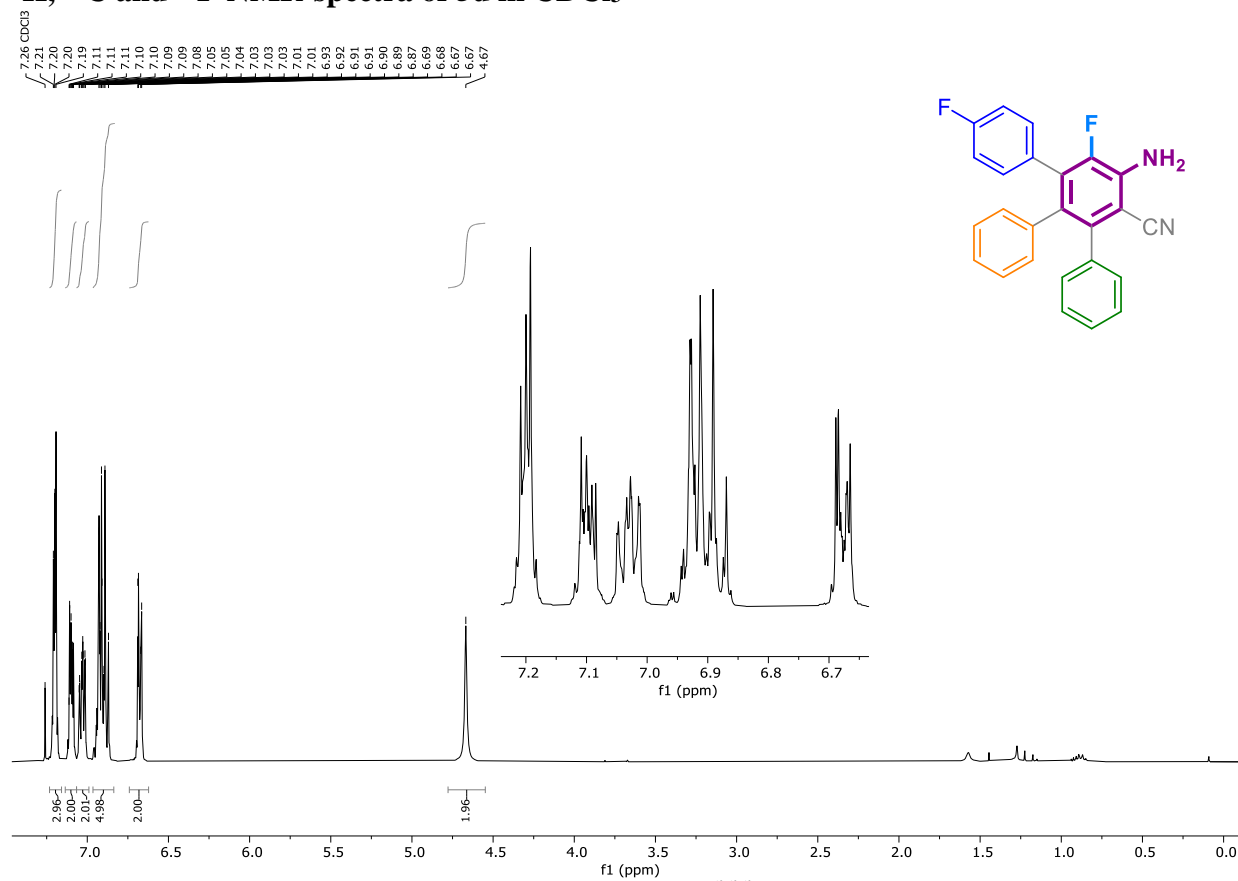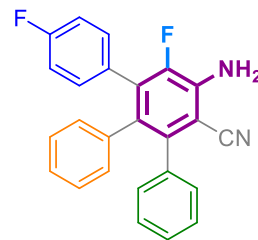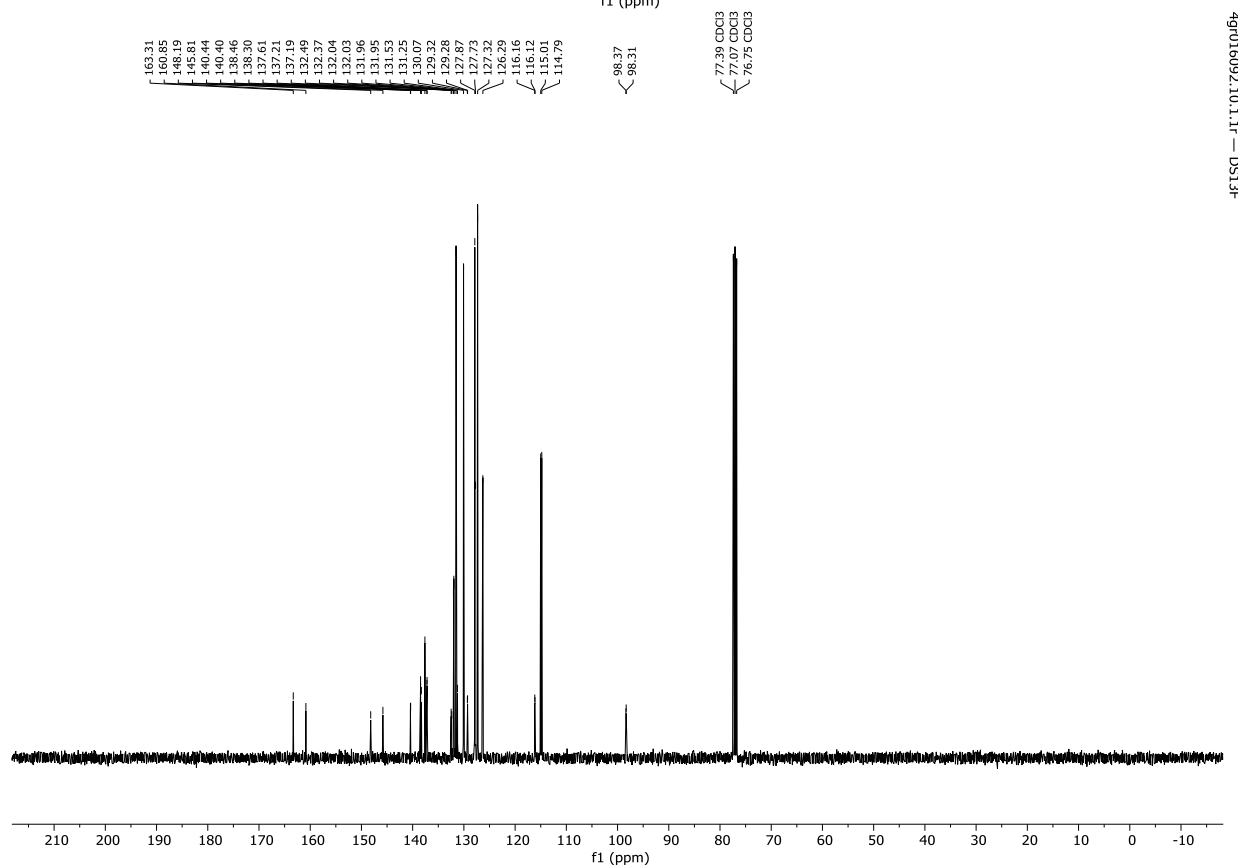

49f016078.10.1.f1 - DS13F

49f016092.10.1.f1 - DS13F

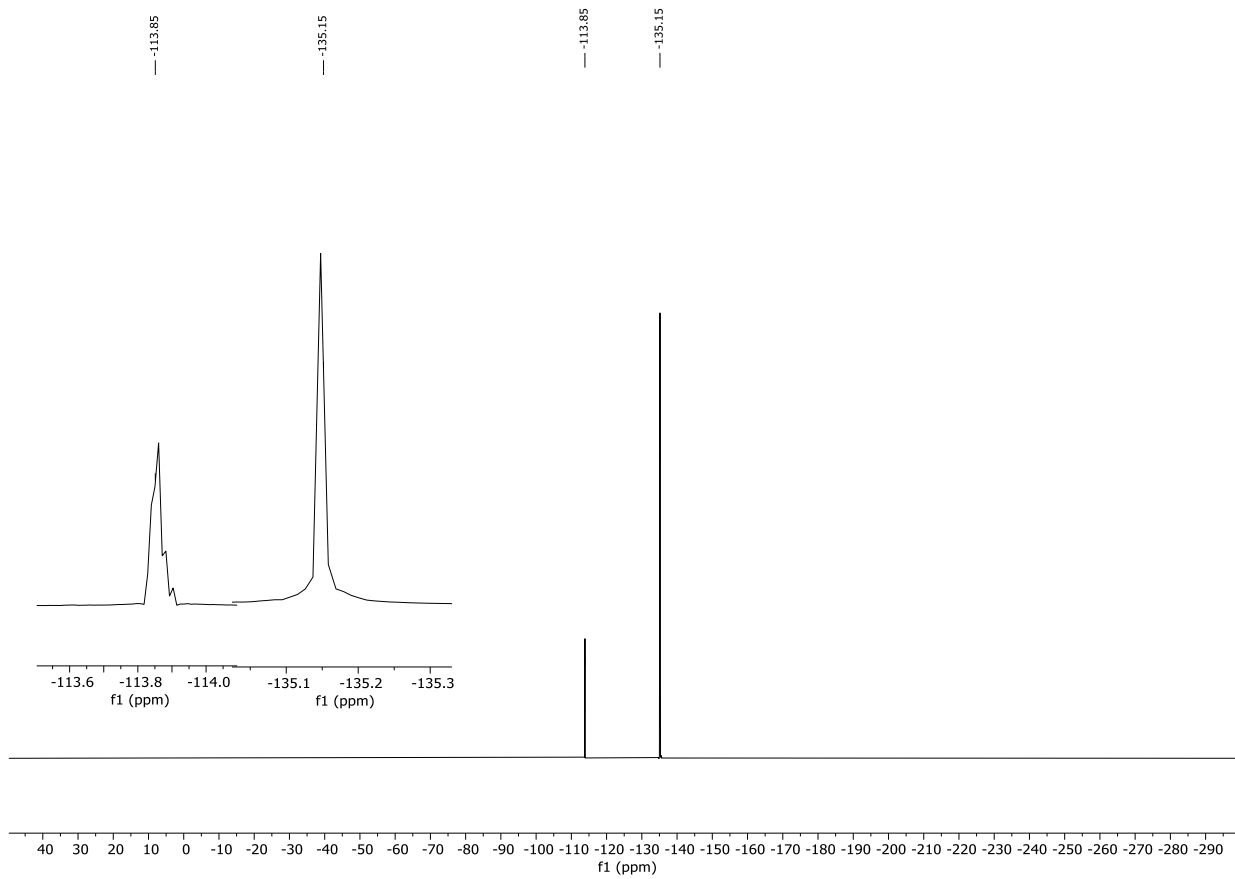

49016078.11.11.F - DS13F

# $^1\text{H}$ , $^{13}\text{C}$ and $^{19}\text{F}$ -NMR-spectra of 5e in $\text{CDCl}_3$

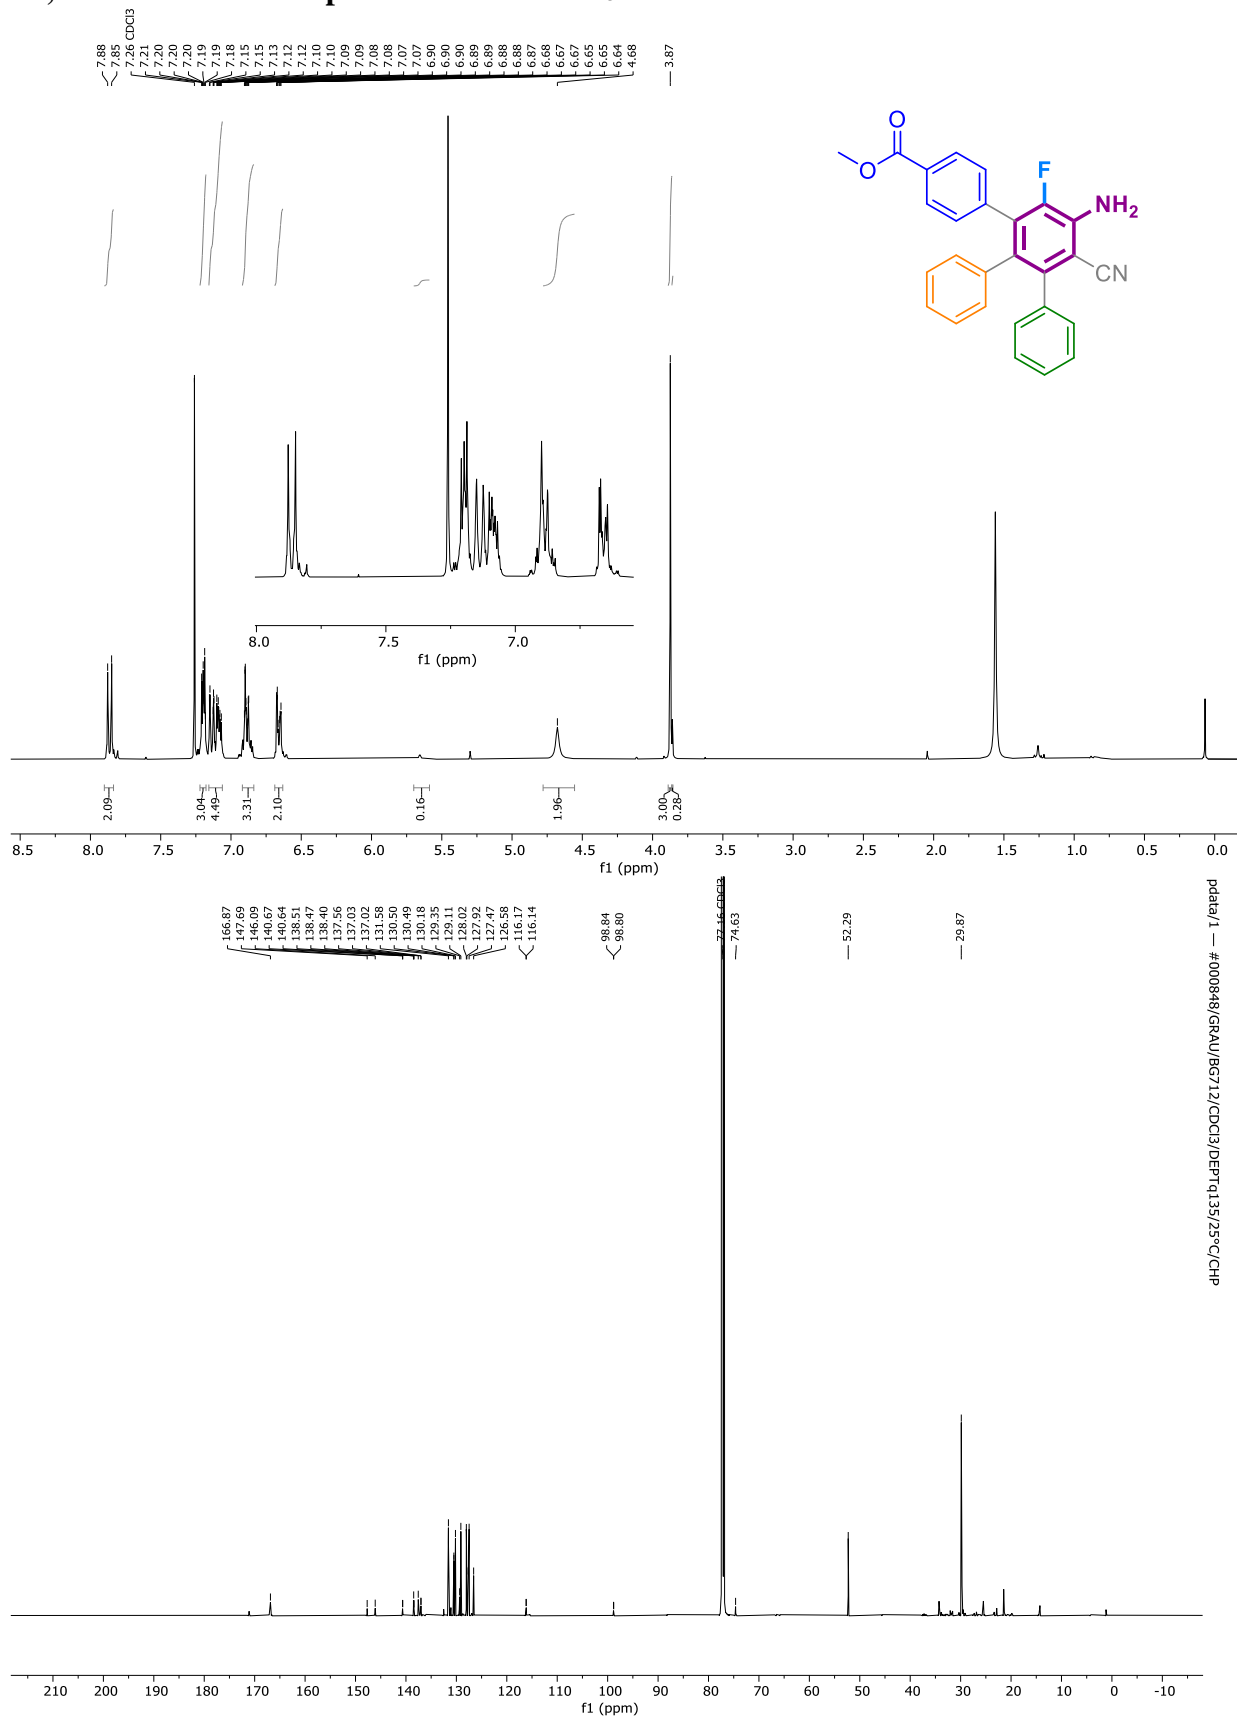

39f011442.10.1.f1 - BG712

pdata/1 - #000848/GRAU/BG712/CDCl3/DEPT135/25°C/CHP

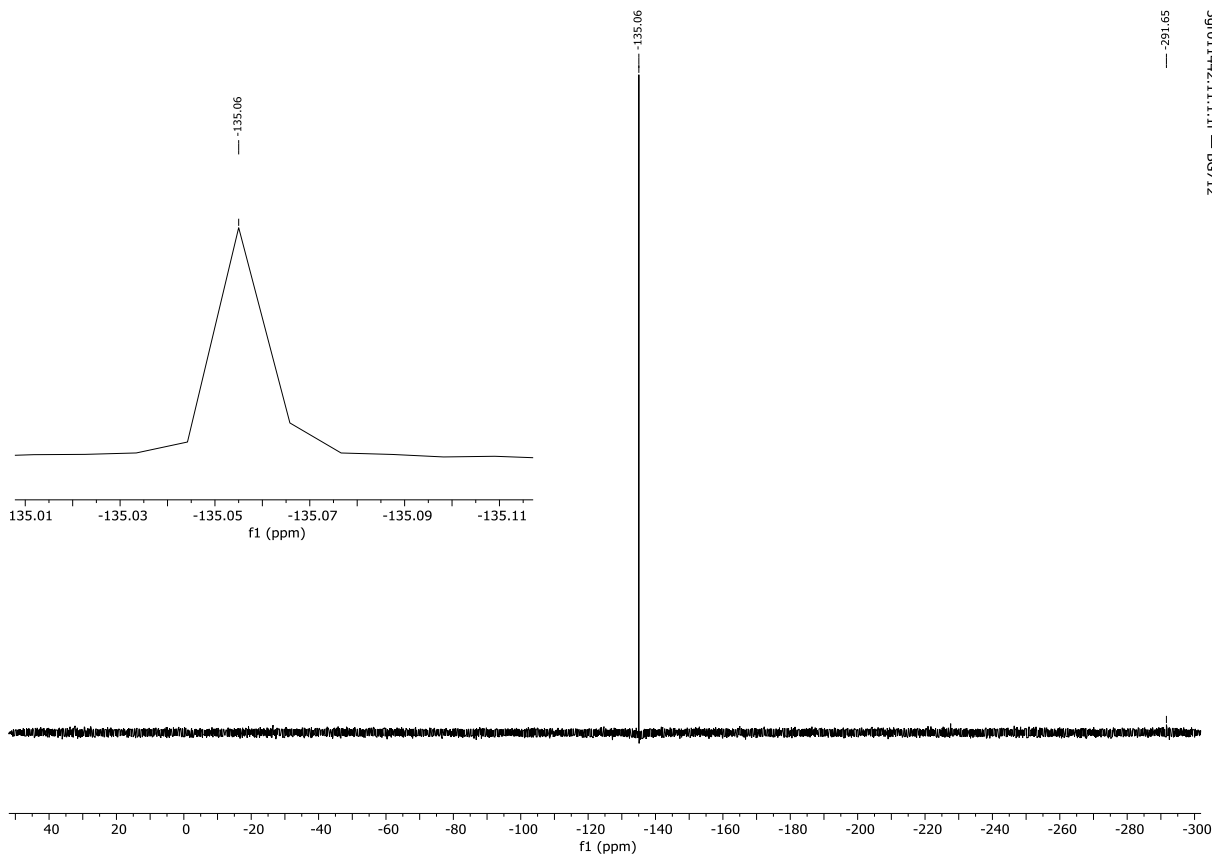

**$^1\text{H}$ ,  $^{13}\text{C}$  and  $^{19}\text{F}$ -NMR-spectra of 5f in  $\text{CDCl}_3$**

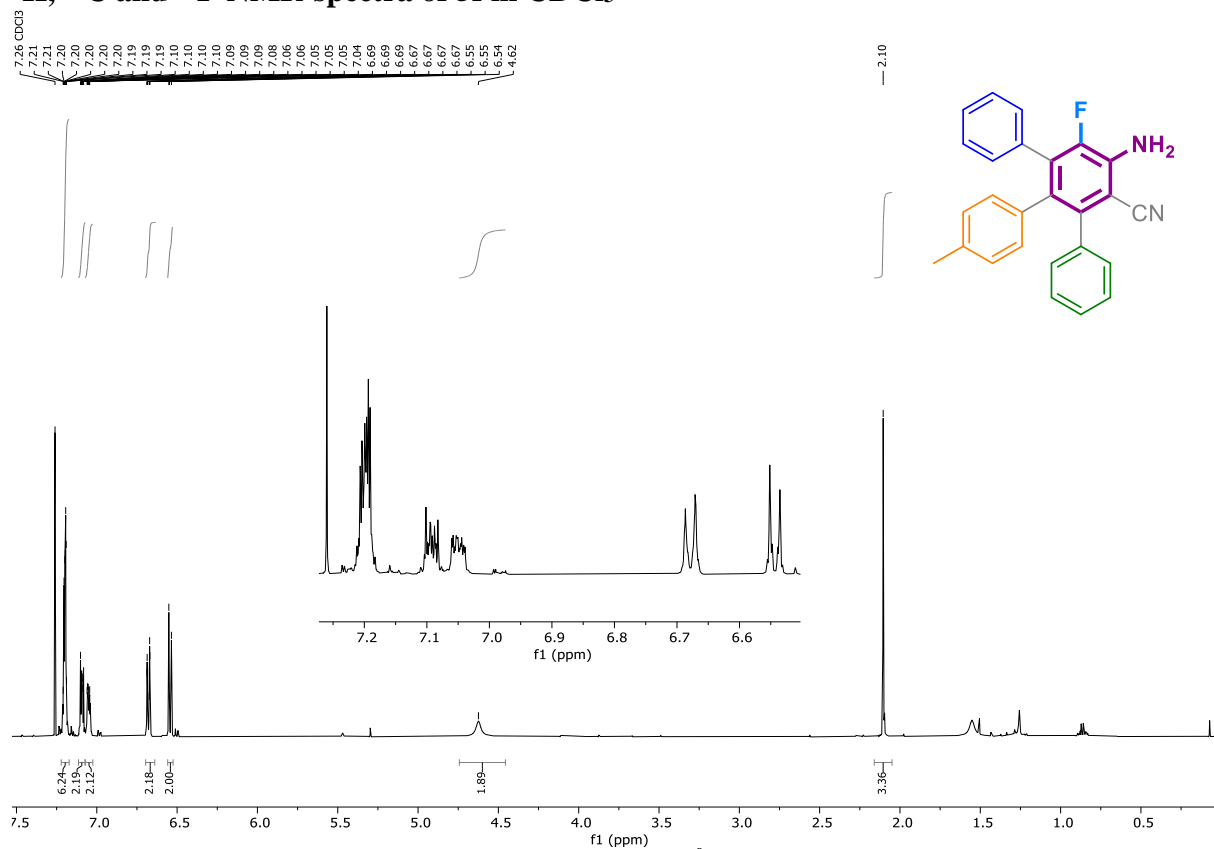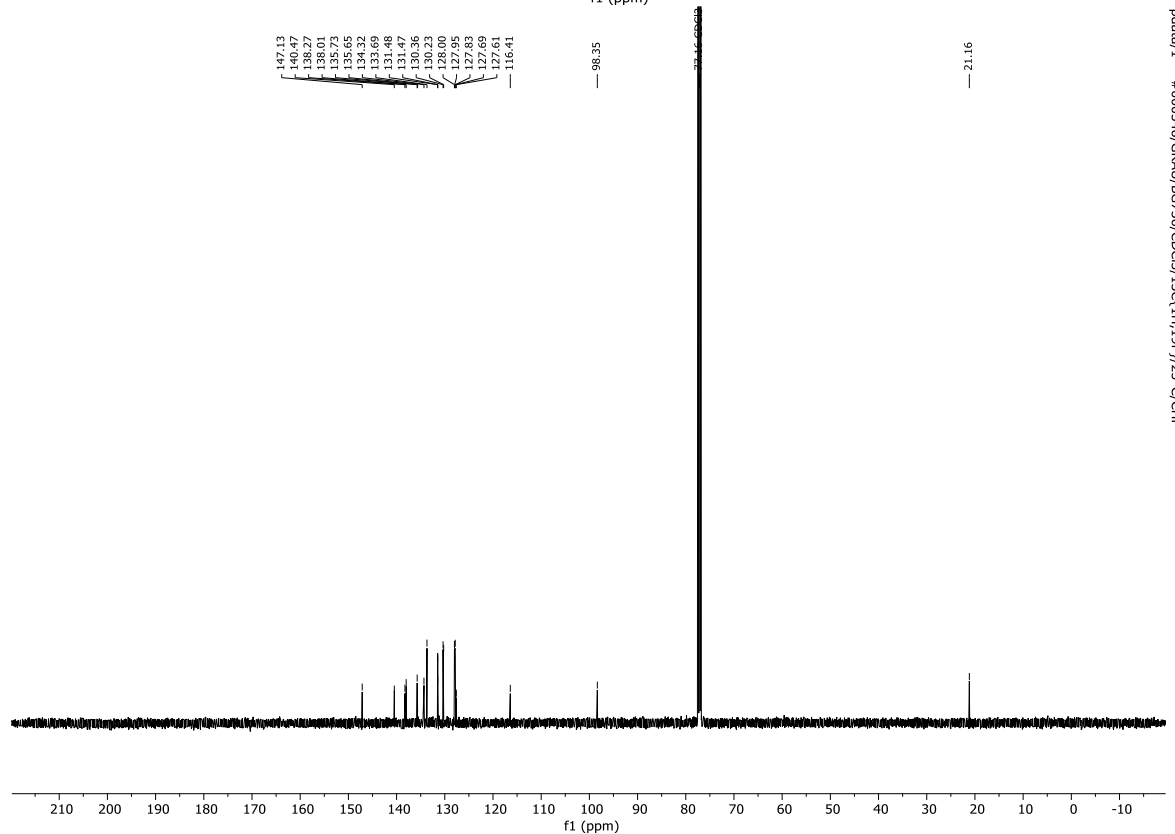

pdata1\_1 — #000546/GR4U/BG736/CDCl3/1H/25°C/CHP

pdata1\_1 — #000546/GR4U/BG736/CDCl3/13C/1H,19F/25°C/CHP

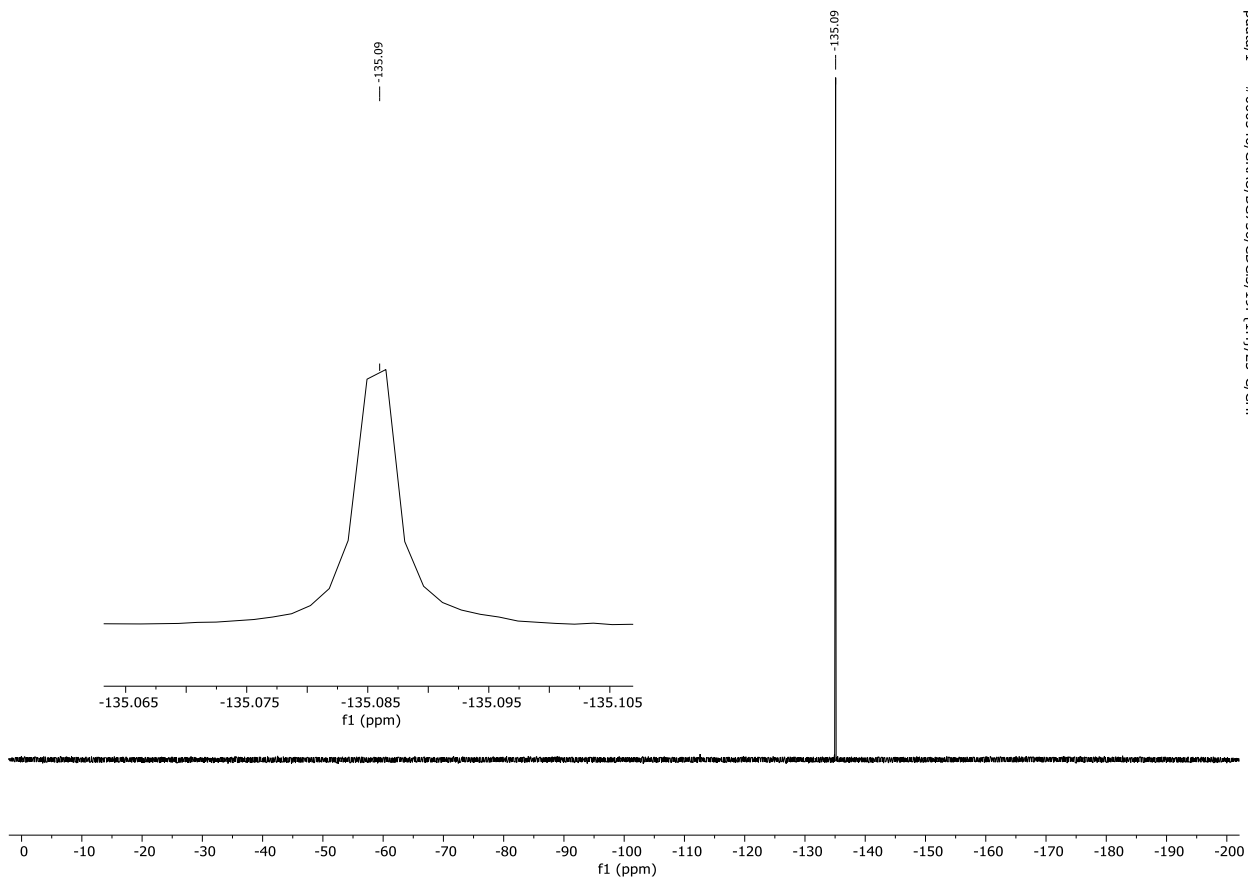



# <sup>1</sup>H, <sup>13</sup>C and <sup>19</sup>F-NMR-spectra of 5g in CDCl<sub>3</sub>

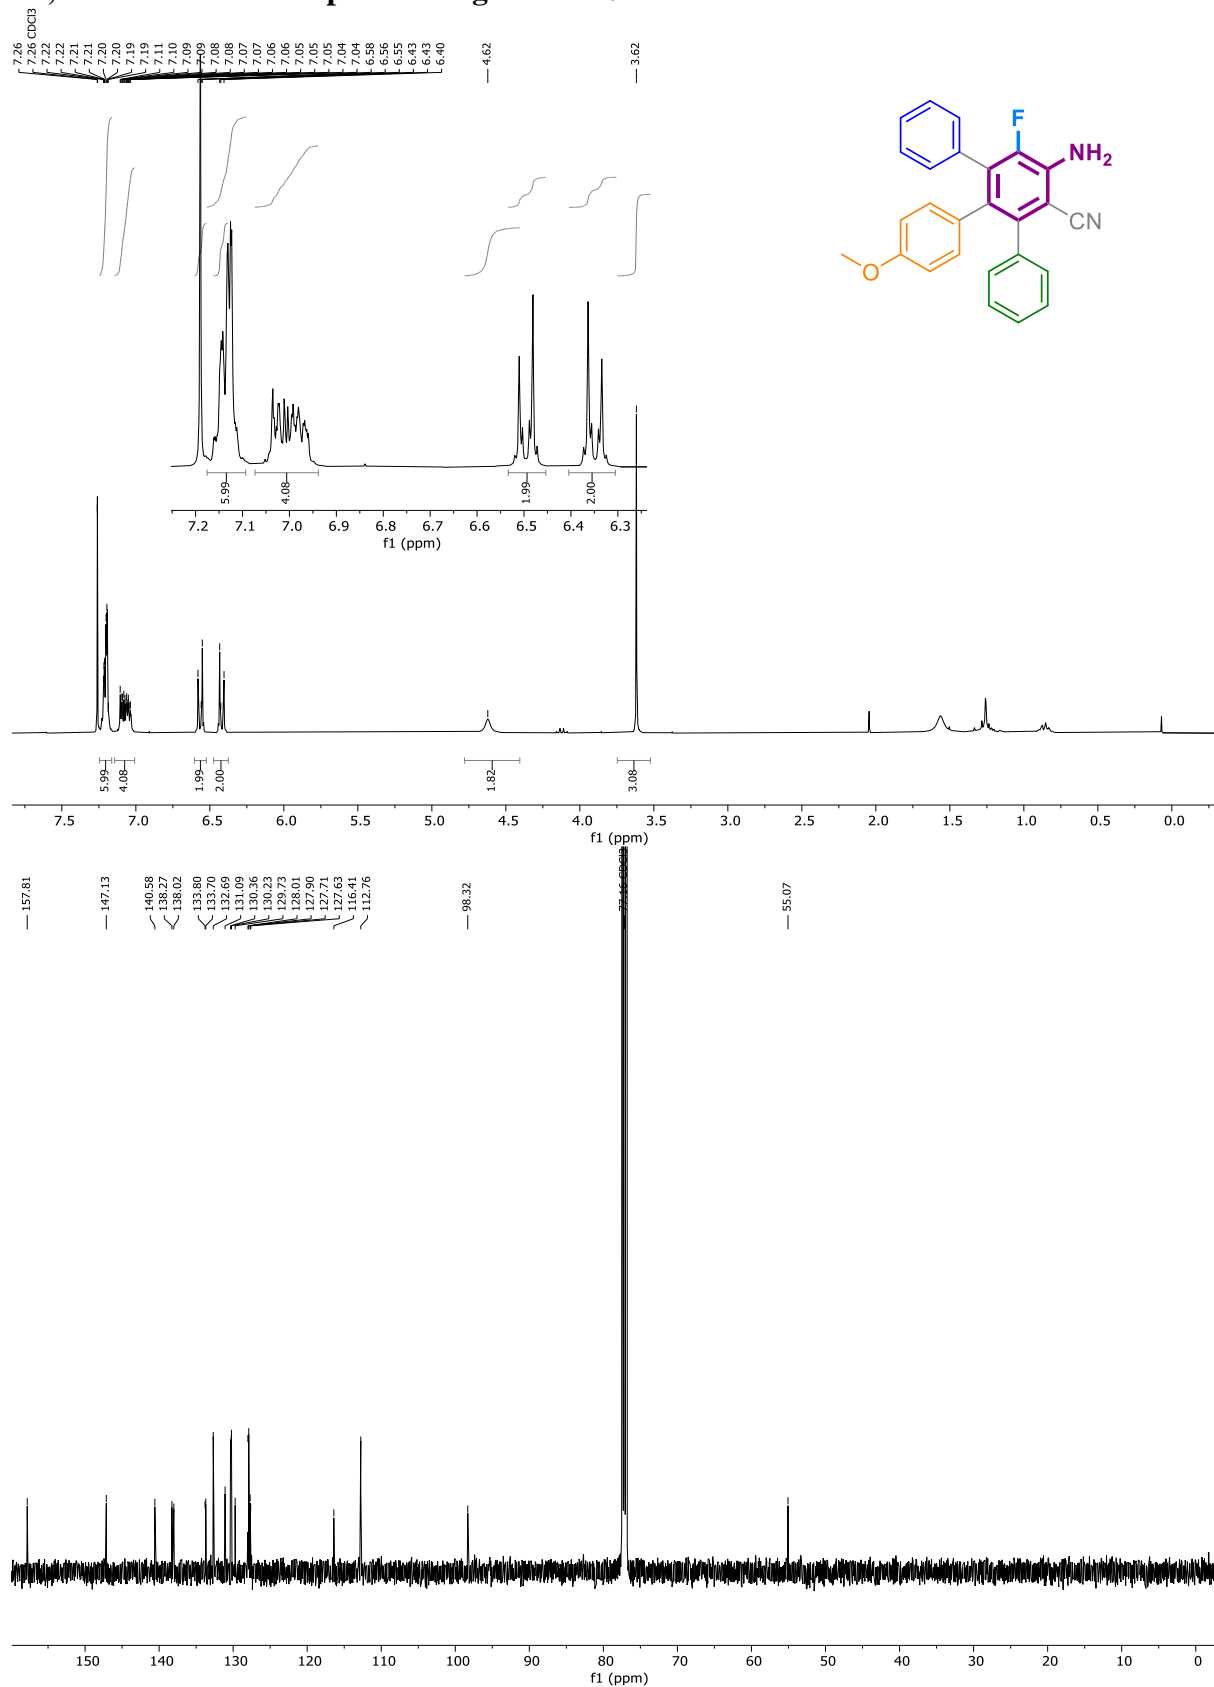

3g011522.10.1.1f - BG714

pdeta1 - #000517/GRAU/BG714/CDCl3/13C(19F, 1H)/25°C/QHP

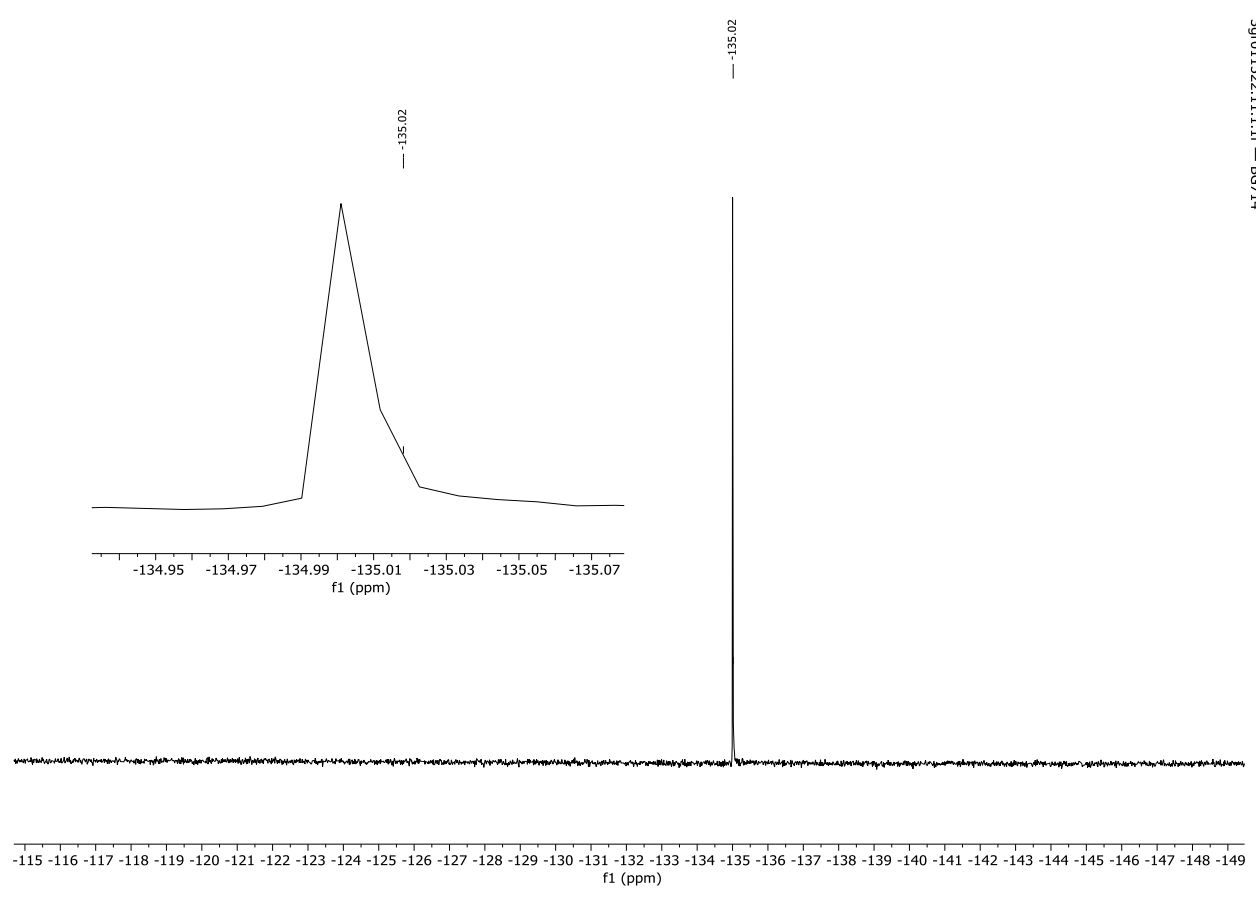

**<sup>1</sup>H, <sup>13</sup>C and <sup>19</sup>F-NMR-spectra of 5h in CDCl<sub>3</sub>**

3p011523.10.1.f1 — BG715

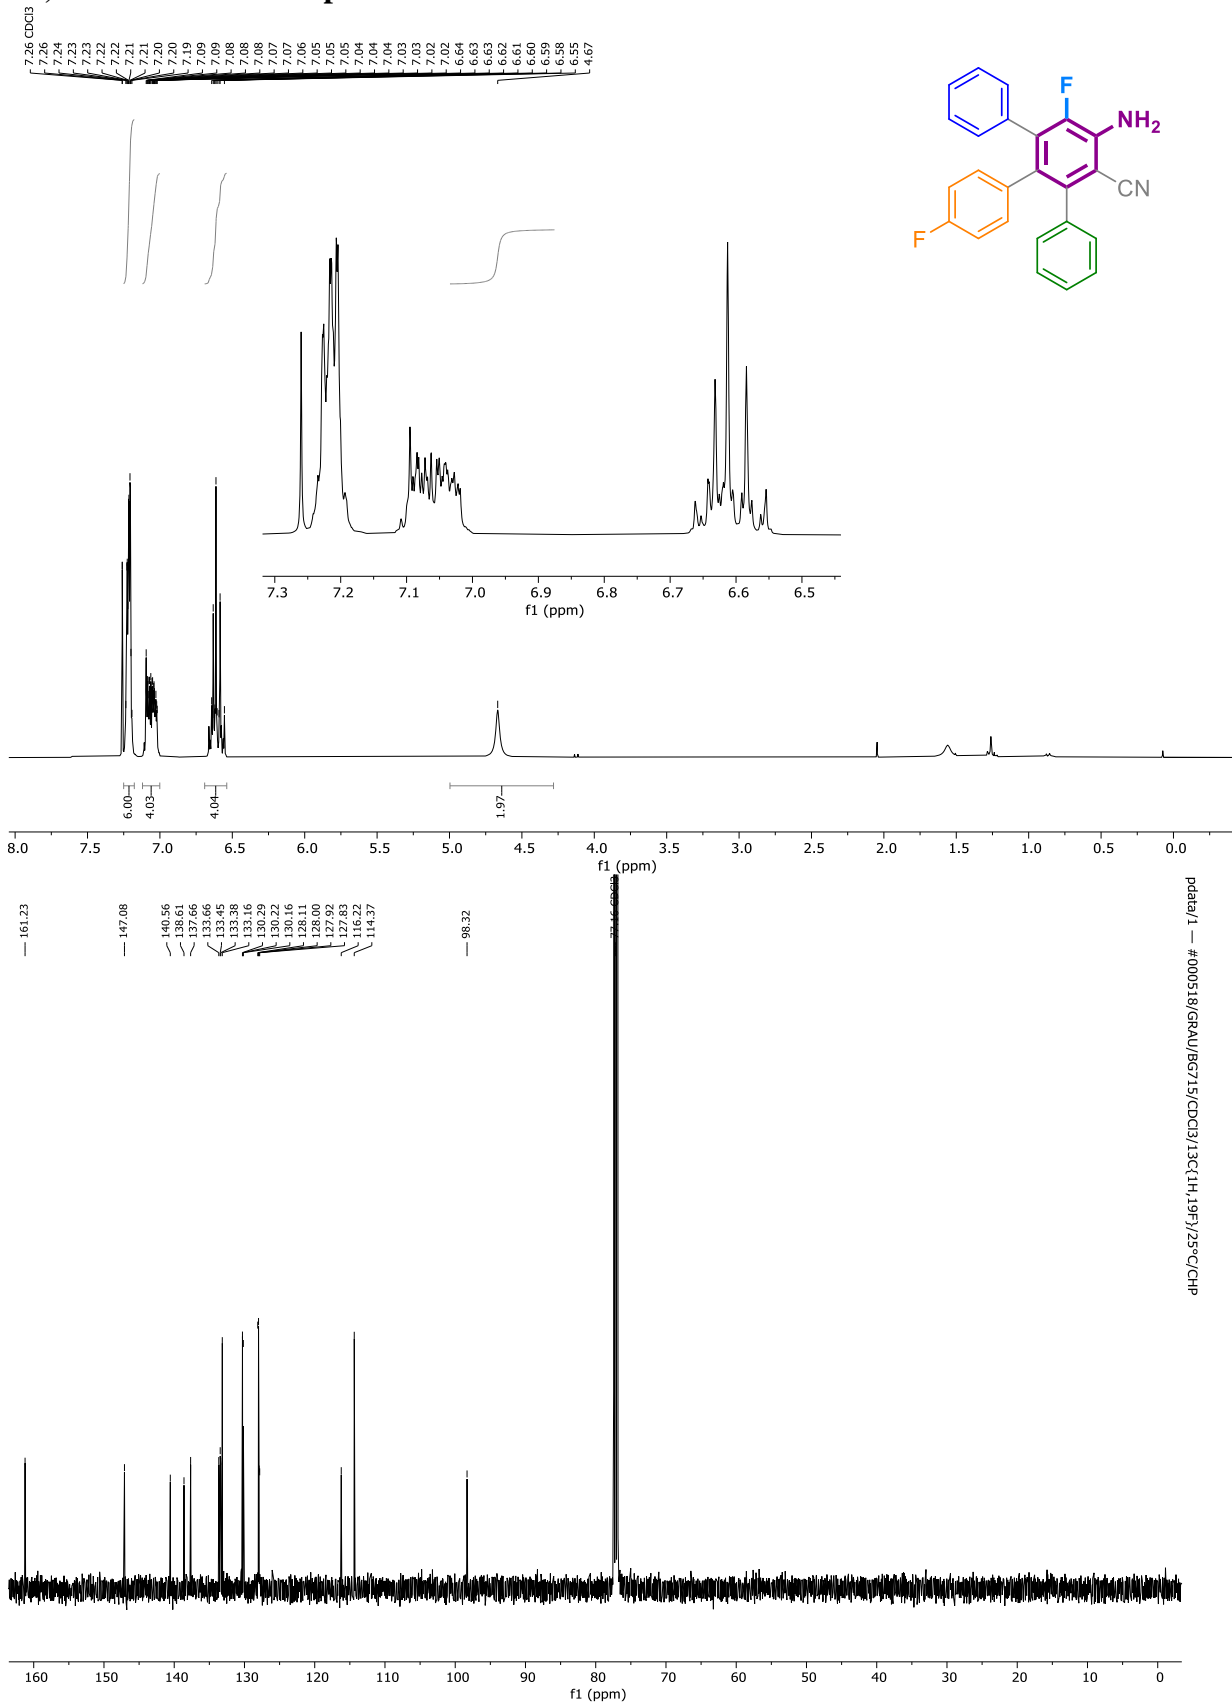

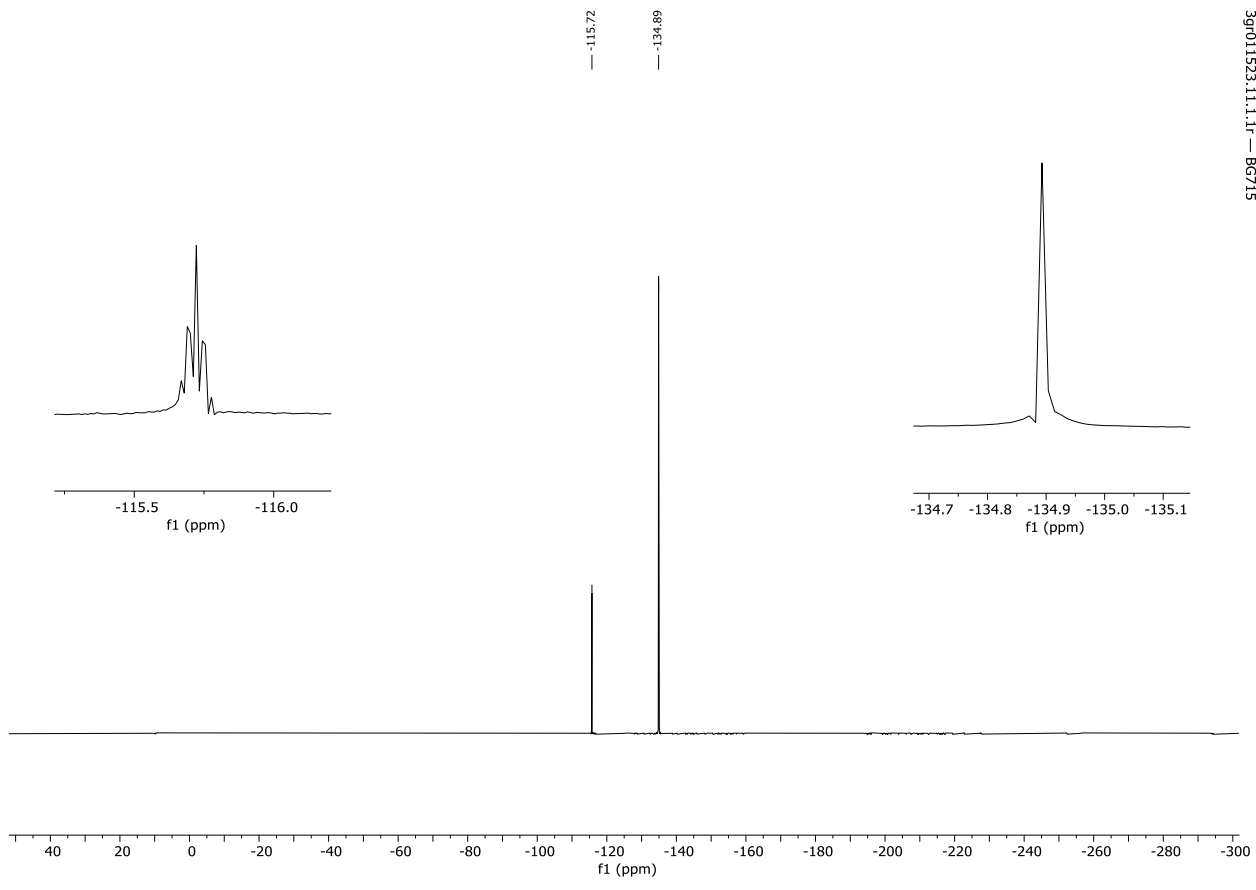

**<sup>1</sup>H, <sup>13</sup>C and <sup>19</sup>F-NMR-spectra of 5i in CDCl<sub>3</sub>**

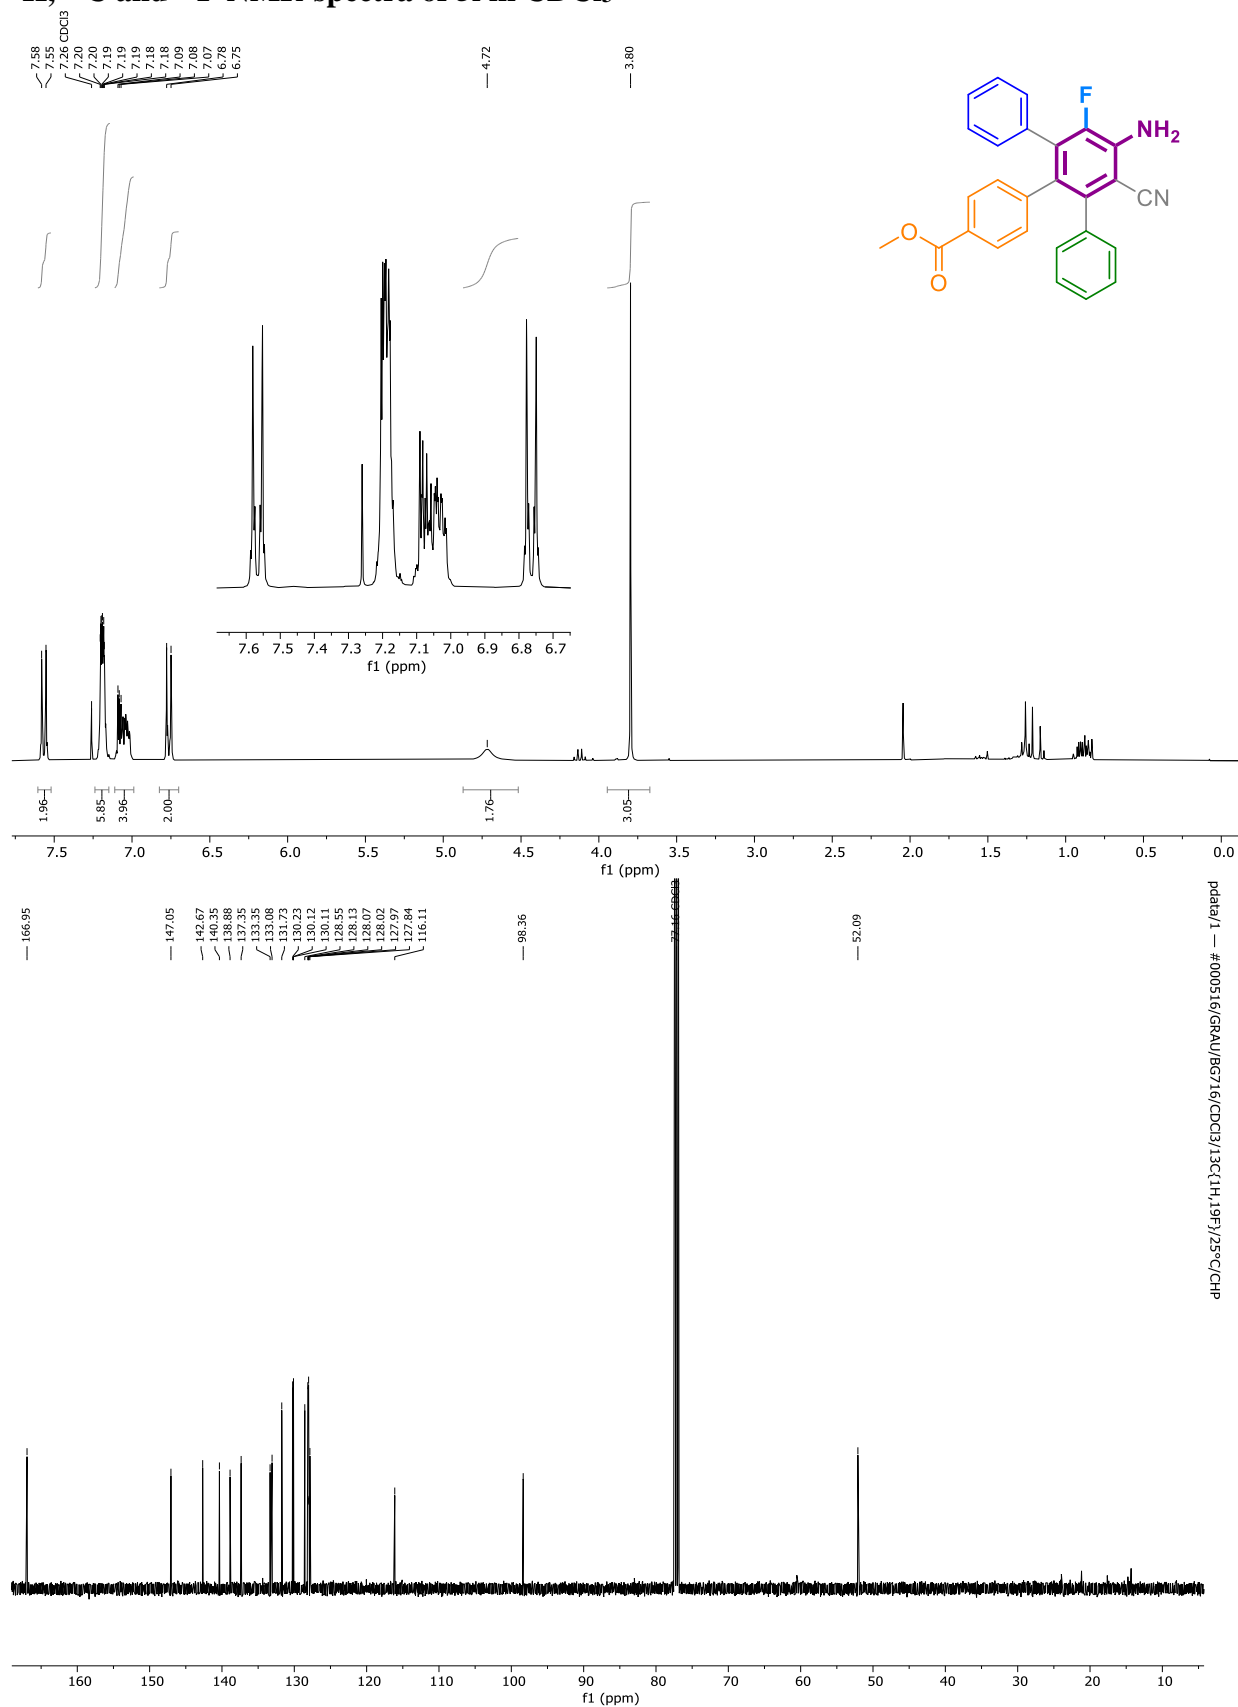

3p011683.10.1.f1 - BG716

pdata1 - #00516/GRAU/BG716/CDCl3/13C(1H,19F)/25°C/CHP

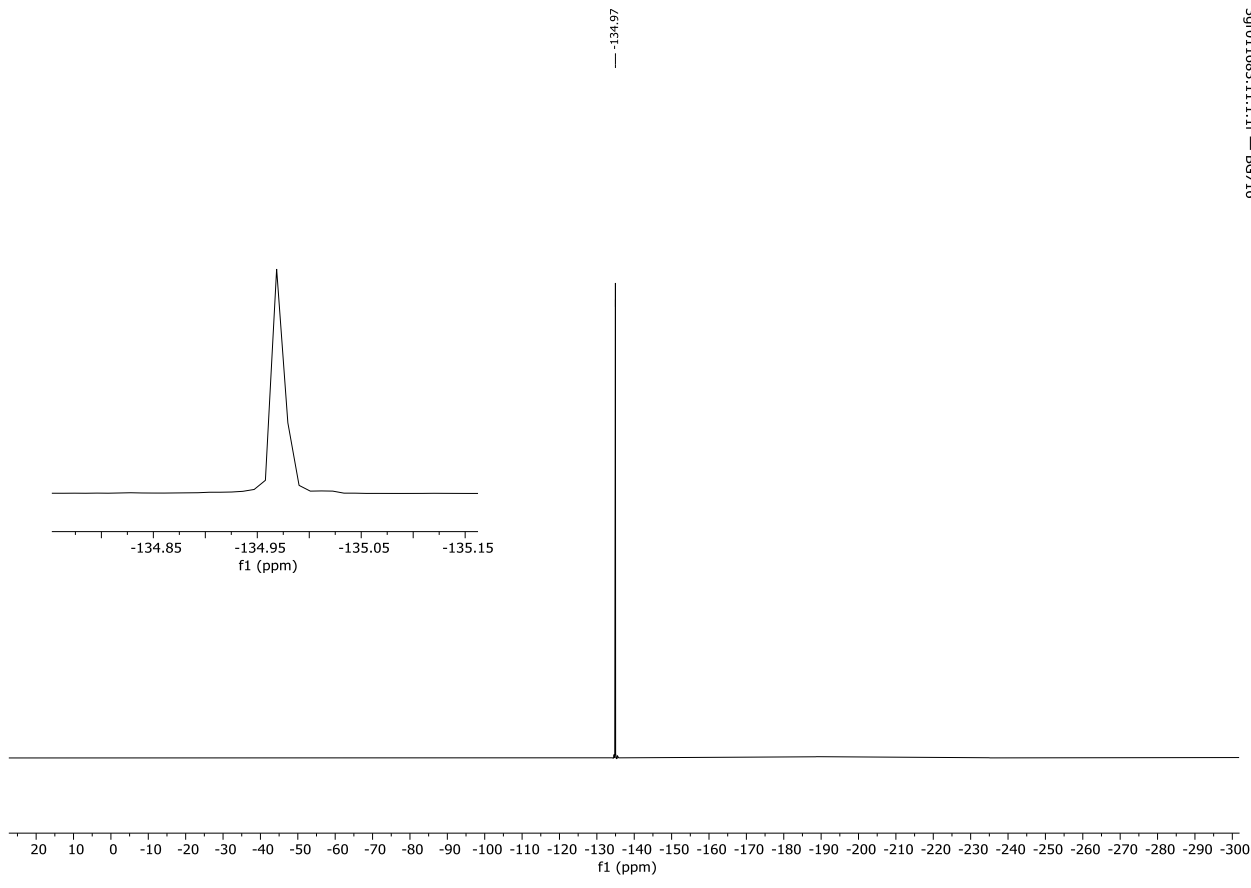

<sup>1</sup>H, <sup>13</sup>C and <sup>19</sup>F-NMR-spectra of 5j in CDCl<sub>3</sub>

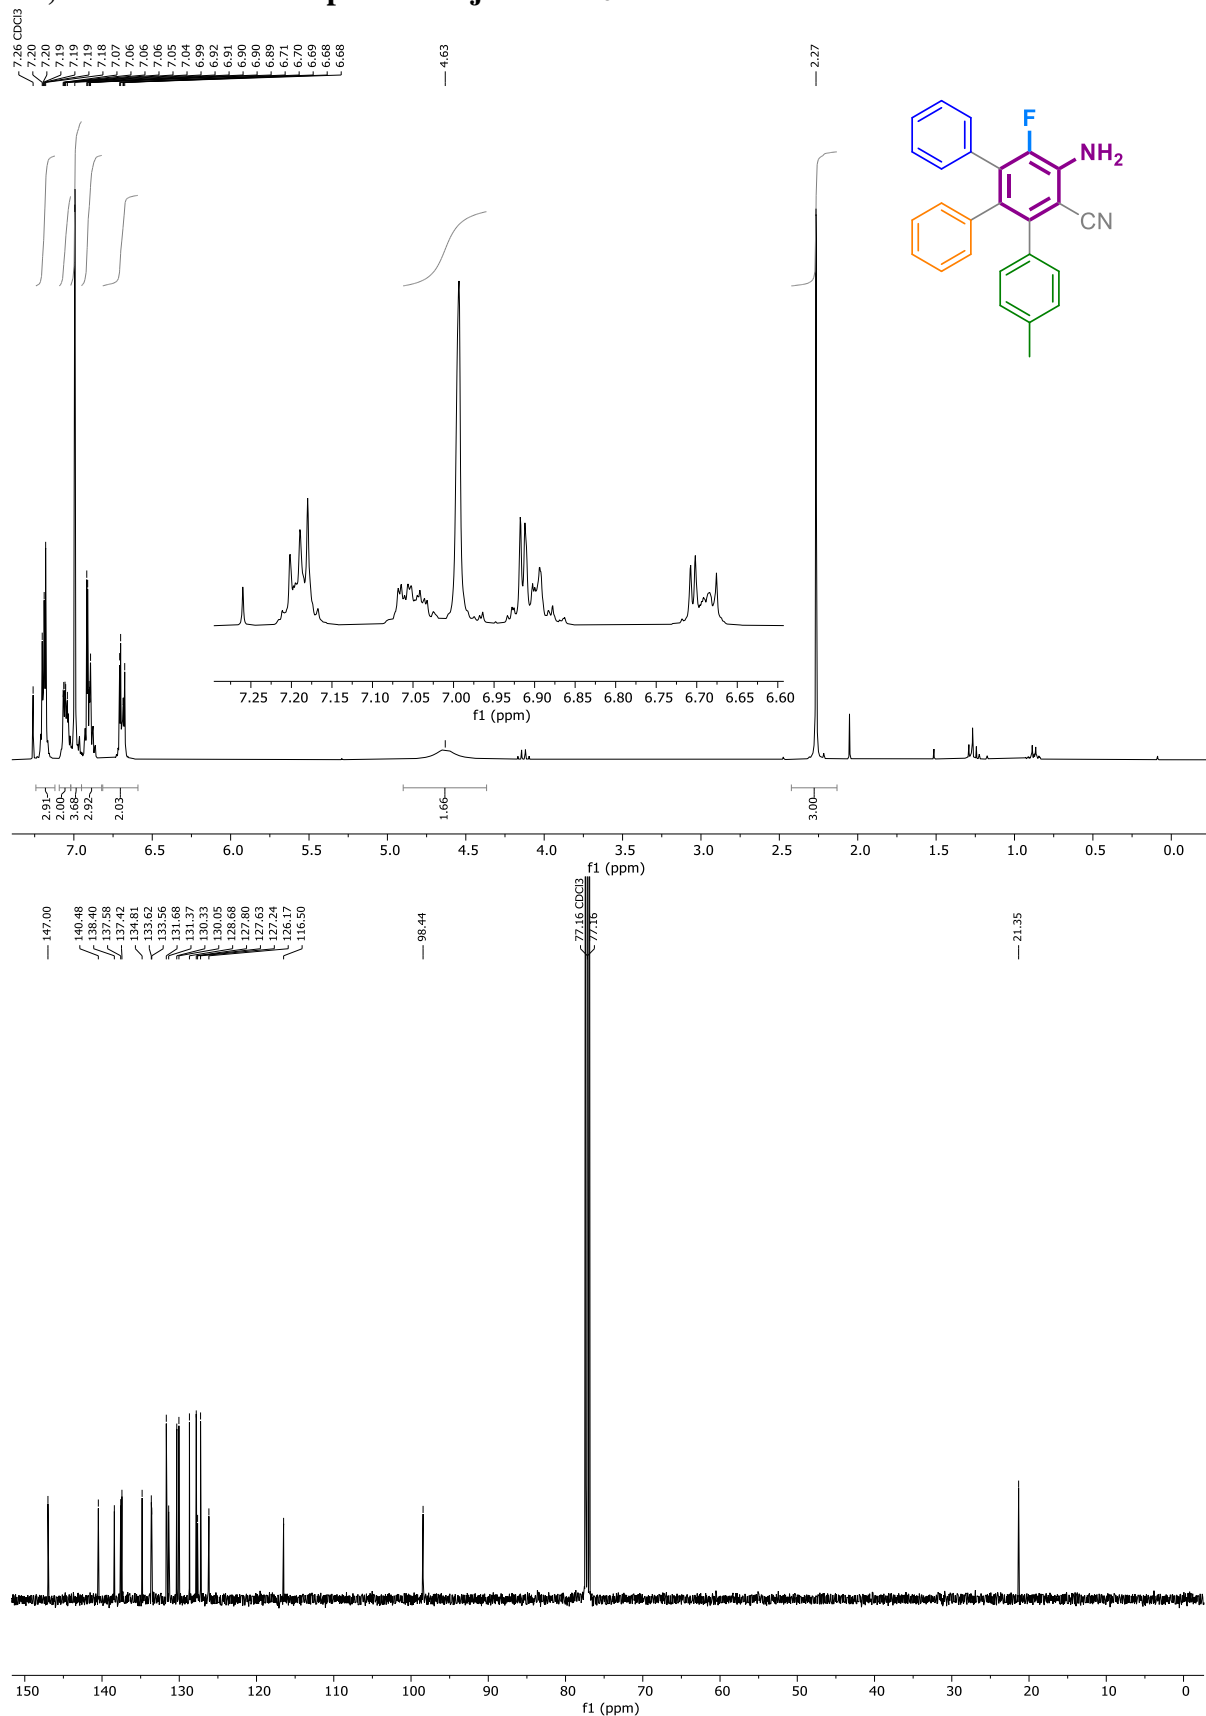

3p011676.10.1.1f - BG717

pdela1 - #000519/GRAU/BG715/CDCl3/13C(1H,19F)/25°C/GHP

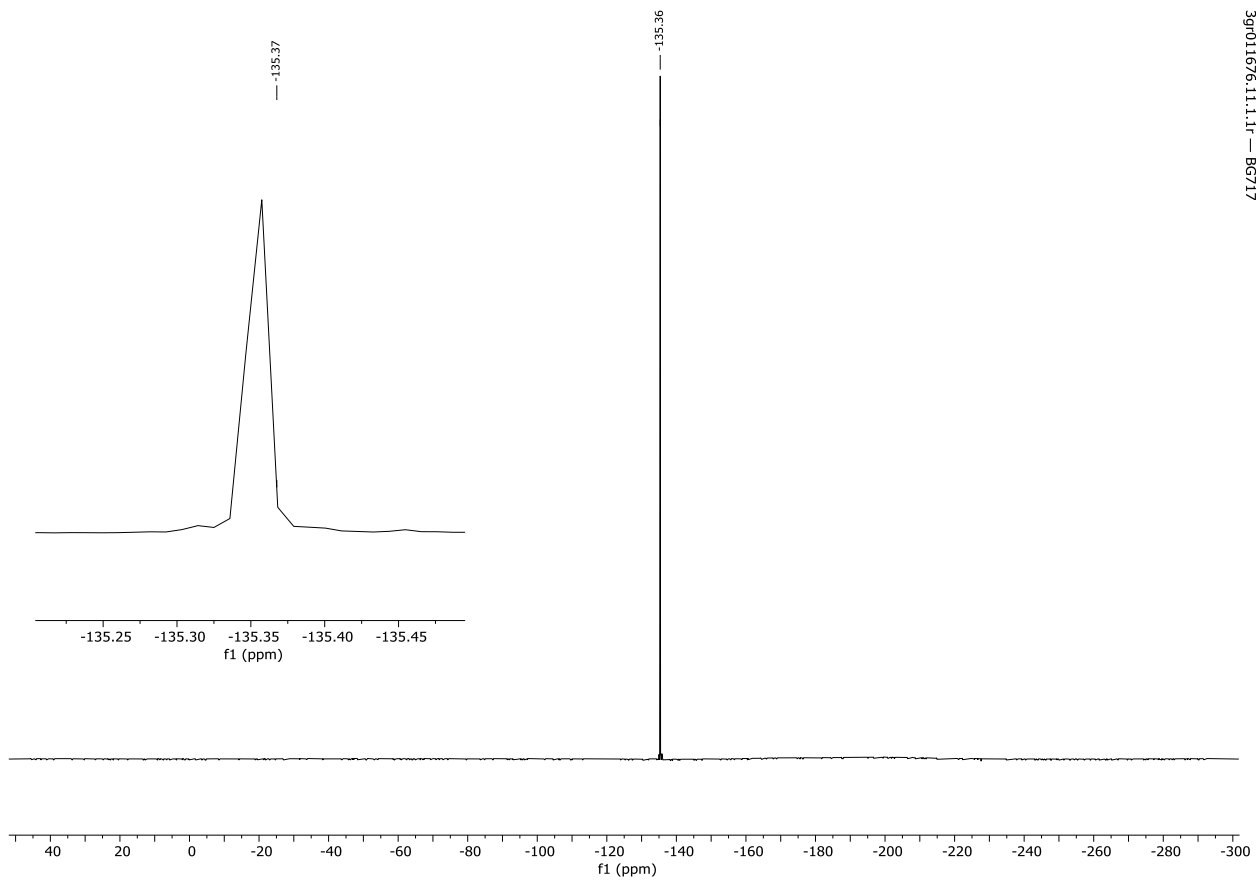



# <sup>1</sup>H, <sup>13</sup>C and <sup>19</sup>F-NMR-spectra of 5k in CDCl<sub>3</sub>

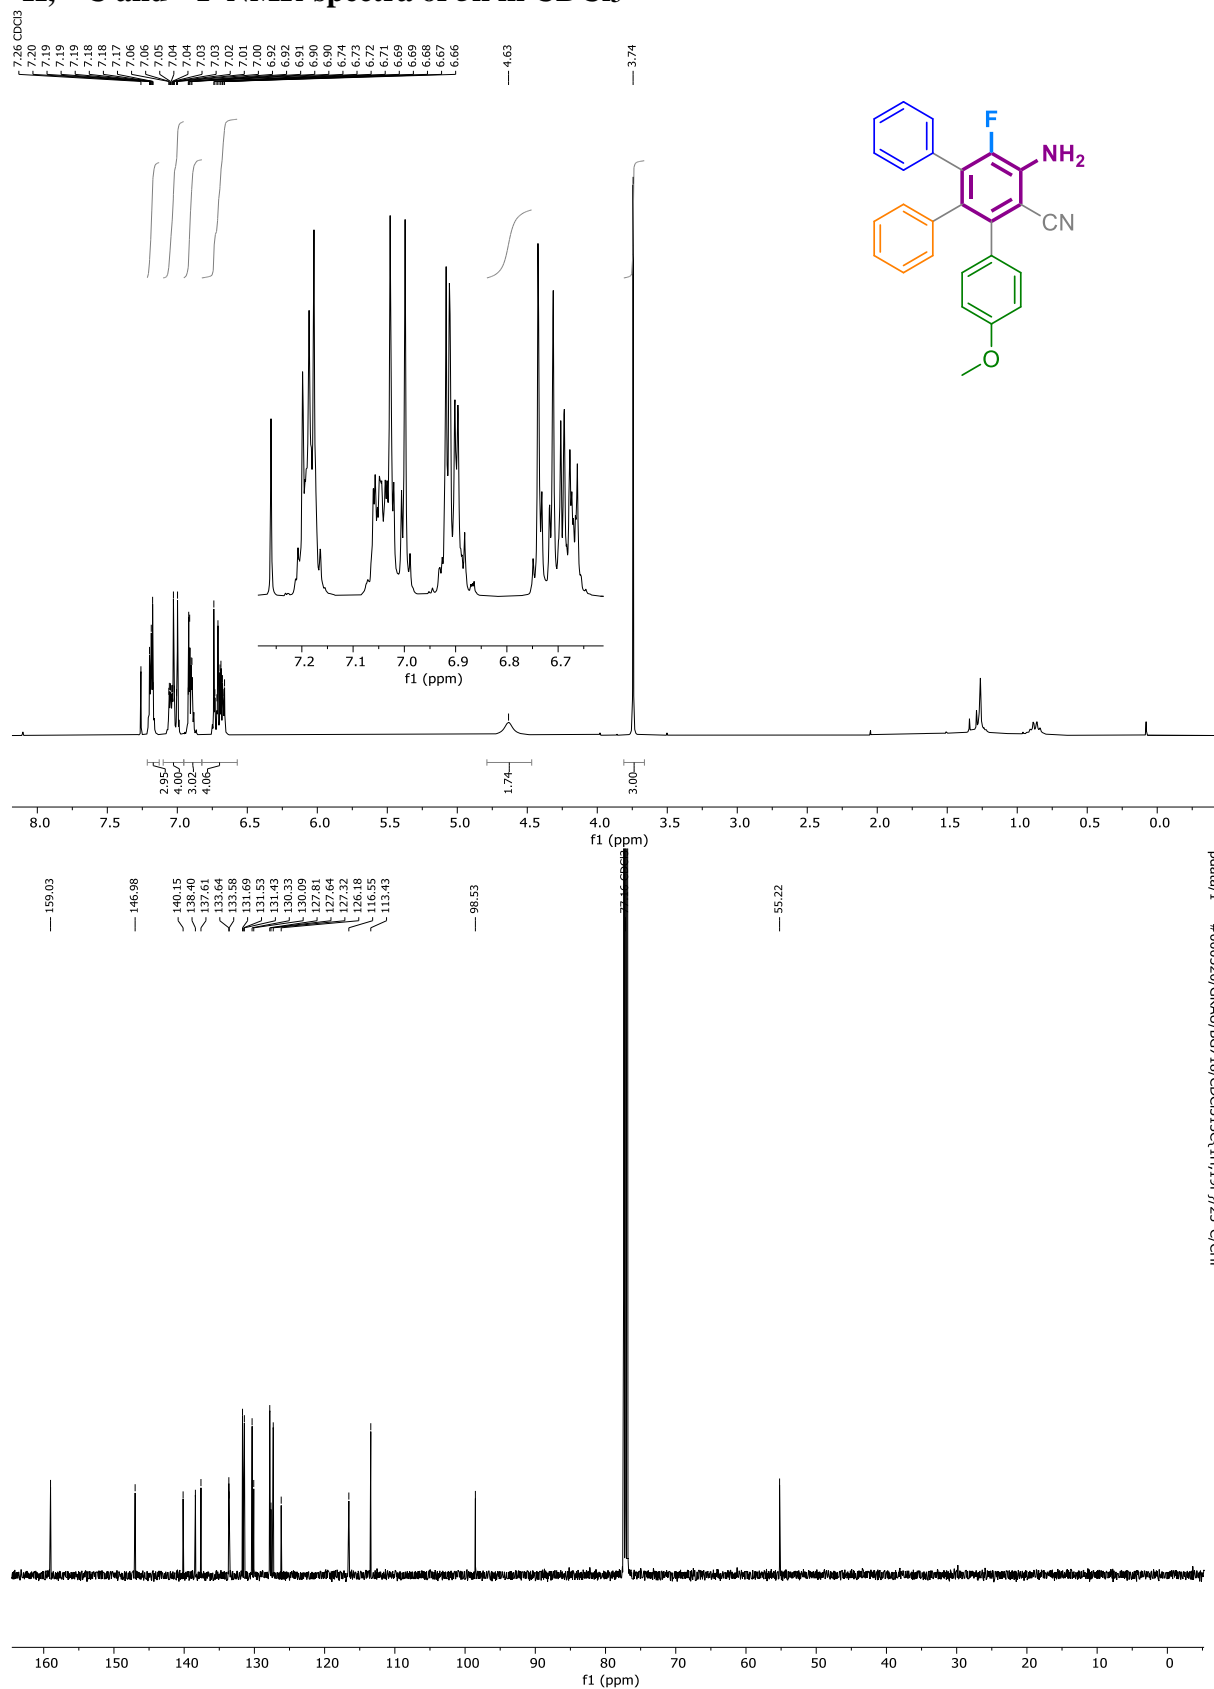

3g011677.10.1.1r - BG718

pdata1/1 - #000520/GRAN/BG718/CDCl3(1H,19F)/25°C/HP

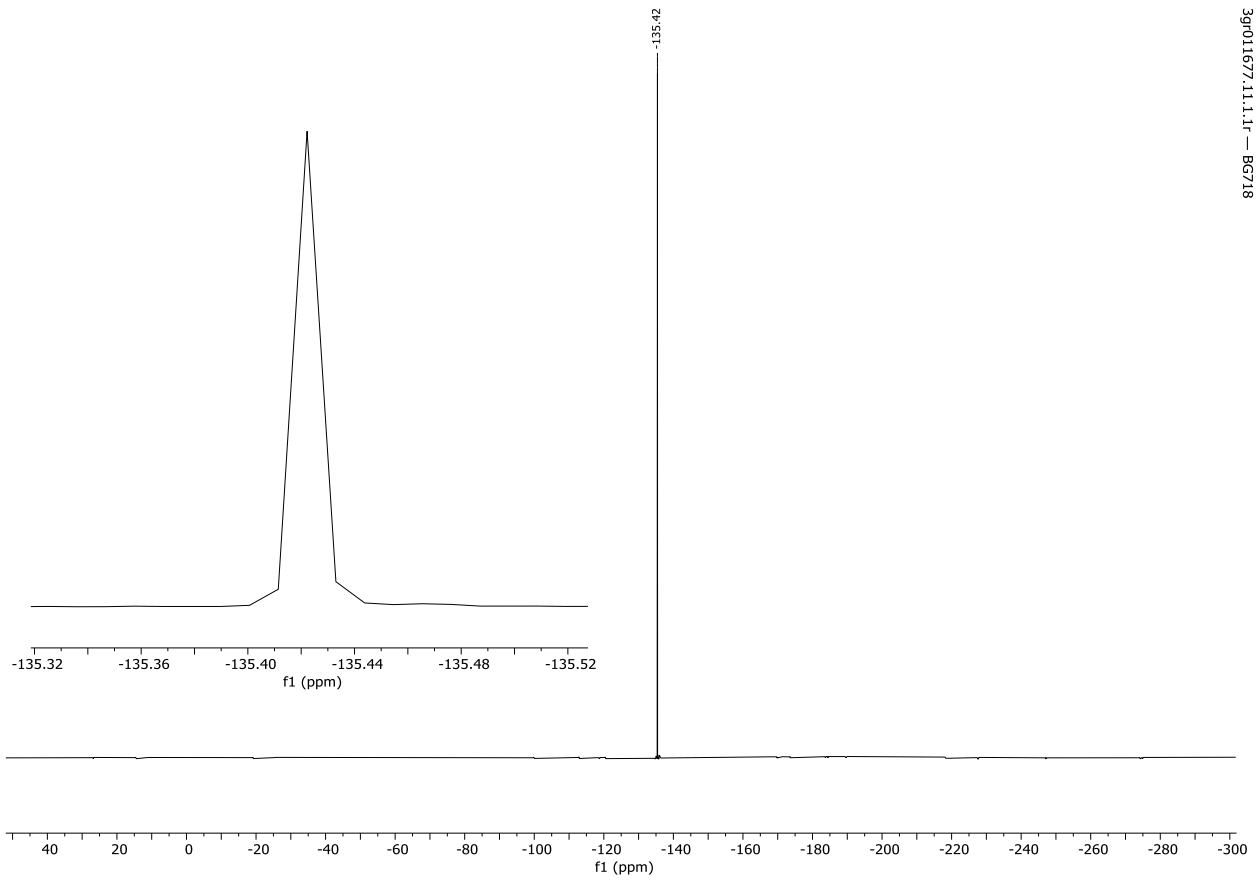

**$^1\text{H}$ ,  $^{13}\text{C}$  and  $^{19}\text{F}$ -NMR-spectra of 5l in  $\text{CDCl}_3$**

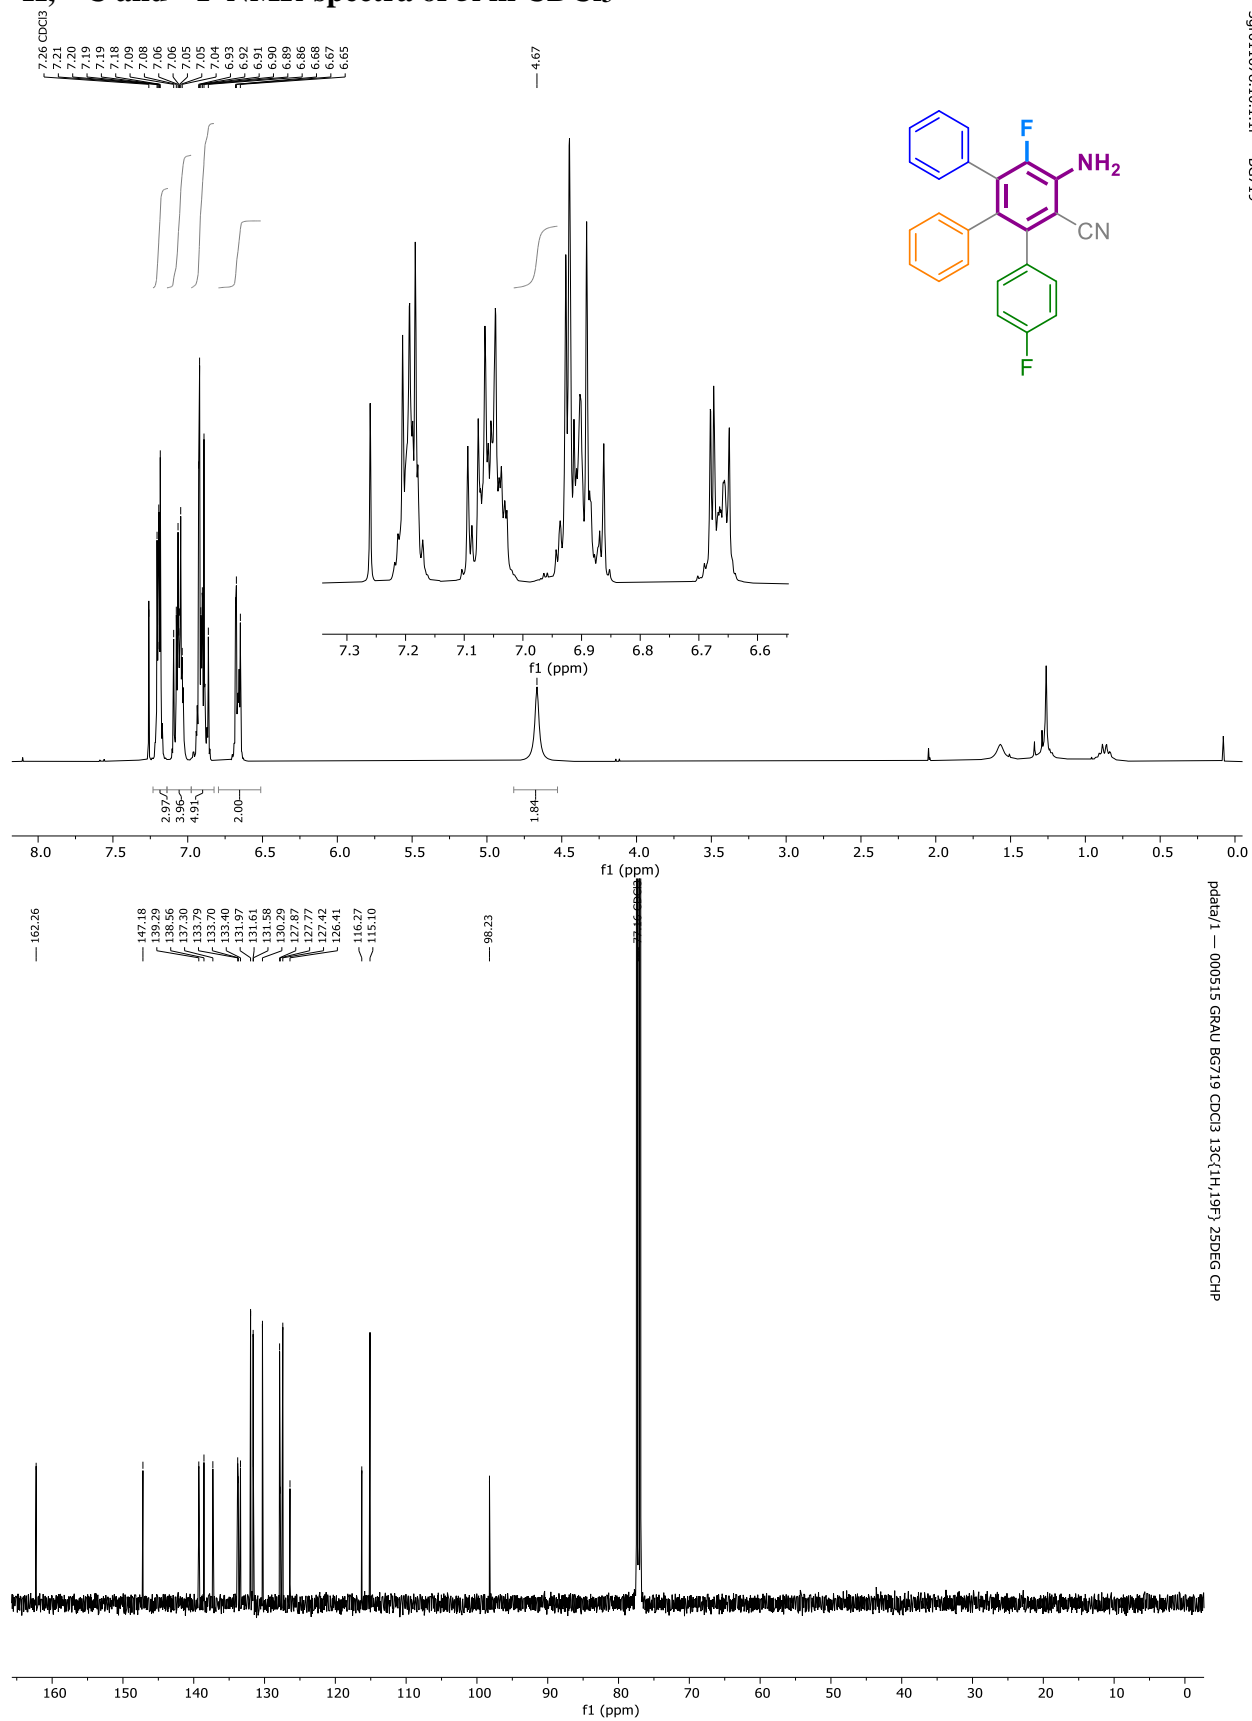

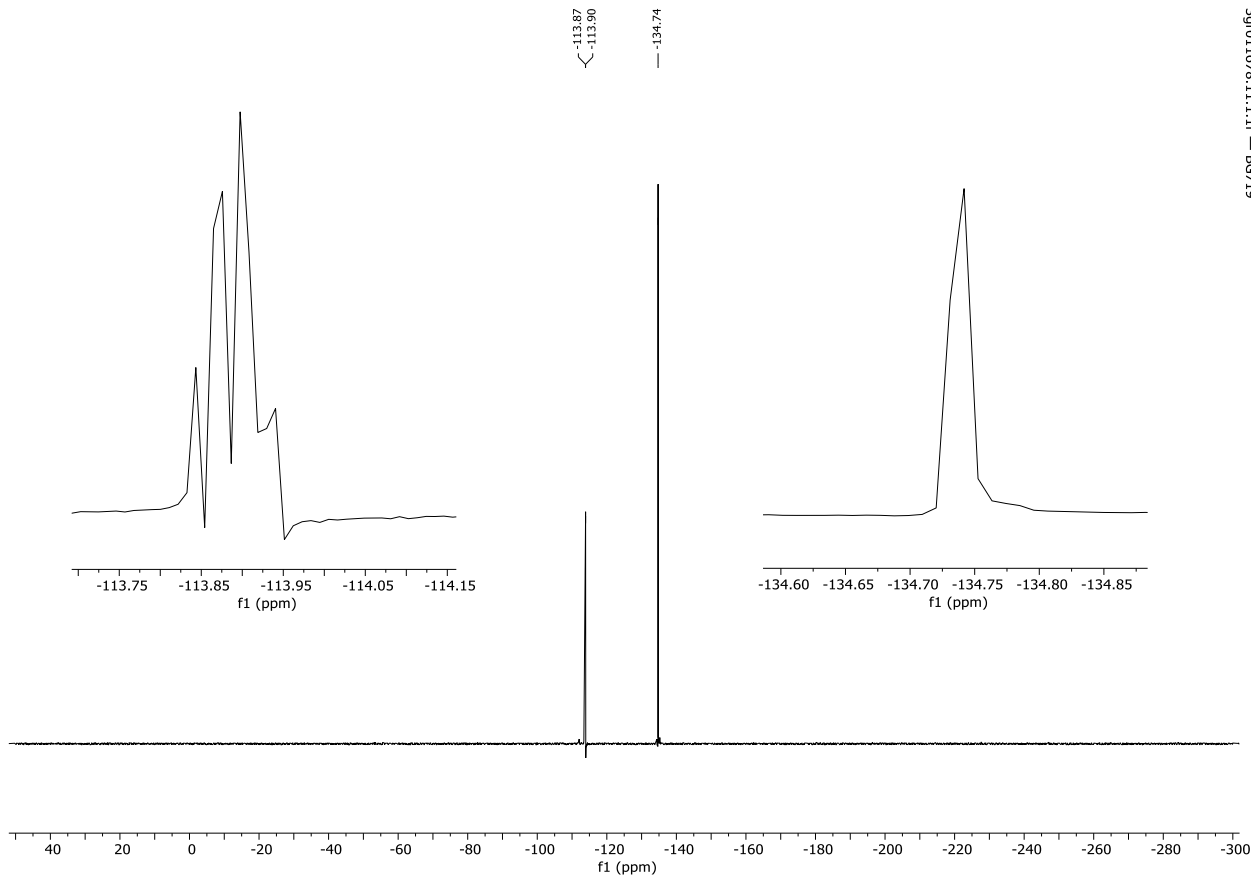

$^1\text{H}$ ,  $^{13}\text{C}$  and  $^{19}\text{F}$ -NMR-spectra of 5m in  $\text{CDCl}_3$

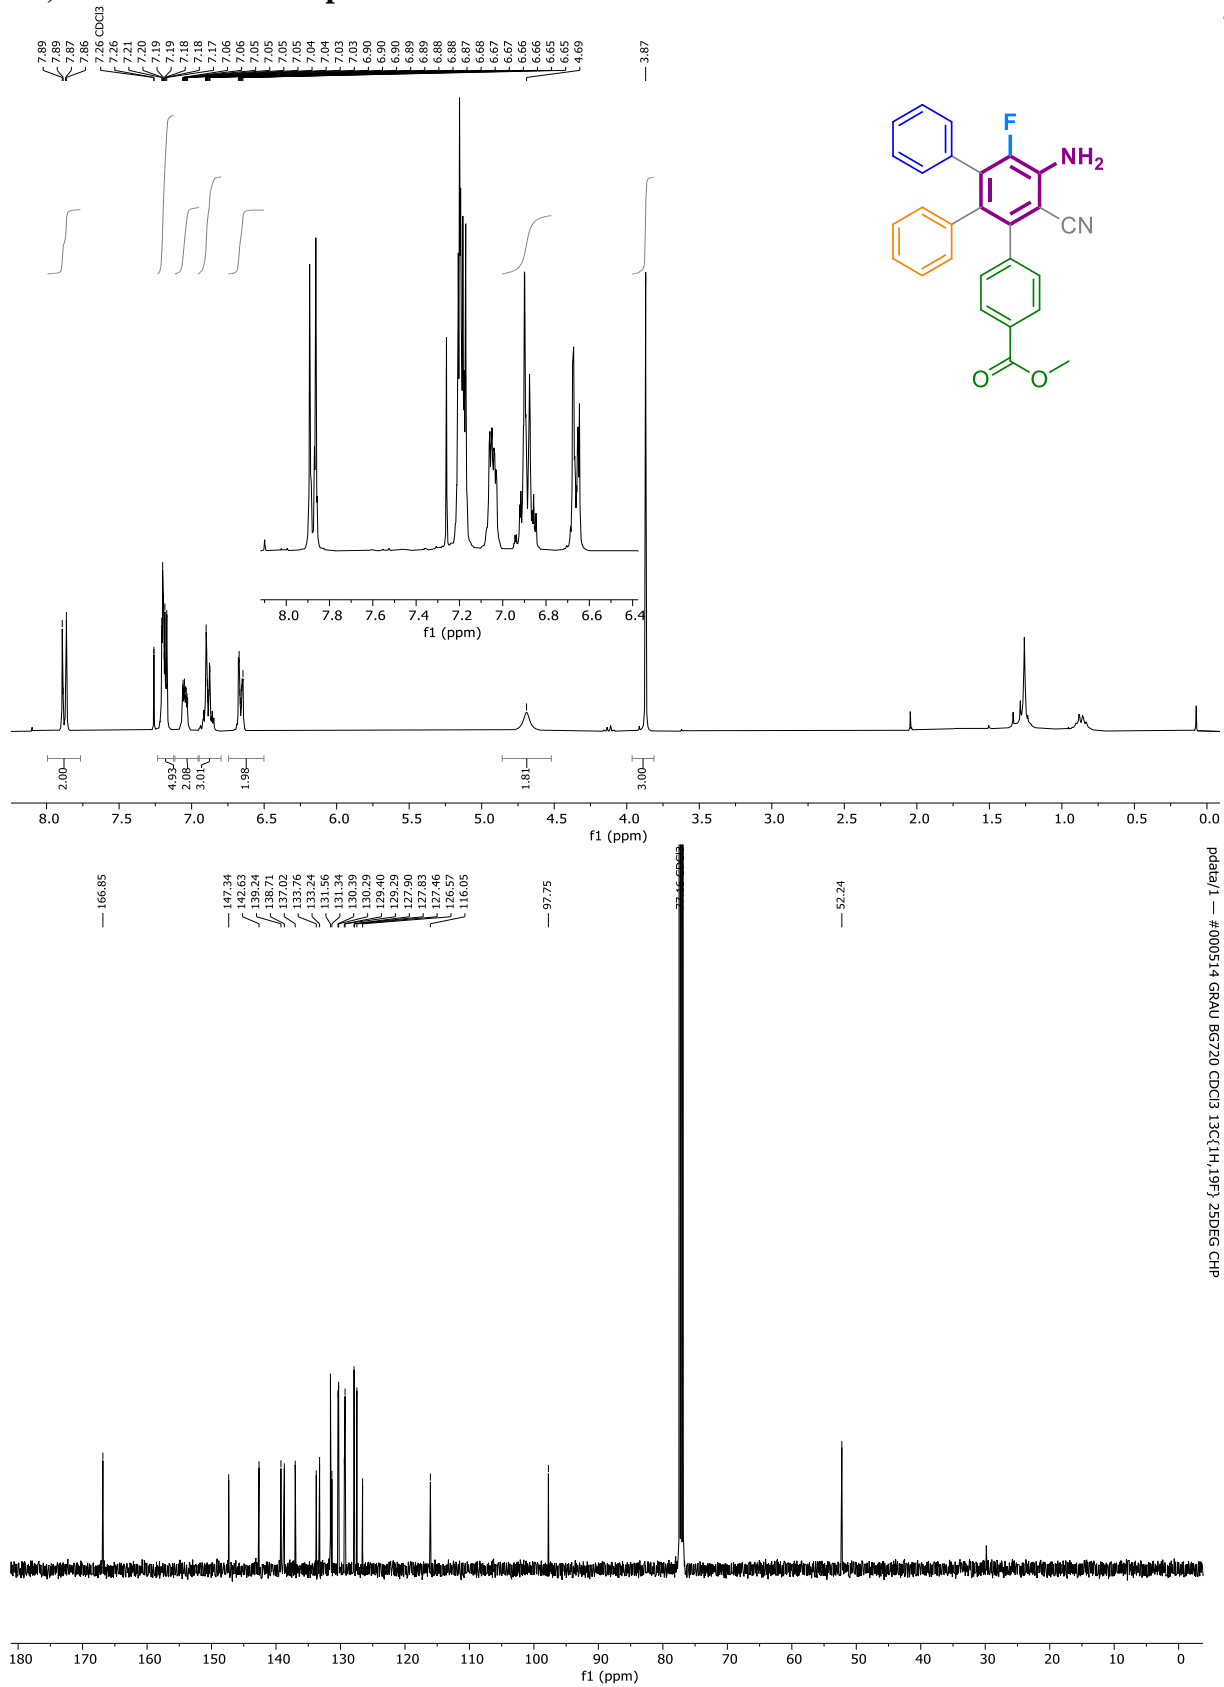

3g011679.10.1.1f - BG720

pdata/1 - #000514 GRAU BG720 CDCl3 13C(1H,19F) 25DEG CHP

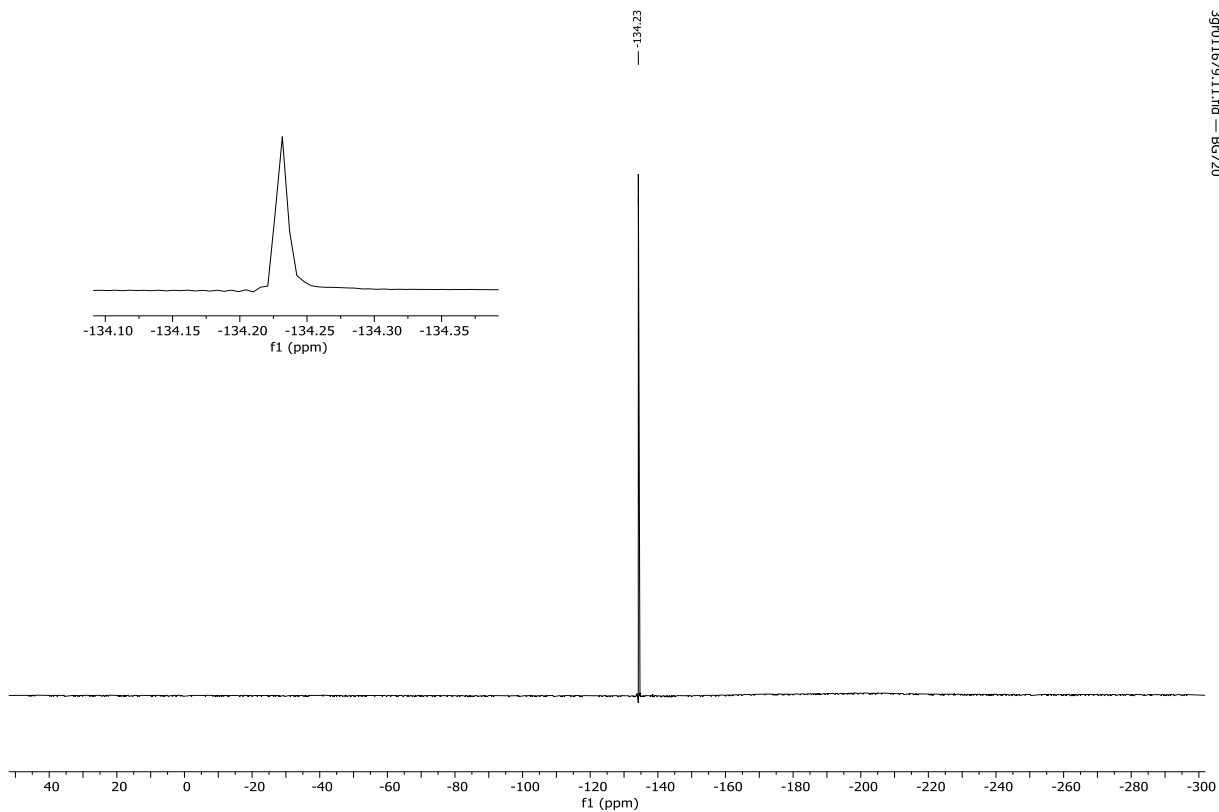

# $^1\text{H}$ , $^{13}\text{C}$ and $^{19}\text{F}$ -NMR-spectra of 5n in $\text{CDCl}_3$

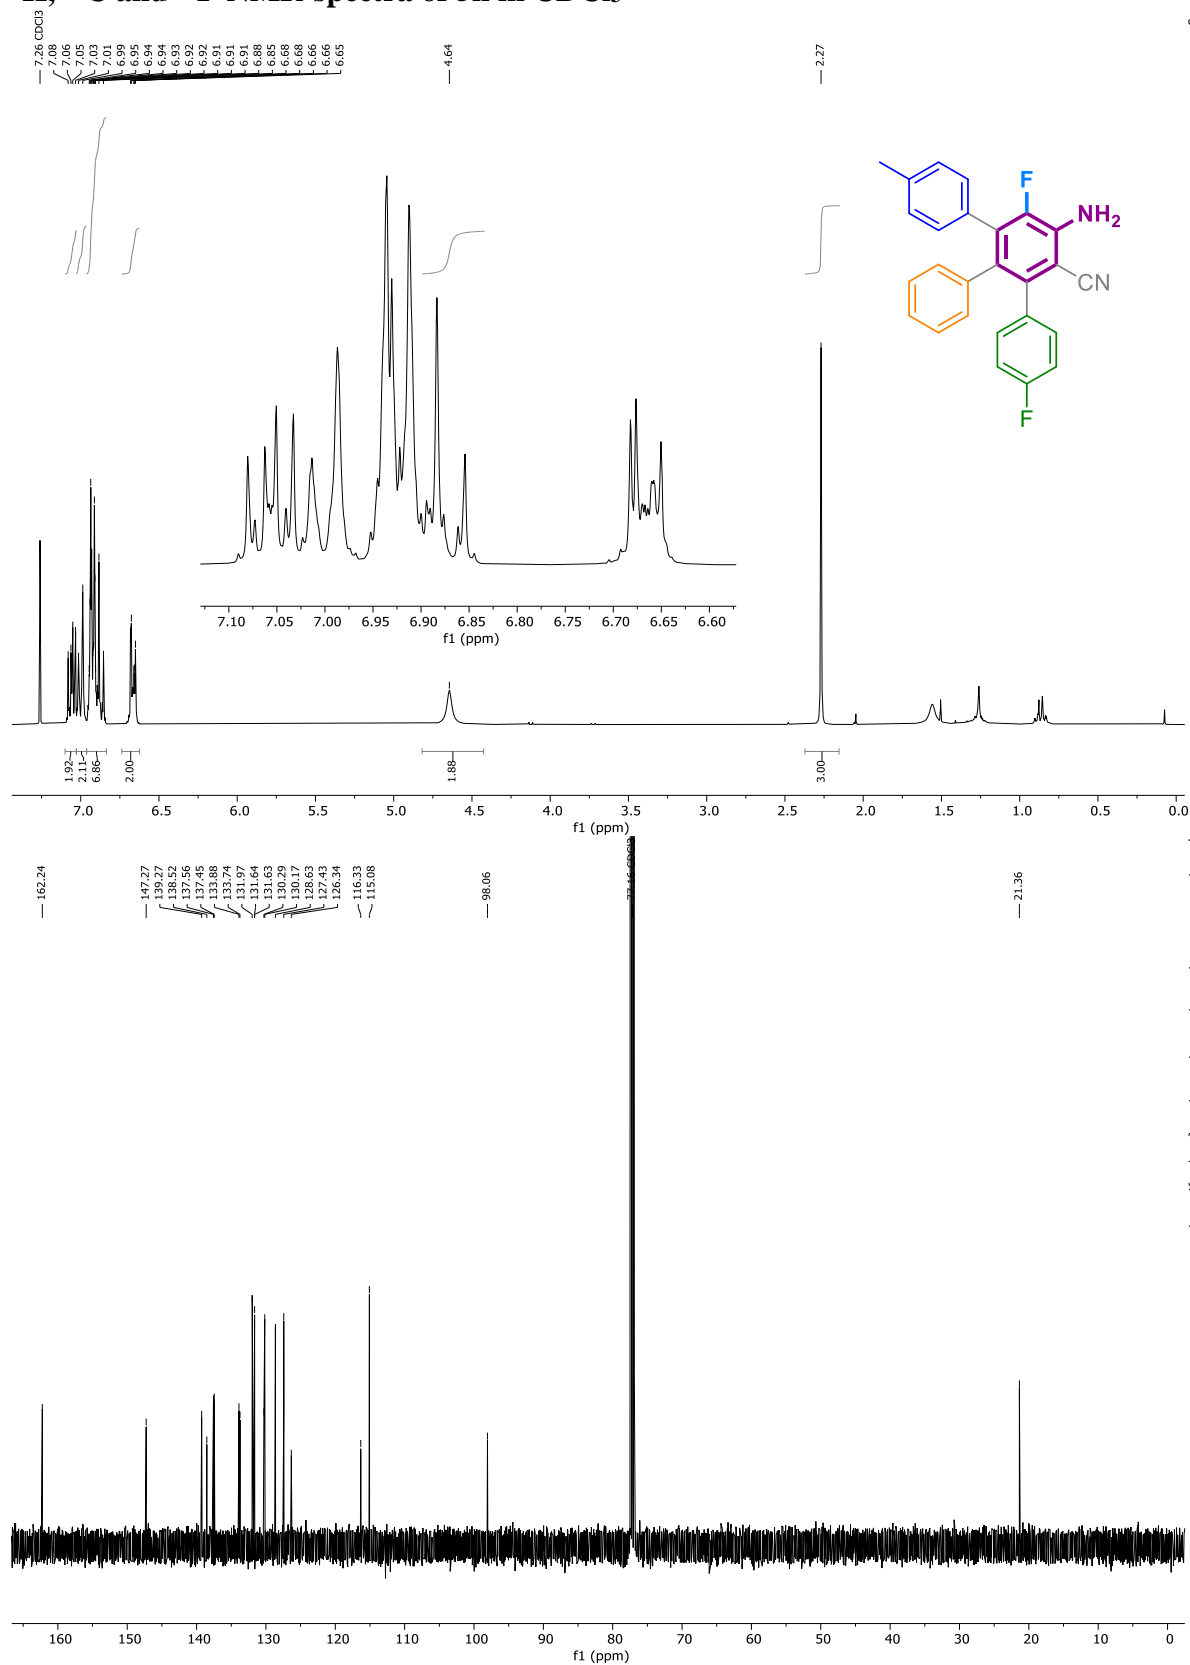

3g011125.10.11-1- BG705

pd\data/1- #000486/GRAN/BG705/CDCl3/13C(19F,1H)/25C/CHP

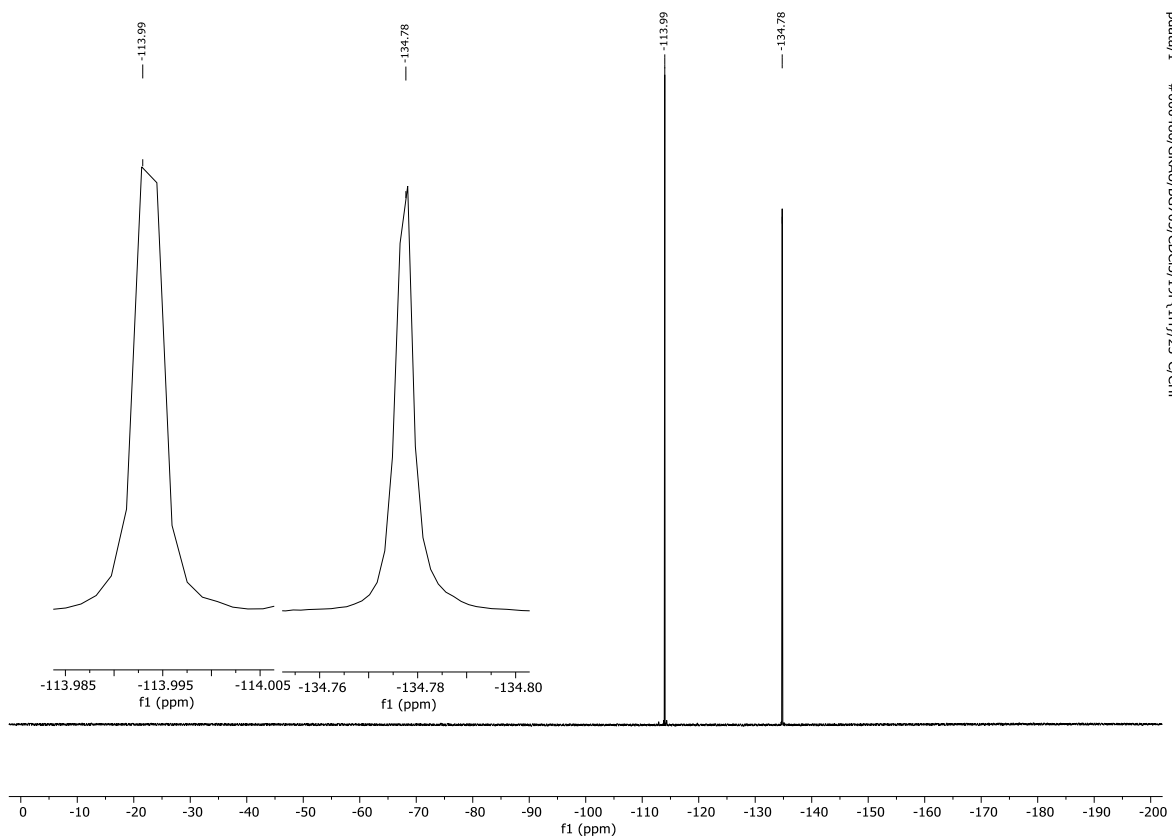

pdatet/1 — #000486/GRAM/BG705/CDCl<sub>3</sub>/19F-1H/25°C/CHP



## Synthesis of quinazolines **9** and **10**

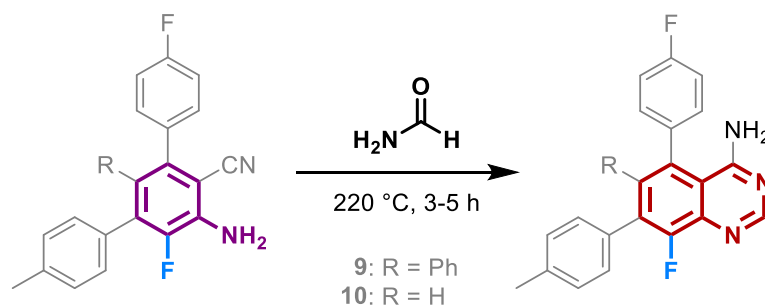

In a one neck flask equipped with reflux condenser, fluoro-derivative **3j** or **5n** (1.00 equiv.) was suspended in formamide (83.0 equiv.) and the resulting mixture was heated to 220°C for 3 – 5 h. The suspension turned clear and dark over time. After TLC indicated complete consumption of starting material, the mixture was allowed to cool down, and poured into ice water. The resulting precipitate was incorporated with DCM. After extracting the aqueous phase four additional times with DCM, the organic phases were collected, dried over  $\text{MgSO}_4$  and the solvent was evaporated under reduced pressure. The residue was purified *via* column chromatography (DCM : acetone = 5 : 1) to yield the desired quinazoline derivative as off-white crystalline solids in 77-85% yield.

**8-fluoro-5-(4-fluorophenyl)-6-phenyl-7-(*p*-tolyl)quinazolin-4-amine **9****

Off-white, crystalline solid, 181 mg, 427  $\mu\text{mol}$ , 85% yield.

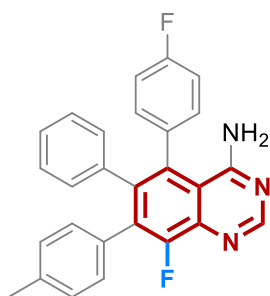

$\text{C}_{27}\text{H}_{19}\text{F}_2\text{N}_3$   
MW: 423.47

$^1\text{H}$  NMR (500 MHz, Methylene Chloride- $d_2$ )  $\delta$  = 8.58 (d,  $J$  = 0.4 Hz, 1H), 7.20 – 7.13 (m, 2H), 7.03 (d,  $J$  = 0.8 Hz, 4H), 6.99 – 6.91 (m, 5H), 6.82 – 6.72 (m, 2H), 2.27 (s, 3H).

$^{13}\text{C}$  NMR (126 MHz, Methylene Chloride- $d_2$ )  $\delta$  = 162.77, 161.68, 155.99, 154.35, 141.59, 141.01, 138.55, 137.92, 135.47, 132.93, 132.39, 132.03, 131.60, 131.33, 130.69, 128.95, 127.53, 126.73, 116.00, 113.65, 21.46.

$^{19}\text{F}$  NMR (471 MHz, Methylene Chloride- $d_2$ )  $\delta$  = -113.53, -125.93.

HR-MS (APPI positive mode):  $m/z$  = calc. for ( $[\text{M}]^+$ ): 424.1620, found: 424.1629.

**8-fluoro-5-(4-fluorophenyl)-7-(*p*-tolyl)quinazolin-4-amine **10****

Off-white, crystalline solid, 57.2 mg, 165  $\mu\text{mol}$ , 77% yield.

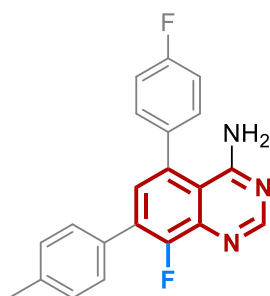

$\text{C}_{21}\text{H}_{15}\text{F}_2\text{N}_3$   
MW: 347.37

$^1\text{H}$  NMR (500 MHz, Methylene Chloride- $d_2$ )  $\delta$  = 8.58 (s, 1H), 7.61 – 7.55 (m, 3H), 7.50 – 7.43 (m, 2H), 7.34 – 7.30 (m, 2H), 7.29 – 7.19 (m, 2H), 2.42 (d,  $J$  = 0.7 Hz, 3H).

$^{13}\text{C}$  NMR (126 MHz, Methylene Chloride- $d_2$ )  $\delta$  = 163.53, 161.40, 156.13, 154.03, 142.78, 139.40, 136.68, 133.95, 132.09, 131.79, 130.11, 129.97, 129.94, 129.61, 116.51, 112.80, 21.55.

$^{19}\text{F}$  NMR (471 MHz, Methylene Chloride- $d_2$ )  $\delta$  = -113.28, -130.99.

HR-MS (APPI):  $m/z$  = calc. for ( $[\text{M}]^+$ ): 348.1307, found: 348.1307.

## Synthesis of compounds 11-18

### 3'-(aminomethyl)-4'',5'-difluoro-6'-(p-tolyl)-[1,1':2',1''-terphenyl]-4'-amine **11**

Off-white solid, 241 mg, 602  $\mu\text{mol}$ , 95% yield.

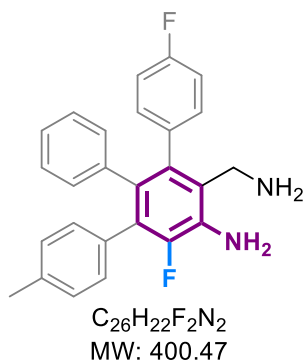

In a two-neck flask equipped with a septum and a reflux condenser, fluorine derivate **5n** (250 mg, 631  $\mu\text{mol}$ , 1.00 equiv.) was dissolved in 4 ml dry THF, and dimethylsulfate-borane-diethyl ether complex (192 mg, 239  $\mu\text{l}$ , 2.52 mmol, 4.00 equiv.) was added carefully. The resulting mixture was heated to 70  $^{\circ}\text{C}$  for 3 h. After cooling to 0  $^{\circ}\text{C}$  with an ice bath, a mixture of water (6.5 ml) and HCl (6 M, 1.5 ml) was added carefully (strong bubbling observed!) under  $\text{N}_2$ -atmosphere. As soon as the bubbling abated, the reaction mixture was heated to 95  $^{\circ}\text{C}$  for 1 h, and after cooling to room temperature, poured onto NaOH solution (1 M, 55 ml). A voluminous precipitate formed,

additionally the pH was checked to confirm a basic solution. The suspension was extracted 3x with DCM (400 ml, the product is very insoluble), the organic phases were combined, dried over  $\text{MgSO}_4$  and the solvent was evaporated under reduced pressure to obtain the desired product as an off-white powder in satisfying purity (241 mg, 602  $\mu\text{mol}$ , 95% yield).

*Very bad solubility! Decent solubility in DCM/MeOH mixture or DMSO*

$^1\text{H}$  NMR (600 MHz, Acetonitrile- $d_3$ )  $\delta$  = 7.08 – 6.94 (m, 6H), 6.91 – 6.83 (m, 5H), 6.82 – 6.74 (m, 2H), 5.00 (s, 2H), 3.54 (s, 2H), 2.23 (s, 3H) ppm.

$^{13}\text{C}$  NMR (151 MHz, Acetonitrile- $d_3$ )  $\delta$  = 162.18 (d,  $J$  = 243.2 Hz), 149.77, 148.22, 140.78 (d,  $J$  = 2.4 Hz), 137.49 (d,  $J$  = 3.2 Hz), 137.39, 137.06 (d,  $J$  = 3.3 Hz), 135.51 (d,  $J$  = 14.5 Hz), 133.22 (d,  $J$  = 8.0 Hz), 132.78, 131.51 (d=1.0 Hz), 131.44, 129.09, 128.13 (d,  $J$  = 13.8 Hz), 127.61, 127.05 (d,  $J$  = 3.9 Hz), 126.37, 114.81 (d,  $J$  = 21.4 Hz), 41.88 (d,  $J$  = 2.8 Hz), 21.08 ppm.

$^{19}\text{F}$  NMR (471 MHz, Acetonitrile- $d_3$ )  $\delta$  = -118.37, -139.74 ppm.

HR-MS (ESI positive mode):  $m/z$  = calc. for ( $[\text{M}+\text{H}]^+$ ): 401.182382, found: 401.182219.

(E)-4'-((4-(dimethylamino)phenyl)diazenyl)-4'',5'-difluoro-6'-(p-tolyl)-[1,1':2',1''-terphenyl]-3'-carbonitrile **12**

Red solid, 12.9 mg, 24.4  $\mu\text{mol}$  27% yield.

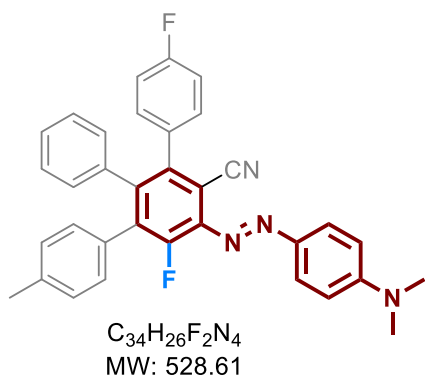

To a solution of **5n** (36.4 mg, 92  $\mu\text{mol}$ ) in 3.5 ml MeCN *tert*-butyl nitrite (17.8  $\mu\text{l}$ , 0.15 mmol) and *N,N*-dimethylaniline (15.1  $\mu\text{l}$ , 0.12 mmol) was added successively while cooling to 0°C. After removing the ice bath, the red solution was stirred at rt overnight. The solvent was removed, and the raw mixture was purified by column chromatography (SiO<sub>2</sub>, Hexane : EtOAc = 8 : 1) and precipitation from chloroform and hexane. The product was obtained as a red solid (12.9 mg, 24.4  $\mu\text{mol}$ , 27%).

<sup>1</sup>H NMR (300 MHz, Chloroform-*d*)  $\delta$  = 8.03 – 7.92 (m, 2H), 7.18 – 7.05 (m, 2H), 7.03 – 6.95 (m, 7H), 6.94 – 6.86 (m, 2H), 6.79 – 6.70 (m, 4H), 3.13 (s, 6H), 2.27 (s, 3H) ppm.

<sup>13</sup>C NMR (126 MHz, Chloroform-*d*)  $\delta$  = 162.4, 153.5, 151.8, 144.5, 143.6, 142.4, 141.6, 137.7, 137.3, 135.3, 133.3, 132.2, 131.0, 130.3, 130.1, 128.7, 127.5, 126.8, 126.4, 116.2, 115.2, 112.0, 107.1, 40.7, 21.4 ppm.

<sup>19</sup>F NMR (471 MHz, Chloroform-*d*)  $\delta$  -113.74 (m), -124.34 (s) ppm.

HR-MS (APPI positive mode):  $m/z$  = calc. for ([M+H]<sup>+</sup>): 529.2198, found: 529.2205.

8-fluoro-5-(4-fluorophenyl)-6-phenyl-7-(p-tolyl)-2-((triisopropylsilyl)ethynyl)-1,2,3,4-tetrahydroquinazoline **13**

Sticky colorless oil, 11.9 mg, 20.2  $\mu\text{mol}$ , 16% yield.

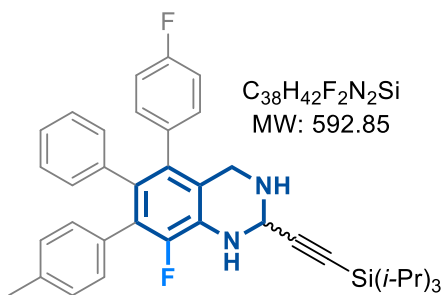

Diamine **11** (50.0 mg, 125  $\mu\text{mol}$ , 1.00 equiv.) and 3- (triisopropylsilyl)propionaldehyde (26.3 mg, 125  $\mu\text{mol}$  1.00 equiv.) were dissolved in 4 ml chloroform and  $\text{SiO}_2$  (37.5 mg, 634  $\mu\text{mol}$ , 5.00 equiv.) was added. The resulting suspension was stirred for 24 h, until TLC indicated full consumption of the starting material. The yellowish suspension was filtered, and the filter cake was washed with chloroform. After evaporation of the organic solvent,

the crude mixture was purified *via* column chromatography (Hexane : EtOAc = 16 : 1) to yield **13** as sticky colorless oil in 16% yield (11.9 mg, 20.2  $\mu\text{mol}$ ).

$^1\text{H}$  NMR (300 MHz, Acetone- $d_6$ )  $\delta$  = 7.14 – 6.58 (m, 13H), 5.66 (s, 1H), 5.21 – 5.08 (m, 1H), 3.99 (d,  $J$  = 17.0 Hz, 1H), 3.56 (d,  $J$  = 17.0 Hz, 1H), 2.21 (s, 3H), 1.07 (s, 21H) ppm.

$^{13}\text{C}$  NMR (126 MHz, Acetone- $d_6$ )  $\delta$  = 162.17, 148.49, 140.22, 136.79, 136.34, 134.71, 133.07, 132.85, 132.78, 132.57, 131.43, 128.92, 127.56, 127.23, 126.20, 121.47, 115.28, 115.09, 108.44, 101.46, 83.82, 21.30, 18.92, 18.90, 11.89 ppm.

$^{19}\text{F}$  NMR (471 MHz, Acetone- $d_6$ )  $\delta$  = -117.79, -141.23 ppm.

HR-MS (APPI positive mode):  $m/z$  = calc. for  $([\text{M}+\text{H}]^+)$ : 593.3158, found: 593.3161.

8-fluoro-5-(4-fluorophenyl)-2,2-dimethyl-6-phenyl-7-(p-tolyl)-1,2,3,4-tetrahydroquinazoline **14**

Off-white solid, 24.4 mg, 55.4  $\mu\text{mol}$ , 74% yield.

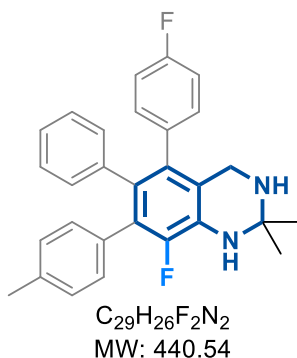

Diamine **11** (30 mg, 74.9  $\mu\text{mol}$ , 1.00 equiv.) was mixed with acetone (21 ml) and  $\text{SiO}_2$  (45.0 mg, 749  $\mu\text{mol}$ , 10.0 equiv.), the resulting mixture was heated to 50  $^\circ\text{C}$  for 3 d, till TLC indicated the complete conversion of the starting material. The silica was filtered off, washed three times with acetone and the solvent removed under reduced pressure. The off-white residue could be identified as desired product, which was obtained in 74% yield (24.4 mg, 55.4  $\mu\text{mol}$ ).

*VERY BAD SOLUABILITY!*

$^1\text{H}$  NMR (300 MHz, Acetone- $d_6$ )  $\delta$  = 7.07 – 6.99 (m, 2H), 6.97 – 6.82 (m, 9H), 6.78 – 6.73 (m, 2H), 5.25 (s, 1H), 3.62 (s, 2H), 2.21 (s, 3H), 1.41 (s, 6H) ppm.

$^{13}\text{C}$  NMR (126 MHz, Acetone- $d_6$ )  $\delta$  = 162.13, 147.87, 140.42, 136.68, 136.66, 134.60, 133.32, 132.94, 132.77, 132.25, 131.49, 129.36, 128.90, 127.54, 127.10, 126.05, 119.97, 115.11, 64.54, 42.57, 28.50, 21.08 ppm.

$^{19}\text{F}$  NMR (283 MHz, Acetone- $d_6$ )  $\delta$  = -117.79 – -117.95 (m), -142.02 ppm.

HR-MS (APPI positive mode):  $m/z$  = calc. for  $([\text{M}]^+)$ : 441.2137, found: 441.2134.

8-fluoro-5-(4-fluorophenyl)-6-phenyl-7-(p-tolyl)-2,2-bis(((3R,5aS,6R,8aS,9R,10S,12R,12aR)-3,6,9-trimethyldecahydro-12H-3,12-epoxy[1,2]dioxepino[4,3-i]isochromen-10-yl)oxy)methyl)-1,2,3,4-tetrahydroquinazoline  
**15**

White solid, 14.0 mg, 13.9  $\mu\text{mol}$ , 16% yield.

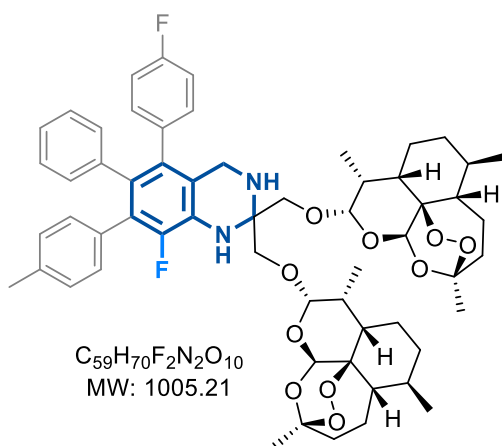

Diamine **11** (35.0 mg, 87.4  $\mu\text{mol}$ , 1.00 equiv.) and 1,3-bis(((3R,5aS,6R,8aS,9R,10S,12R,12aR)-3,6,9-trimethyldecahydro-12H-3,12-epoxy[1,2]dioxepino[4,3-i]isochromen-10-yl)oxy)propan-2-one (54.4 mg, 87.4  $\mu\text{mol}$ , 1.00 equiv.) were dissolved in 4 ml  $\text{CHCl}_3$  and  $\text{SiO}_2$  (26.3 mg, 437  $\mu\text{mol}$ , 5.00 equiv.) was added. The resulting suspension was stirred overnight until TLC indicated the consumption of the diamine, afterwards the solvent was evaporated under reduced pressure and the resulting mixture adsorbed on silica was purified *via* column

chromatography to obtain the desired product in 16% yield (14.0 mg, 13.9  $\mu\text{mol}$ ).

$^1\text{H}$  NMR (500 MHz, Methylene Chloride- $d_2$ )  $\delta$  7.01 – 6.94 (m, 6H), 6.92 – 6.87 (m, 3H), 6.87 – 6.81 (m, 2H), 6.79 – 6.69 (m, 2H), 5.41 (s, 1H), 5.37 (s, 1H), 4.85 (d,  $J = 3.5$  Hz, 1H), 4.79 (d,  $J = 3.5$  Hz, 1H), 4.65 (s, 1H), 4.04 (d,  $J = 9.6$  Hz, 1H), 3.82 (d,  $J = 10.1$  Hz, 1H), 3.64 (d,  $J = 3.7$  Hz, 2H), 3.59 (d,  $J = 10.1$  Hz, 1H), 3.35 (d,  $J = 9.6$  Hz, 1H), 2.66 – 2.53 (m, 2H), 2.40 – 2.28 (m, 2H), 2.25 (s, 3H), 2.05 – 1.97 (m, 2H), 1.92 – 1.82 (m, 2H), 1.84 – 1.42 (m, 10H), 1.39 – 1.21 (m, 10H), 0.99 – 0.88 (m, 14H).

$^{13}\text{C}$  NMR (126 MHz,  $\text{CD}_2\text{Cl}_2$ )  $\delta$  161.93, 147.65, 139.81, 136.98, 135.69, 134.24, 132.50, 132.45, 131.12, 130.43, 130.32, 128.68, 127.30, 127.21, 125.88, 120.53, 114.95, 104.54, 104.50, 103.41, 103.09, 88.53, 88.49, 83.11, 81.44, 81.43, 71.02, 70.11, 68.59, 44.85, 44.83, 41.44, 41.37, 37.99, 37.00, 35.17, 34.41, 31.56, 28.96, 26.42, 25.38, 25.17, 25.14, 24.15, 21.40, 21.12, 20.74, 20.72, 17.83, 17.77, 14.97, 13.47, 13.41, 8.23.

$^{19}\text{F}$  NMR (471 MHz,  $\text{CD}_2\text{Cl}_2$ )  $\delta$  -116.93, -142.41.

HR-MS (APPI):  $m/z$  = calc. for ( $[\text{M}]^+$ ): 1005.5071, found: 1005.5070.

8-fluoro-5-(4-fluorophenyl)-6-phenyl-7-(p-tolyl)-2-(4-(((3S,5aR,6S,8aR,9S,10R,12S,12aS)-3,6,9-trimethyldecahydro-12H-3,12-epoxy[1,2]dioxepino[4,3-*i*]isochromen-10-yl)oxy)phenyl)quinazoline **16**

White solid, 15.6 mg, 20.3  $\mu\text{mol}$ , 63% yield.

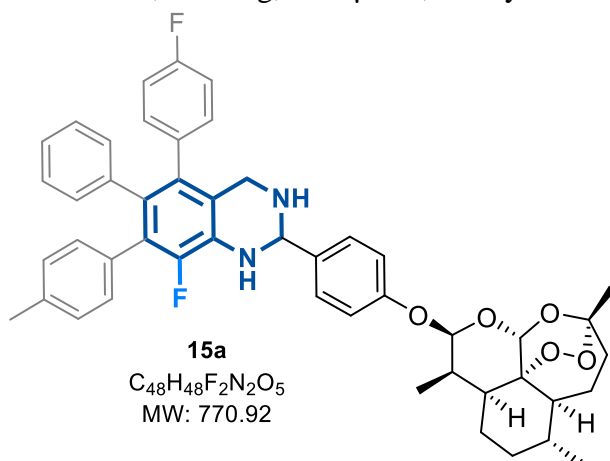

10 : 1). To obtain the tetrahydro-quinazoline intermediate **15a** in 52% yield (50.1 mg, 65.0  $\mu\text{mol}$ ).

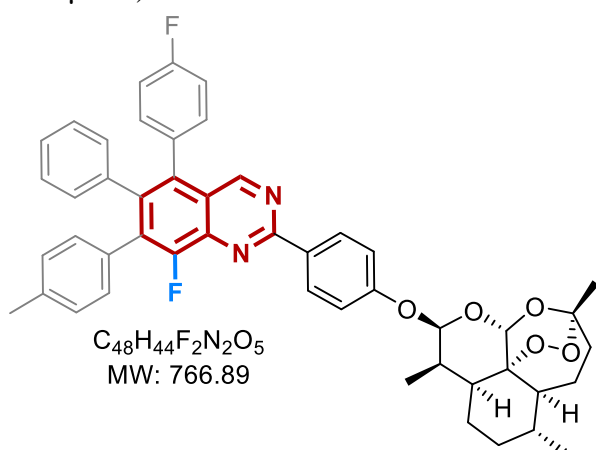

pure product was obtained *via* column chromatography (Hexane : EtOAc = 10 : 1) in 63% yield (15.6 mg, 20.3  $\mu\text{mol}$ ).

*Modified after procedure.*<sup>[25]</sup>

$^1\text{H}$  NMR (500 MHz, Methylene Chloride- $d_2$ )  $\delta$  = 9.14 (d,  $J$  = 1.4 Hz, 1H), 8.65 – 8.59 (m, 2H), 7.28 – 7.20 (m, 2H), 7.17 – 7.13 (m, 2H), 7.08 (s, 4H), 7.04 – 6.96 (m, 5H), 6.90 – 6.83 (m, 2H), 5.62 (d,  $J$  = 3.5 Hz, 1H), 5.49 (s, 1H), 2.82 – 2.76 (m, 1H), 2.40 – 2.32 (m, 1H), 2.31 (s, 3H), 2.06 – 1.95 (m, 2H), 1.93 – 1.86 (m, 1H), 1.76 – 1.70 (m, 1H), 1.64 – 1.58 (m, 1H), 1.52 – 1.42 (m, 2H), 1.41 – 1.29 (m, 5H), 1.06 (d,  $J$  = 7.3 Hz, 3H), 1.03 (d,  $J$  = 7.4 Hz, 1H), 0.97 (d,  $J$  = 6.3 Hz, 3H) ppm.

$^{13}\text{C}$  NMR (126 MHz, Methylene Chloride- $d_2$ )  $\delta$  = 162.60, 161.13, 160.62, 160.10, 153.98, 141.14, 140.88, 138.43, 138.09, 134.53, 133.54, 133.35, 132.62, 131.88, 131.72, 131.33, 130.85, 130.83, 129.02, 127.75, 126.99, 123.37, 117.09, 115.40, 104.70, 100.59, 88.90, 81.41, 53.17, 44.95, 38.00, 36.91, 35.22, 31.55, 26.32, 25.21, 25.04, 21.51, 20.64, 13.27 ppm.

$^{19}\text{F}$  NMR (471 MHz, Methylene Chloride- $d_2$ )  $\delta$  = -115.40, -129.12 ppm.

HR-MS (ESI positive mode):  $m/z$  = calc. for  $([\text{M}+\text{H}]^+)$ : 767.329105, found: 767.329733.



8-fluoro-5-(4-fluorophenyl)-6-phenyl-7-(p-tolyl)-2-((triisopropylsilyl)ethynyl)quinazoline **17**

Off-yellow solid, 22.2 mg, 37.7  $\mu\text{mol}$ , 30% yield.

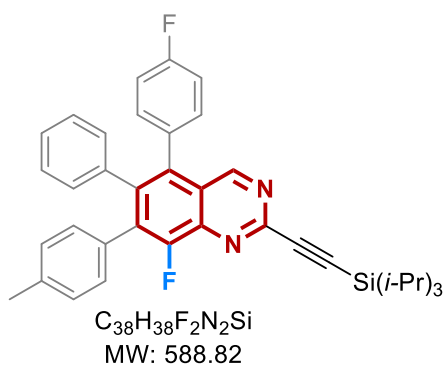

Diamine **11** (50.0 mg, 125  $\mu\text{mol}$ , 1.00 equiv.) and 3-(triisopropylsilyl)propionaldehyde (26.3 mg, 125  $\mu\text{mol}$ , 1.00 equiv.) were dissolved in 1.5 ml DMF and Rose Bengal (6.08 mg, 6.24  $\mu\text{mol}$ , 0.05 equiv.) was added, and the resulting mixture irradiated with white light source under oxygen atmosphere overnight. After TLC showed the consumption of the diamine, the pink reaction mixture was poured onto a mixture of saturated  $\text{NH}_4\text{Cl}$  and water (1:1, 15 ml) and the aqueous phase was extracted three times with  $\text{Et}_2\text{O}$  (70 ml). The organic phases were combined, dried

over  $\text{MgSO}_4$  and the solvent was evaporated under reduced pressure. The pure product was obtained *via* column chromatography (Hexane :  $\text{EtOAc}$  = 16 : 1) in 30% yield (22.2 mg, 37.7  $\mu\text{mol}$ ).

$^1\text{H}$  NMR (500 MHz, Acetone- $d_6$ )  $\delta$  = 9.04 (d,  $J$  = 1.5 Hz, 1H), 7.34 – 7.25 (m, 2H), 7.14 – 7.05 (m, 6H), 7.05 – 6.99 (m, 3H), 6.99 – 6.94 (m, 2H), 2.26 (s, 3H), 1.27 – 1.14 (m, 21H) ppm.

$^{13}\text{C}$  NMR (126 MHz, Acetone- $d_6$ )  $\delta$  = 163.01, 160.27, 153.57, 149.37, 143.30, 140.77, 138.58, 138.30, 135.13, 134.37, 134.16, 132.72, 131.91, 131.44, 131.14, 129.35, 128.10, 127.58, 123.91, 115.71, 107.09, 90.95, 21.16, 18.96, 11.99 ppm.

$^{19}\text{F}$  NMR (471 MHz, Acetone- $d_6$ )  $\delta$  = -115.75, -127.88 ppm.

HR-MS (APPI positive mode):  $m/z$  = calc. for  $([\text{M}+\text{H}]^+)$ : 589.2845, found: 589.2862.

## 8-fluoro-5-(4-fluorophenyl)-2,6-diphenyl-7-(*p*-tolyl)quinazoline **18**

White solid, 23.5 mg, 48.0  $\mu\text{mol}$ , 65% yield.

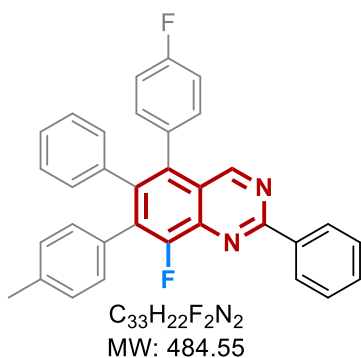

Diamine **11** (30.0 mg, 74.9  $\mu\text{mol}$ , 1.00 equiv.) and benzaldehyde (7.95 mg, 7.64  $\mu\text{l}$ , 74.9  $\mu\text{mol}$ , 1.00 equiv.) were dissolved in 1 ml DMF and Rose Bengal (3.65 mg, 3.75  $\mu\text{mol}$ , 0.05 equiv.) was added, and the resulting mixture irradiated with white light source under oxygen atmosphere overnight. After TLC showed the consumption of the diamine, the pink reaction mixture was poured onto a mixture of saturated  $\text{NH}_4\text{Cl}$  and water (1:1, 7 ml) and the aqueous phase was extracted 3 times with  $\text{Et}_2\text{O}$  (30 ml). The organic phases were combined, dried over  $\text{MgSO}_4$  and the solvent was evaporated under reduced pressure. The pure

product was obtained *via* column chromatography (Hexane :  $\text{EtOAc}$  = 10 : 1) in 65% yield (23.5 mg, 48.0  $\mu\text{mol}$ ).

*Modified after procedure.*<sup>[25]</sup>

$^1\text{H}$  NMR (500 MHz, Methylene Chloride- $d_2$ )  $\delta$  = 9.18 (d,  $J$  = 1.5 Hz, 1H), 8.70 – 8.62 (m, 2H), 7.59 – 7.50 (m, 3H), 7.21 – 7.13 (m, 2H), 7.08 (s, 4H), 7.04 – 6.95 (m, 5H), 6.90 – 6.84 (m, 2H), 2.31 (s, 3H) ppm.

$^{13}\text{C}$  NMR (126 MHz, Methylene Chloride- $d_2$ )  $\delta$  = 162.63, 161.39, 160.21, 154.08, 141.37, 141.10, 138.36, 138.19, 138.15, 134.55, 133.54, 133.47, 132.54, 131.69, 131.55, 131.25, 130.84, 129.23, 129.20, 129.05, 127.78, 127.04, 123.64, 115.44, 21.51 ppm.

$^{19}\text{F}$  NMR (471 MHz, Methylene Chloride- $d_2$ )  $\delta$  = -115.32, -128.85 ppm.

HR-MS (ESI positive mode):  $m/z$  = calc. for ( $[\text{M}+\text{H}]^+$ ): 485.182382, found: 485.182350.

<sup>1</sup>H, <sup>13</sup>C and <sup>19</sup>F-NMR-spectra of 9 in CD<sub>2</sub>Cl<sub>2</sub>

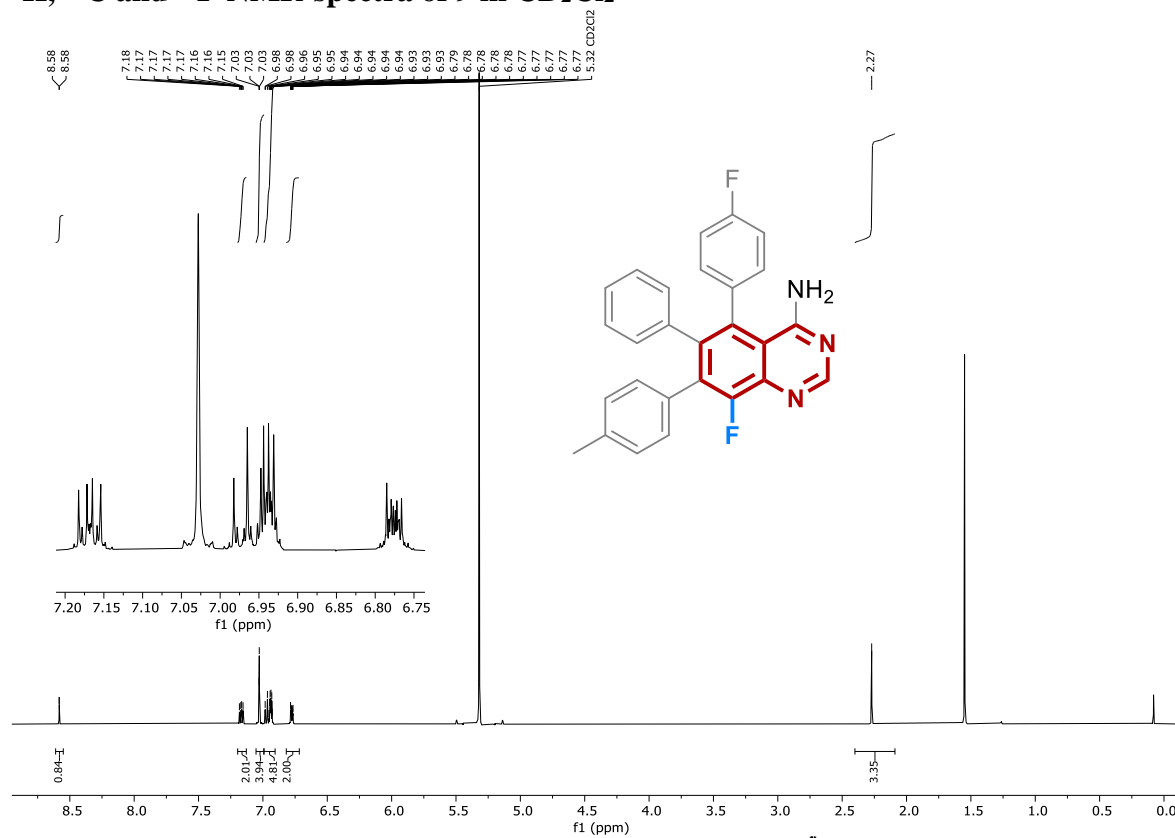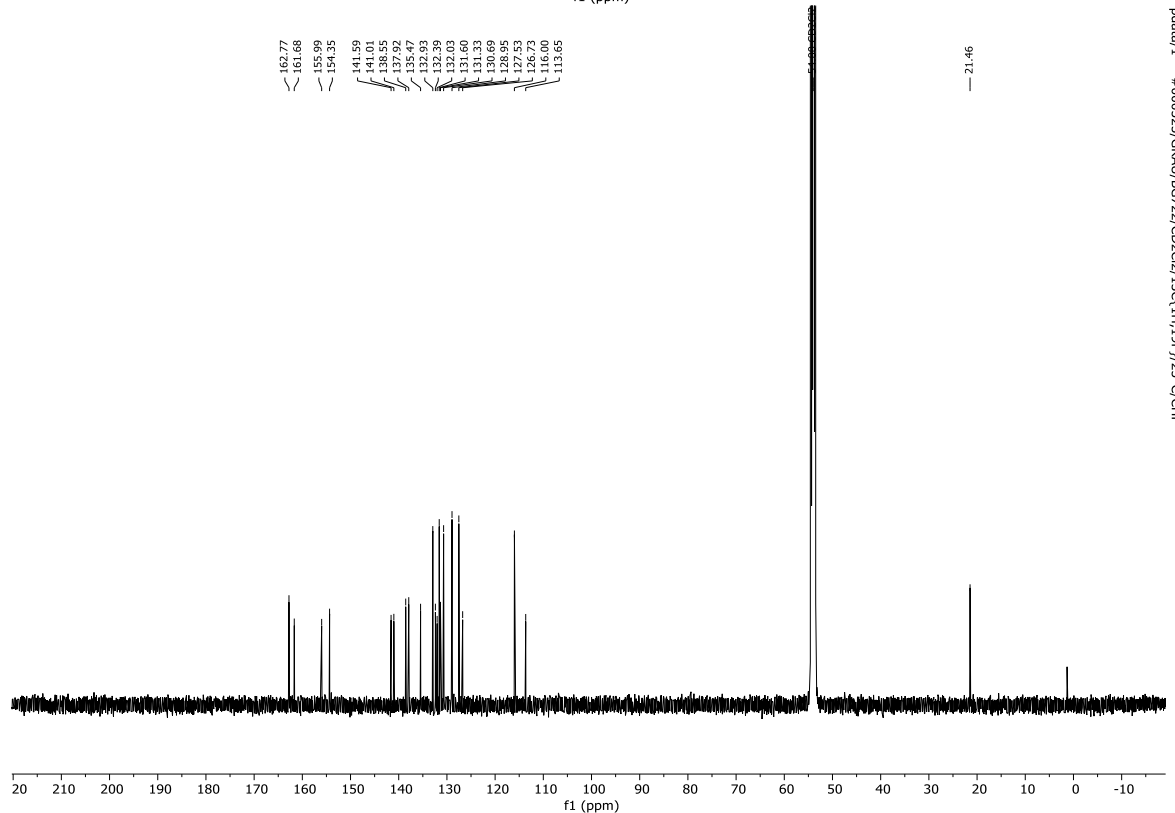

pdata/1 — #000525/GRAU/BG722/CD2Cl2/1H/25°C/CHP

pdata/1 — #000525/GRAU/BG722/CD2Cl2/13C/1H,19F/25°C/CHP

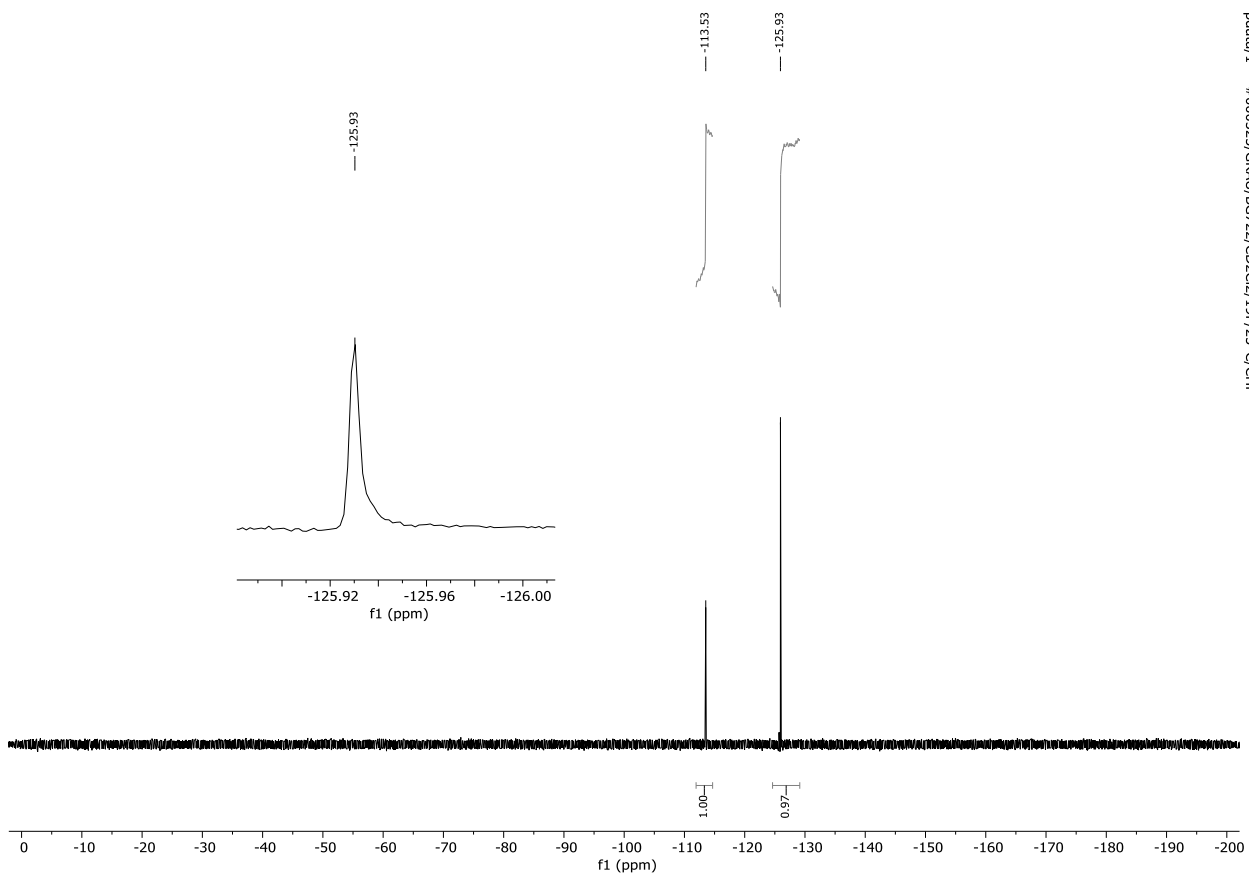

$^1\text{H}$ ,  $^{13}\text{C}$  and  $^{19}\text{F}$ -NMR-spectra of 10 in  $\text{CD}_2\text{Cl}_2$

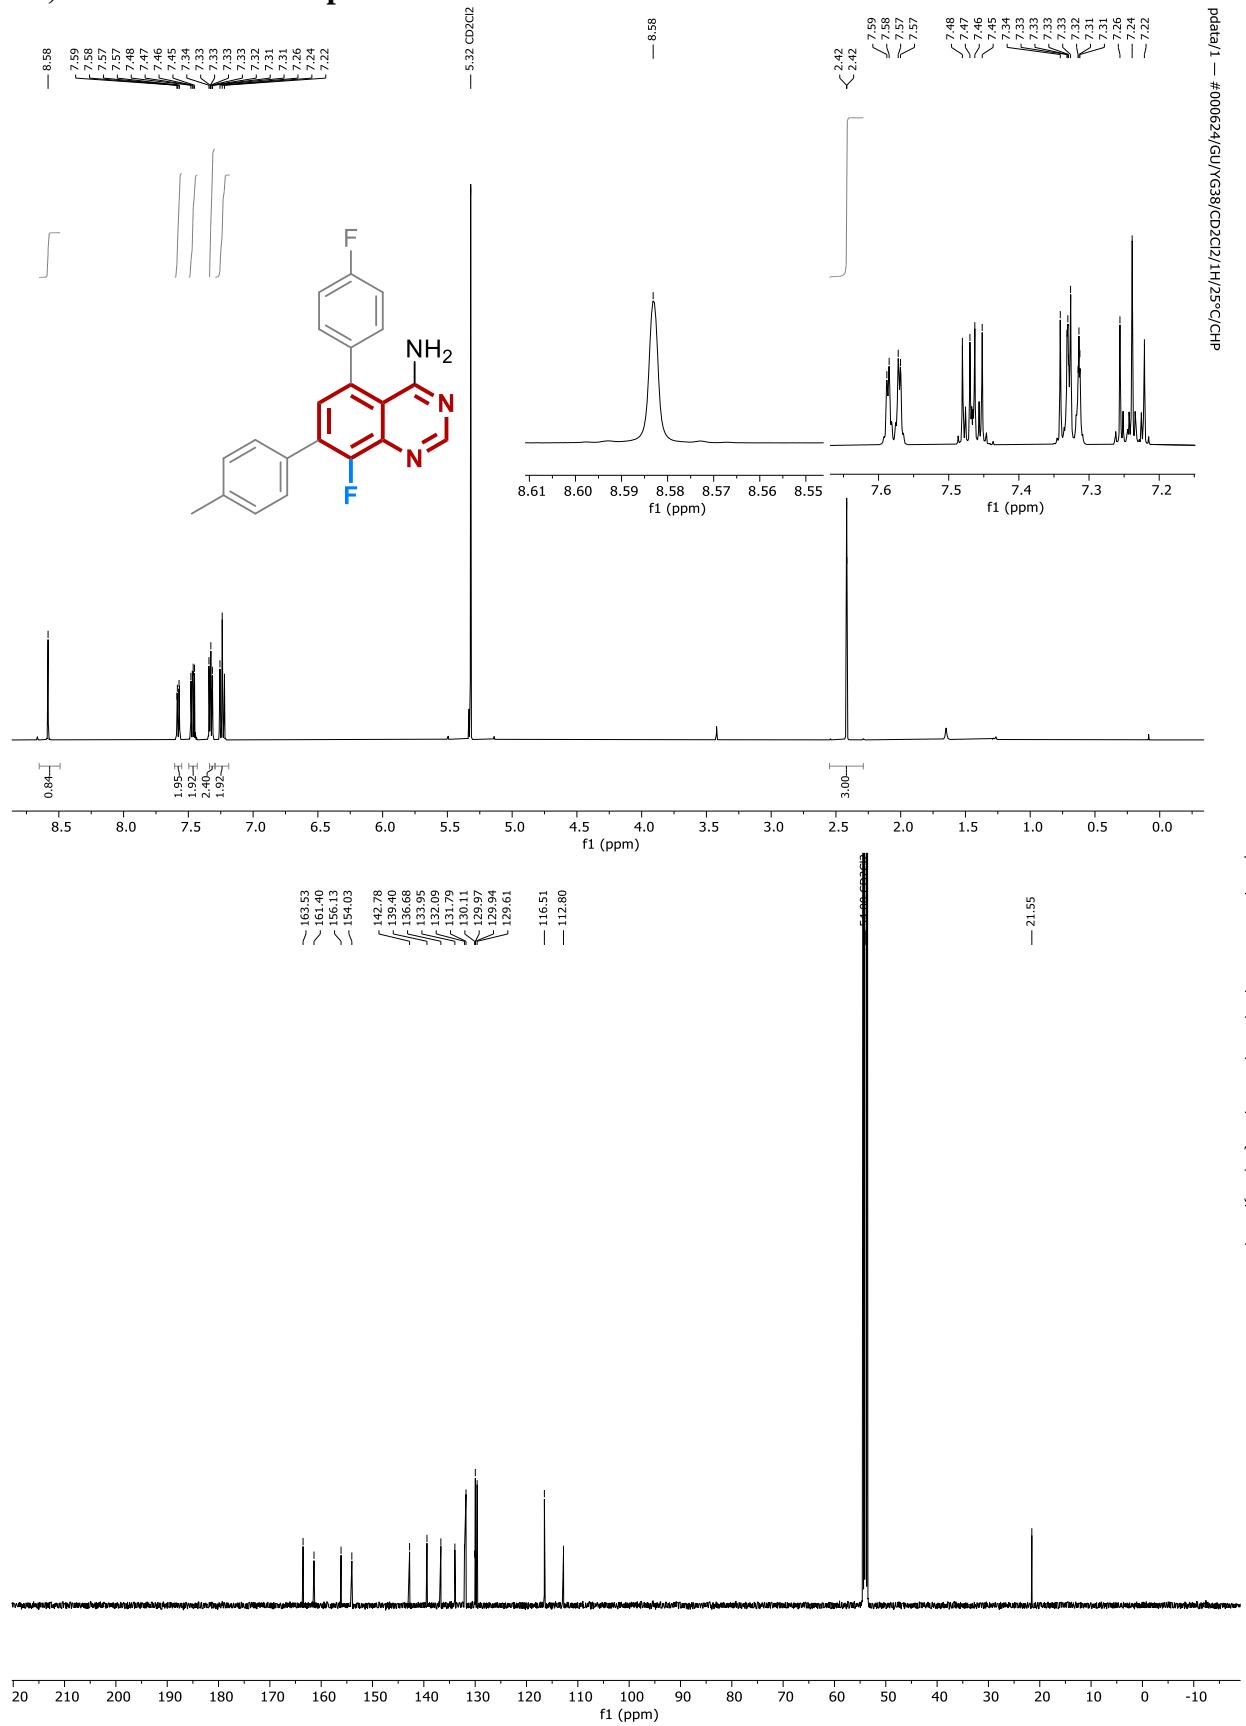

pdata/1 — #000624/GU/YG38/CD2Cl2/1H/25°C/CHP

pdata/1 — #000624/GU/YG38/CD2Cl2/13C(1H,19F)/25°C/CHP

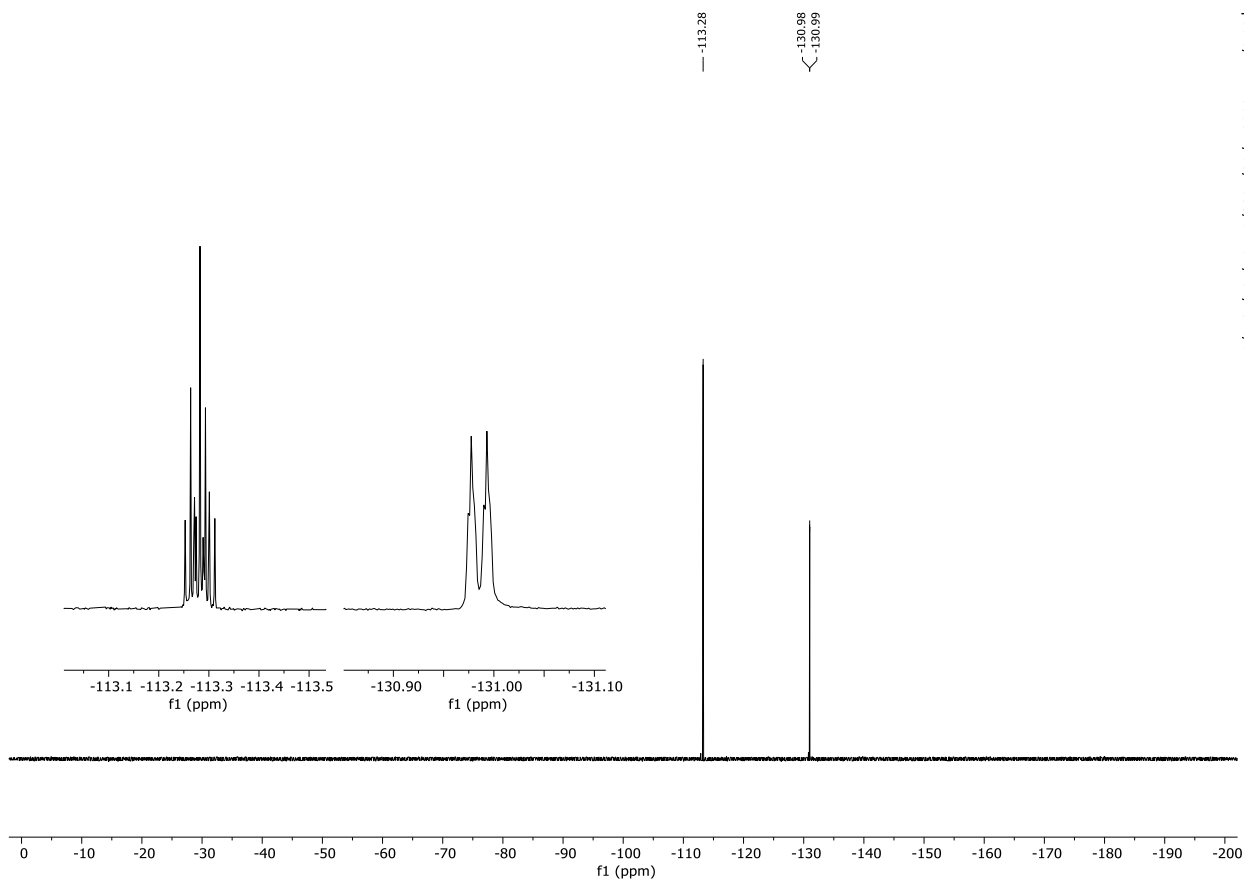

**<sup>1</sup>H, <sup>13</sup>C and <sup>19</sup>F-NMR-spectra of 11 in CD<sub>3</sub>CN**

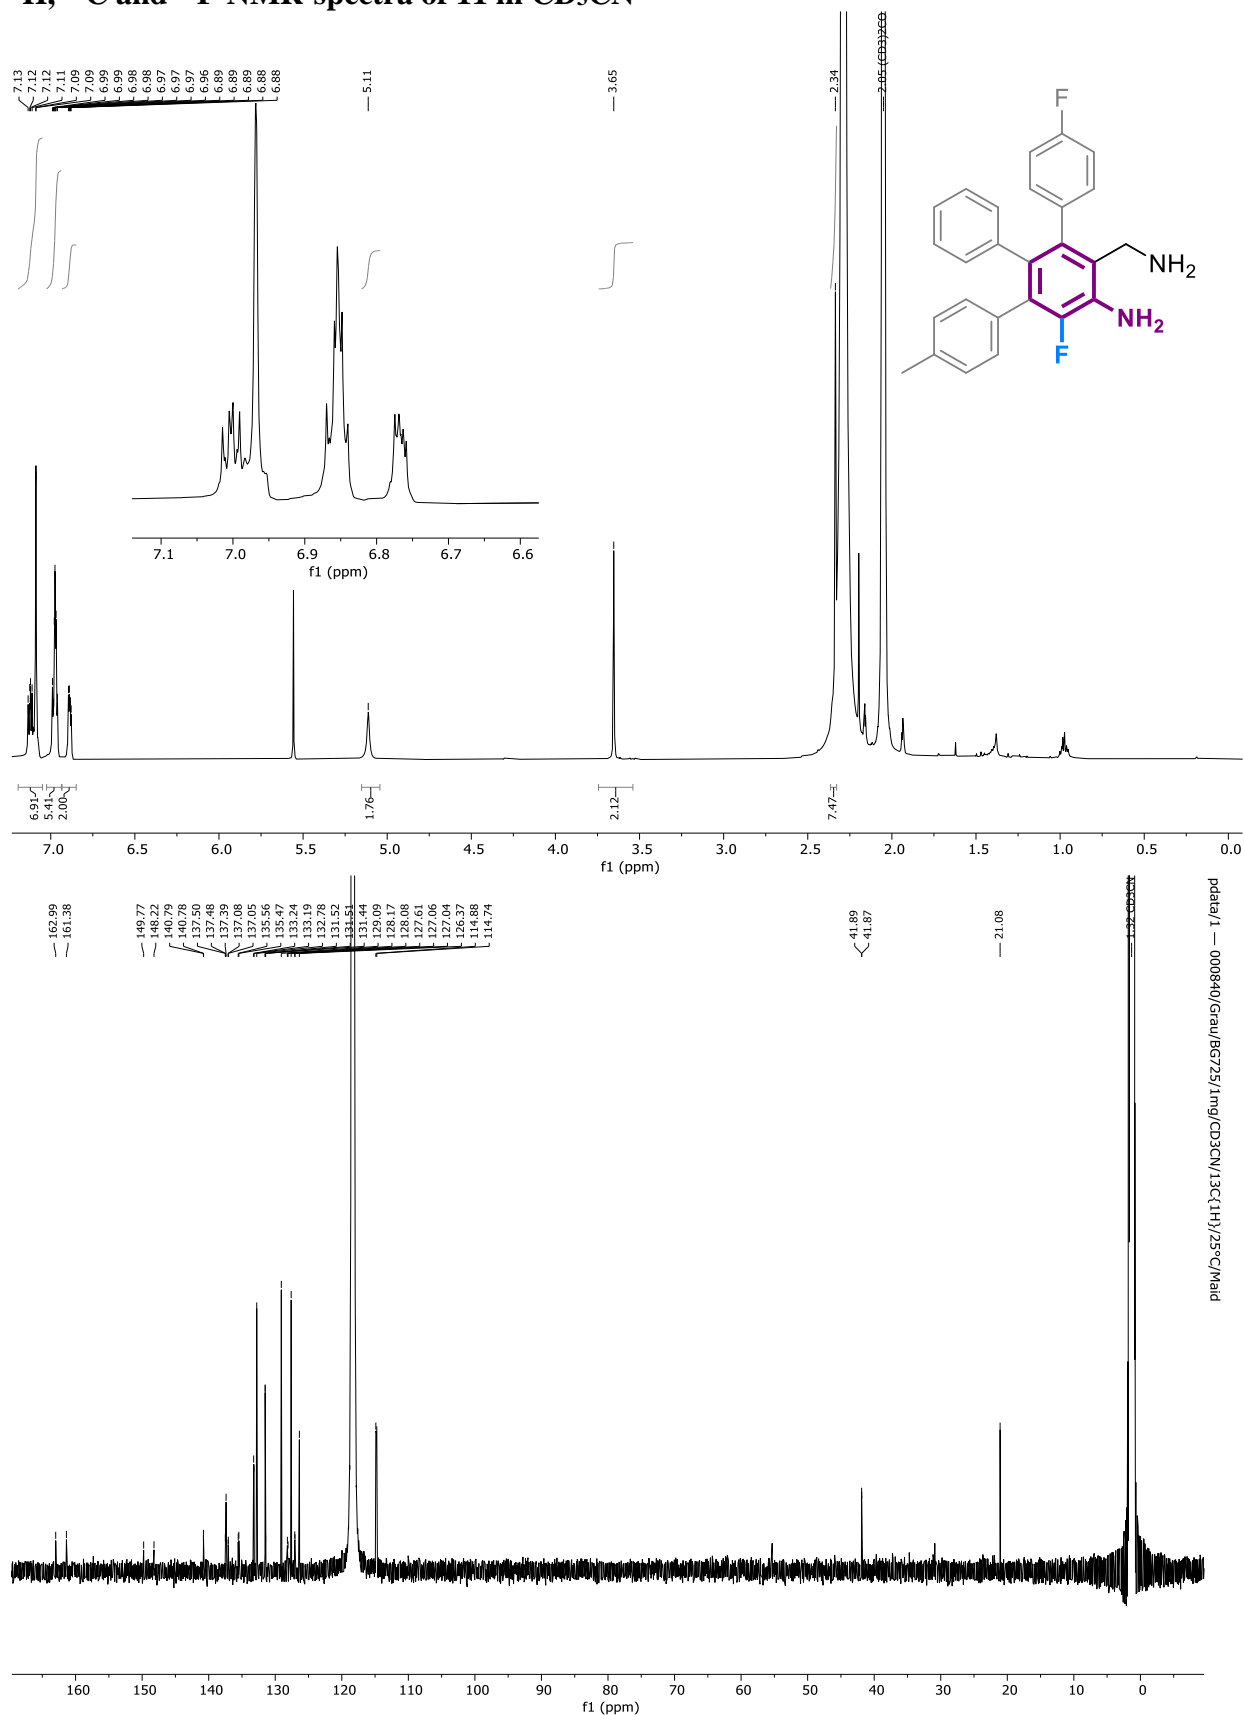

pdata/1 — 000840/Grau/BG725/1mg/CD3CN/1H/25°C/Mald

pdata/1 — 000840/Grau/BG725/1mg/CD3CN/13C(1H)/25°C/Mald

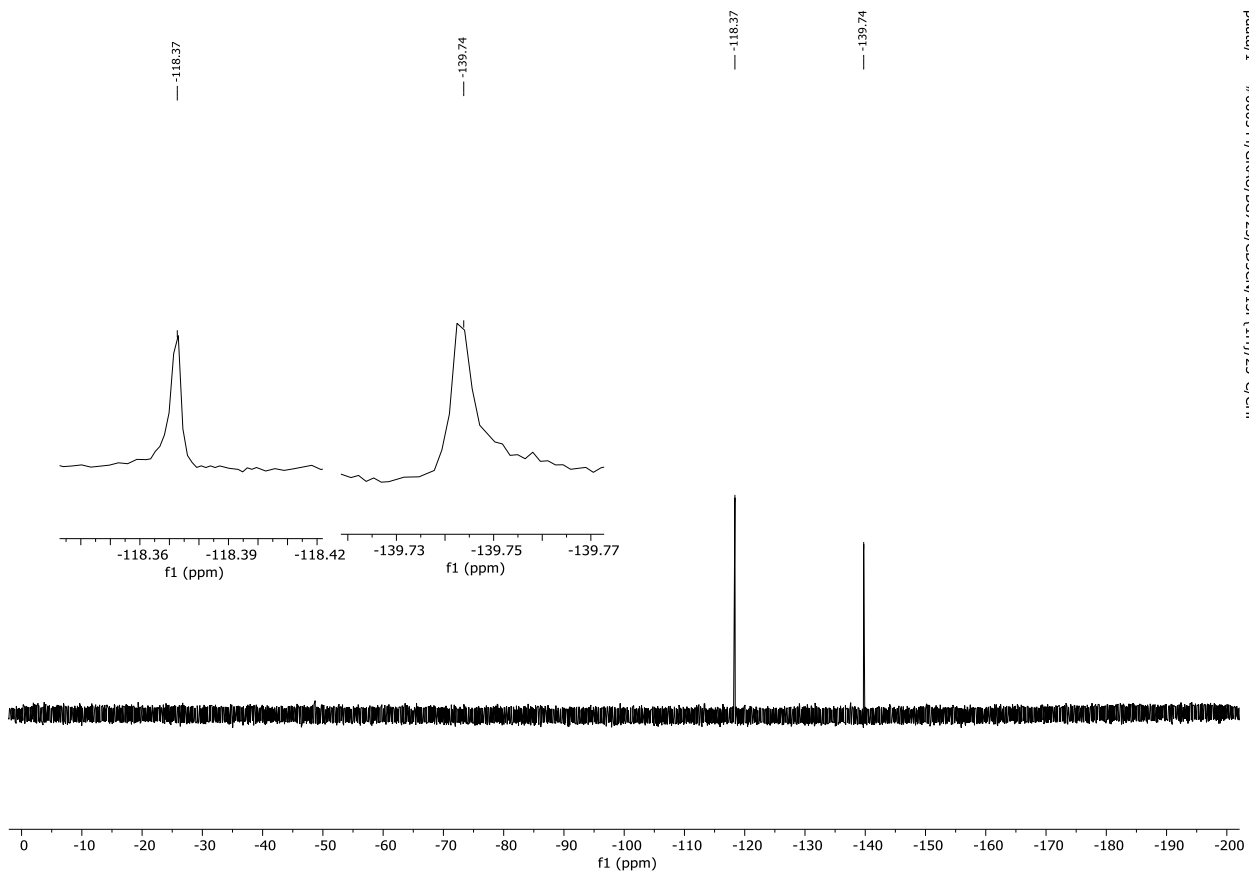

plate1 / #000544/GRAU/BGZ25/CD3CN/13F(1H)/25°C/CHP



<sup>1</sup>H, <sup>13</sup>C and <sup>19</sup>F-NMR-spectra of 12 in CDCl<sub>3</sub>

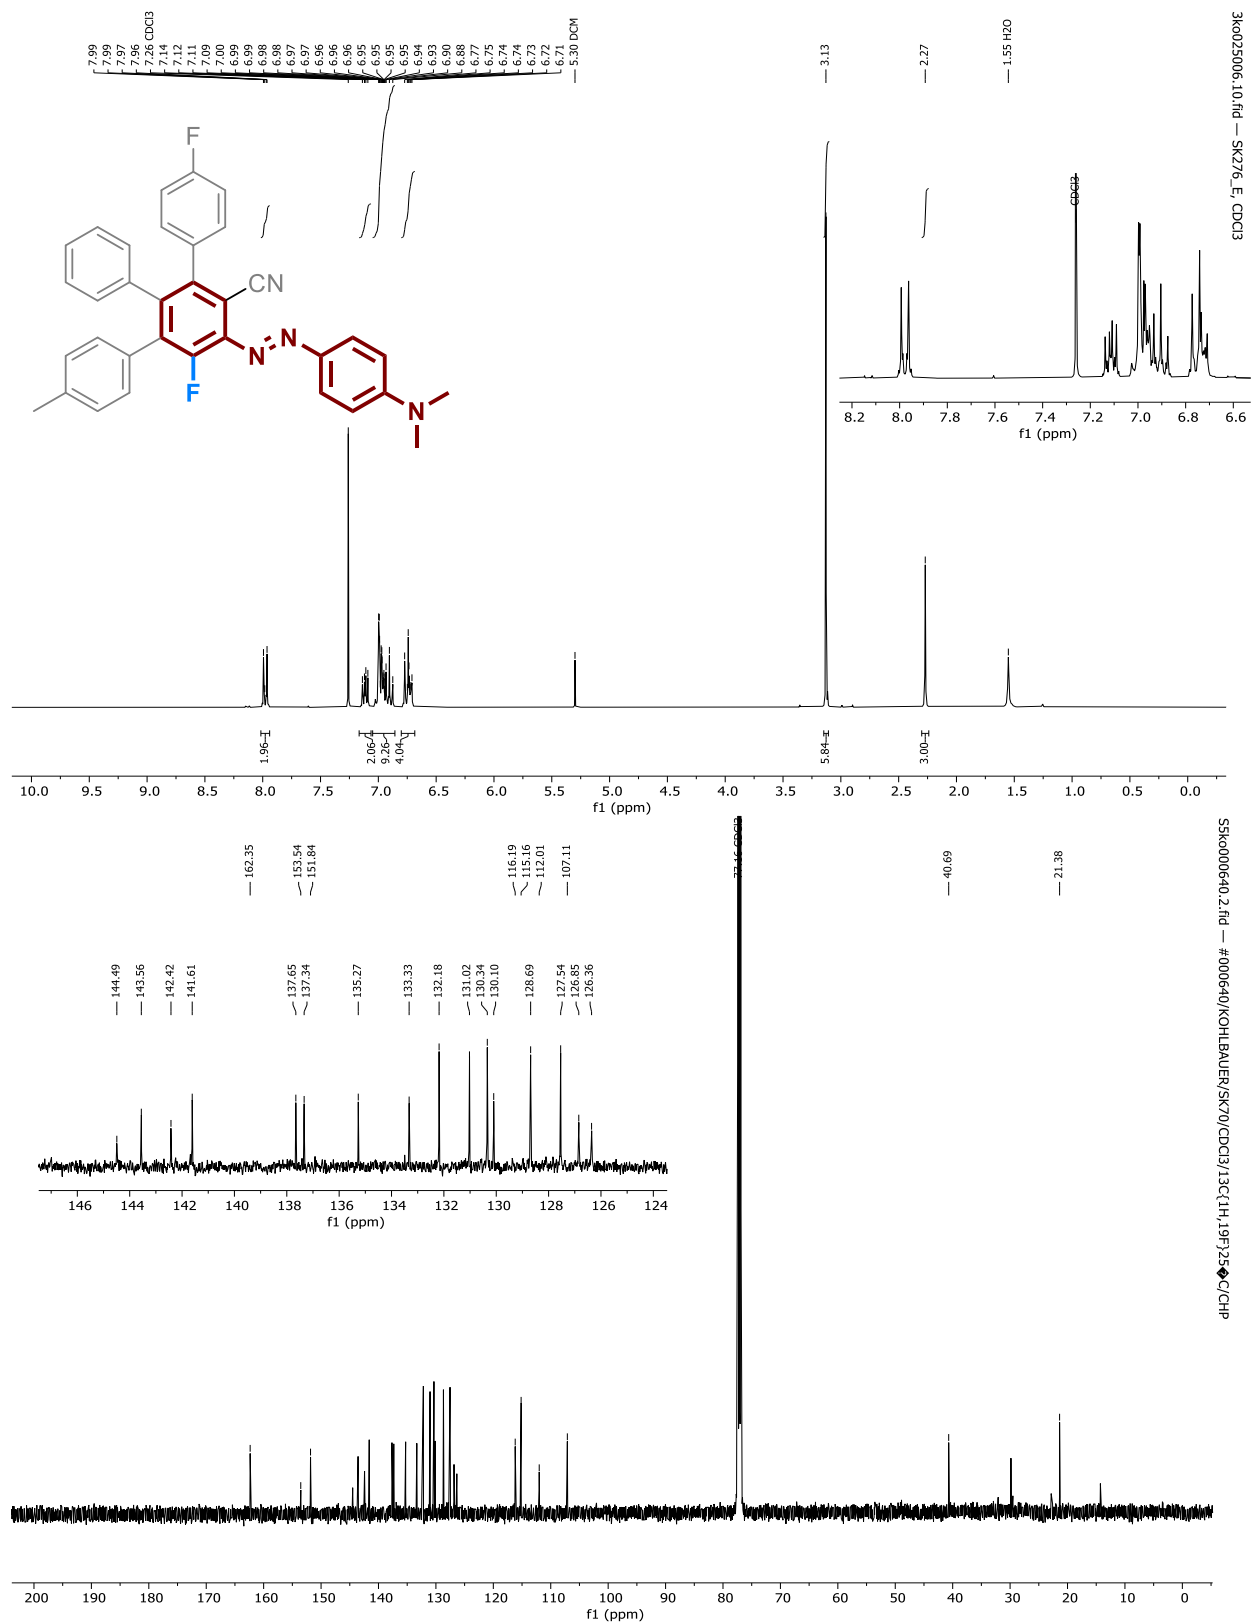

3ko025006.10.fid — SK276\_E, CDCl3

5Sik0000640.2.fid — #000640/KOHLBAUER/SK70/CDCl3/13C(1H,19F)25°C/GHP

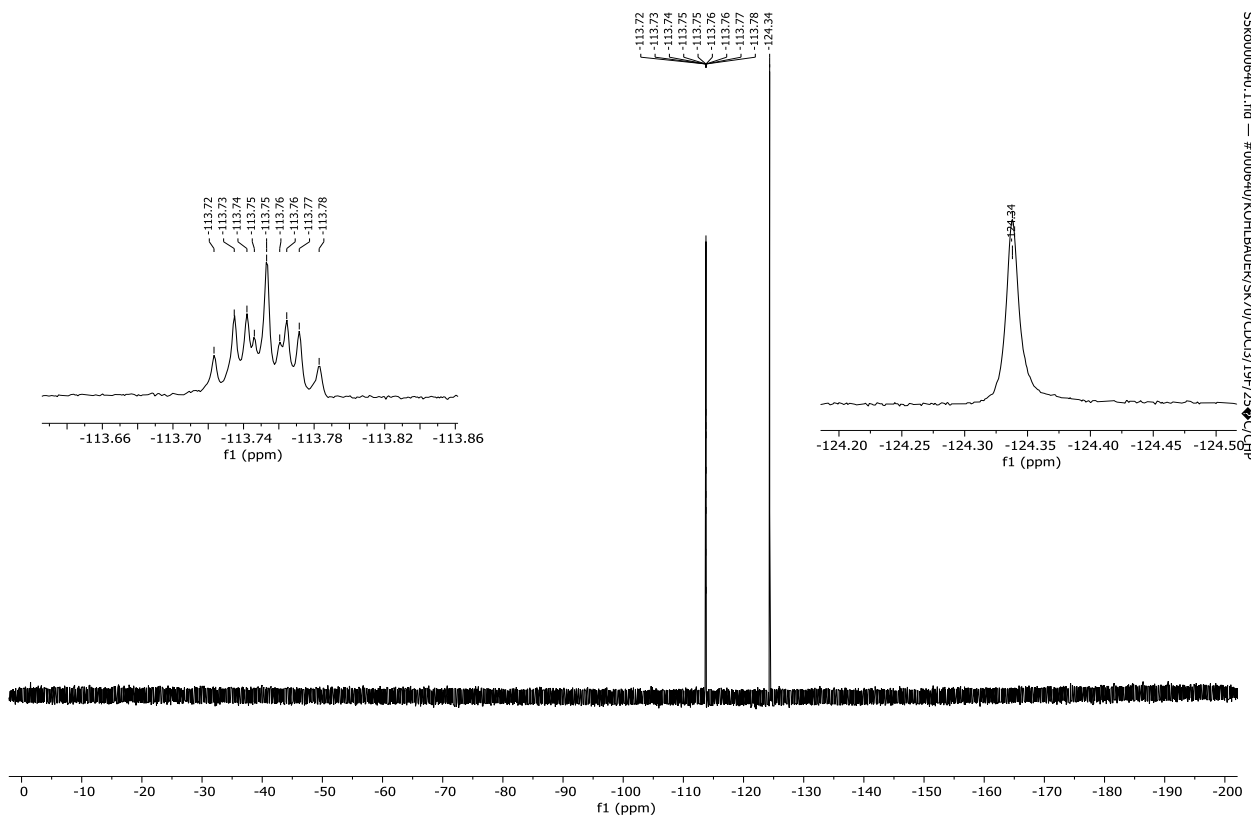

SSK0000640.1.fid — #000640/KOHLBAUER/SV70/CDC13/19F/25°C/CHP

<sup>1</sup>H, <sup>13</sup>C and <sup>19</sup>F-NMR-spectra of 13 in acetone-d<sub>6</sub>

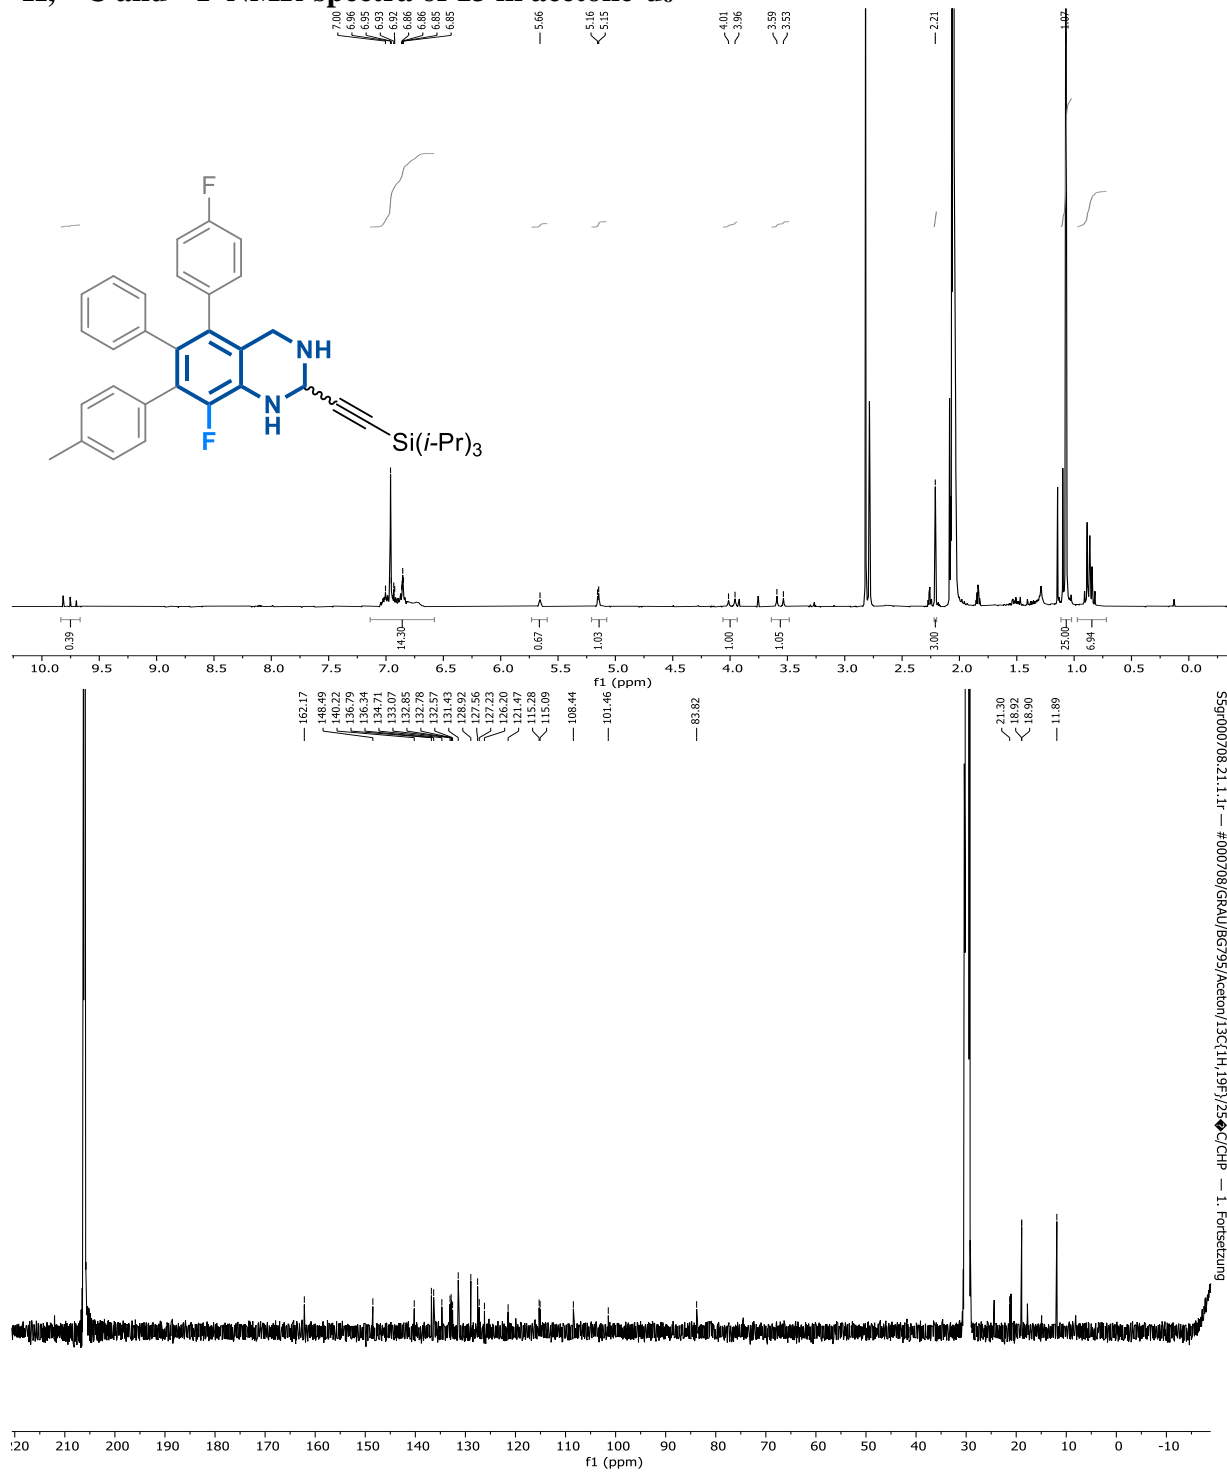

39f013700.10.1.1f - B6795dried

S59f000708.21.1.1f - #000708/GRAU/B6795/Acetone/<sup>13</sup>C(<sup>1</sup>H,<sup>19</sup>F)/25°C/CHP - 1. Fortsetzung

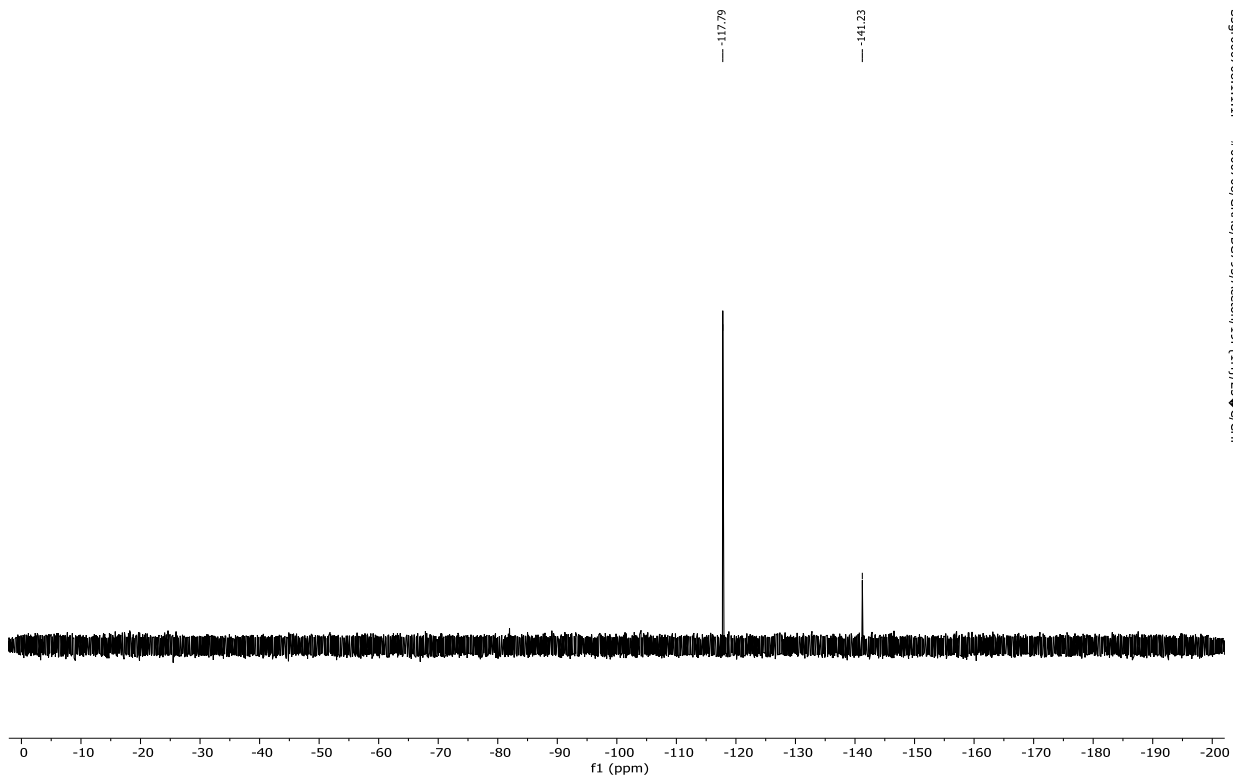

S59f000708.1.1.f1 - #000708/GRAU/BS795/Aceton/19F(1H)/25°C/CHP

<sup>1</sup>H, <sup>13</sup>C and <sup>19</sup>F-NMR-spectra of 14 in acetone-d<sub>6</sub>

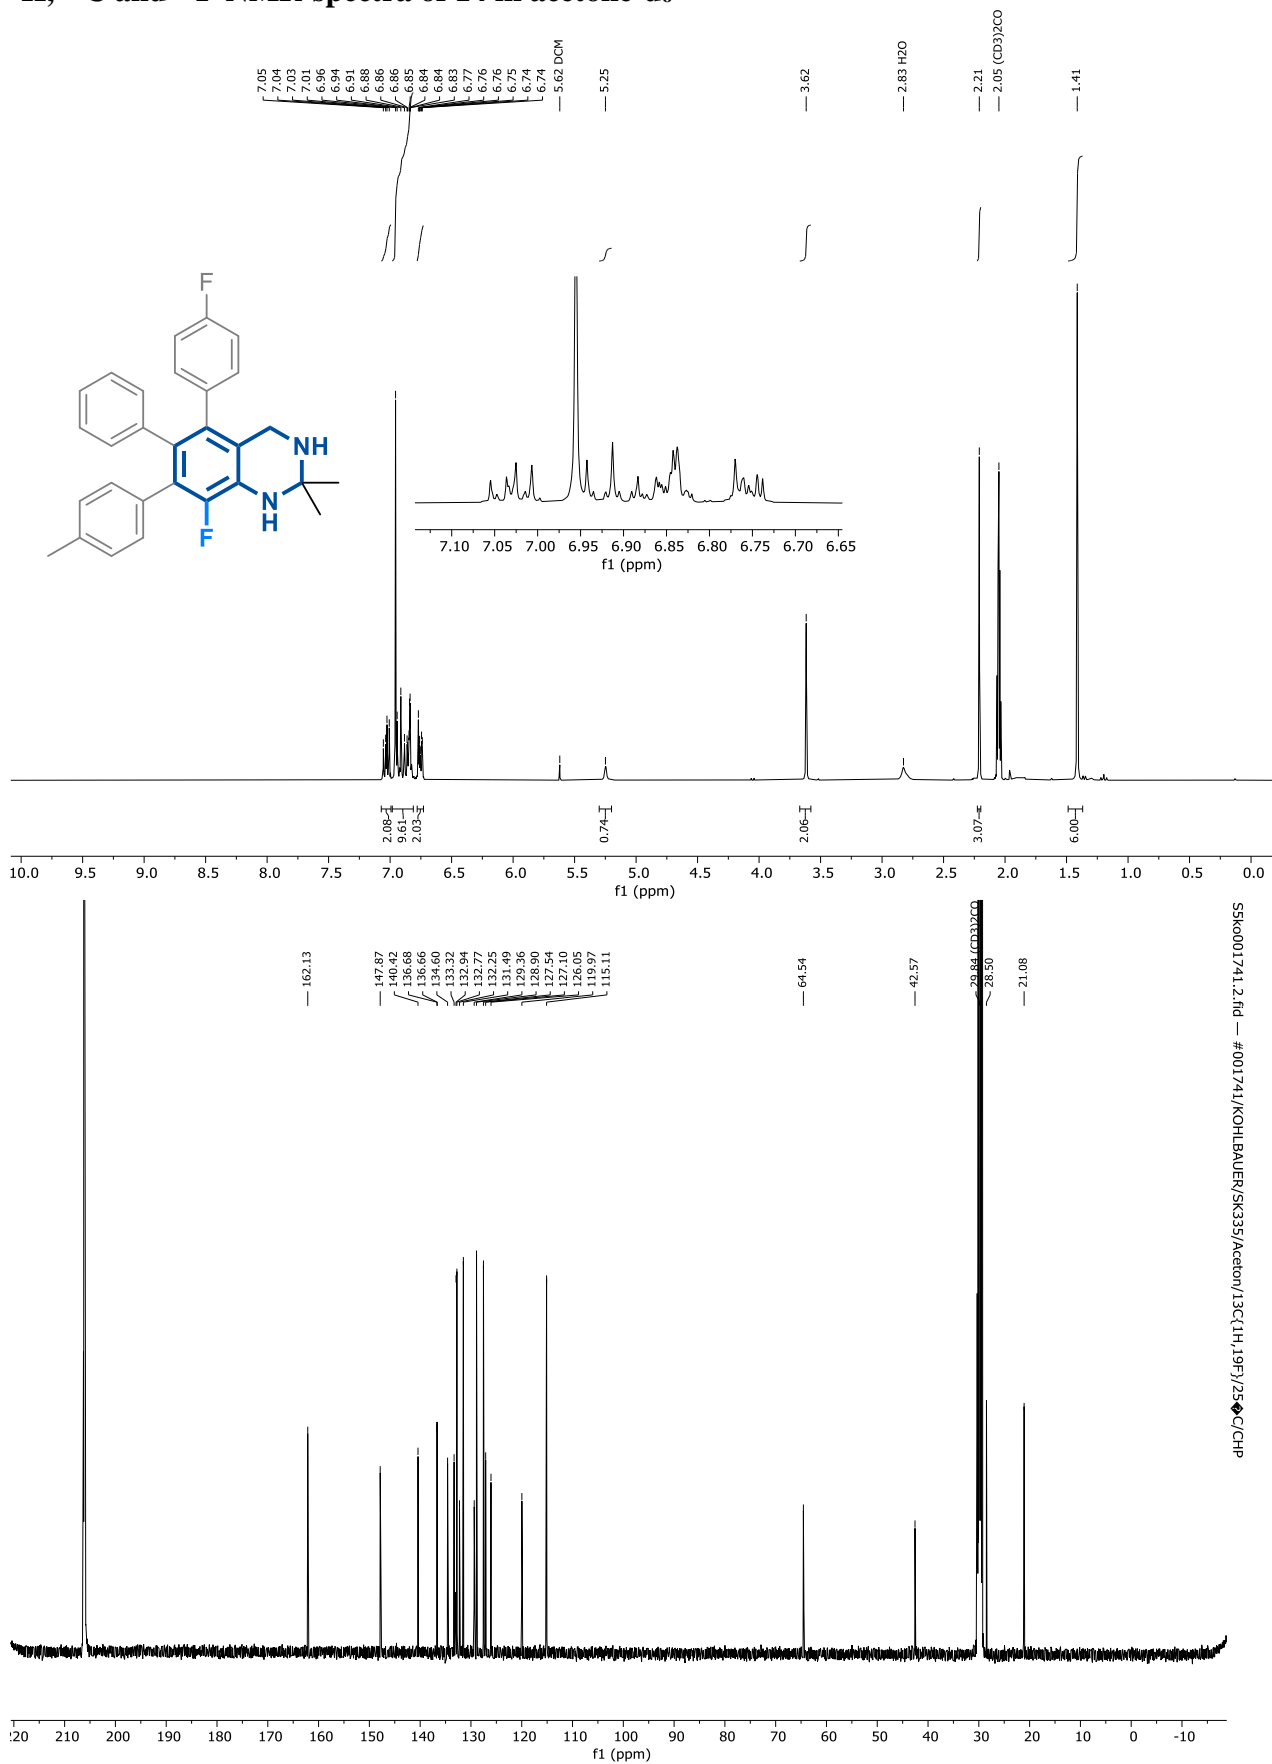

3k0028875\_10.fid — SK335, Acetone-d6

SK3001741\_2.fid — #001741/KOHLBAUER/SK335/Acetone/<sup>13</sup>C(1H,19F)/25°C/CHP

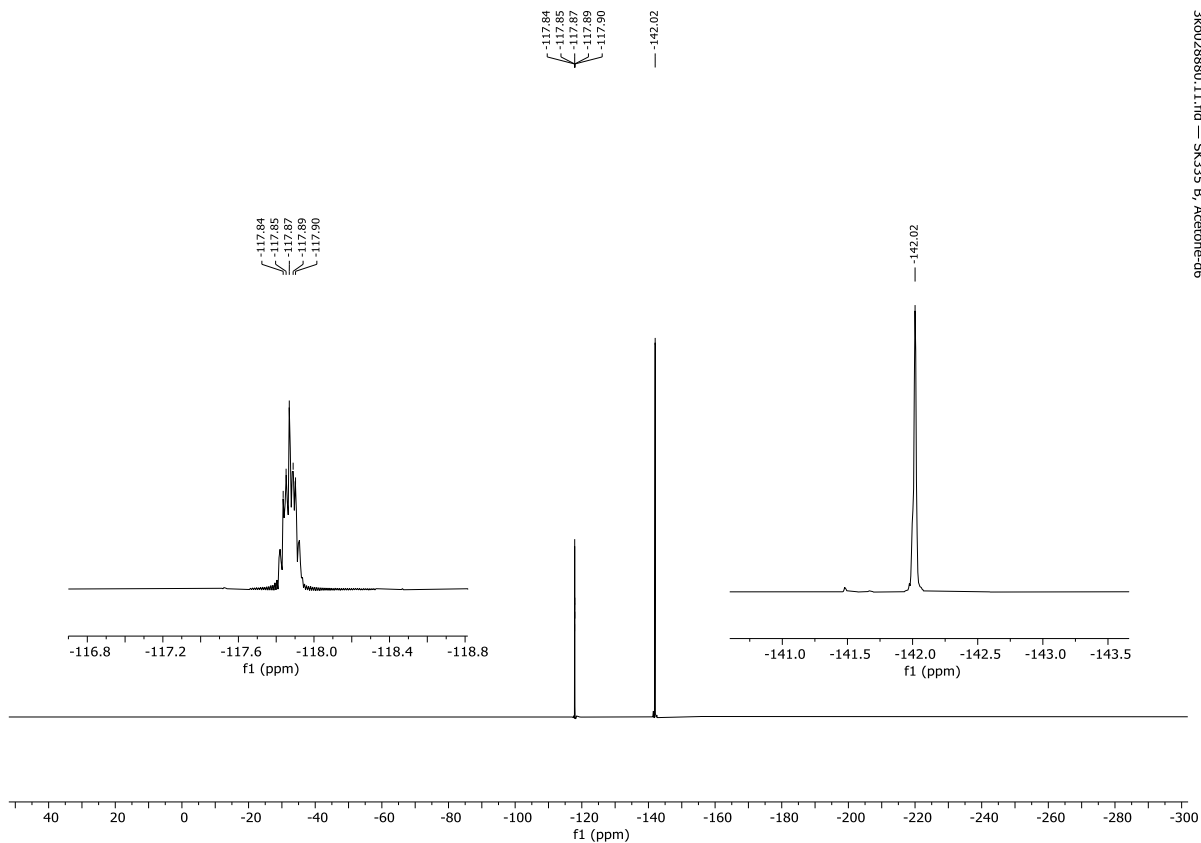

$^1\text{H}$ ,  $^{13}\text{C}$  and  $^{19}\text{F}$ -NMR-spectra of 15 in  $\text{CD}_2\text{Cl}_2$

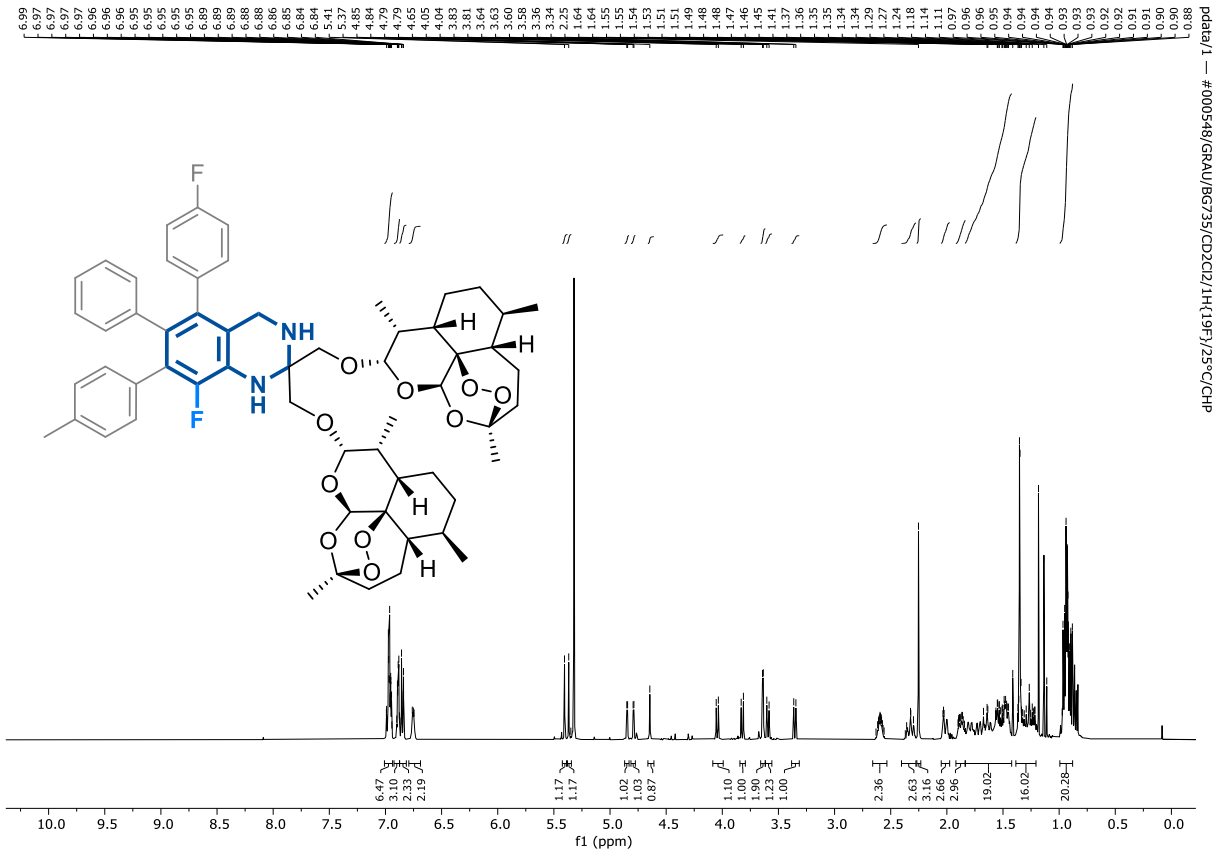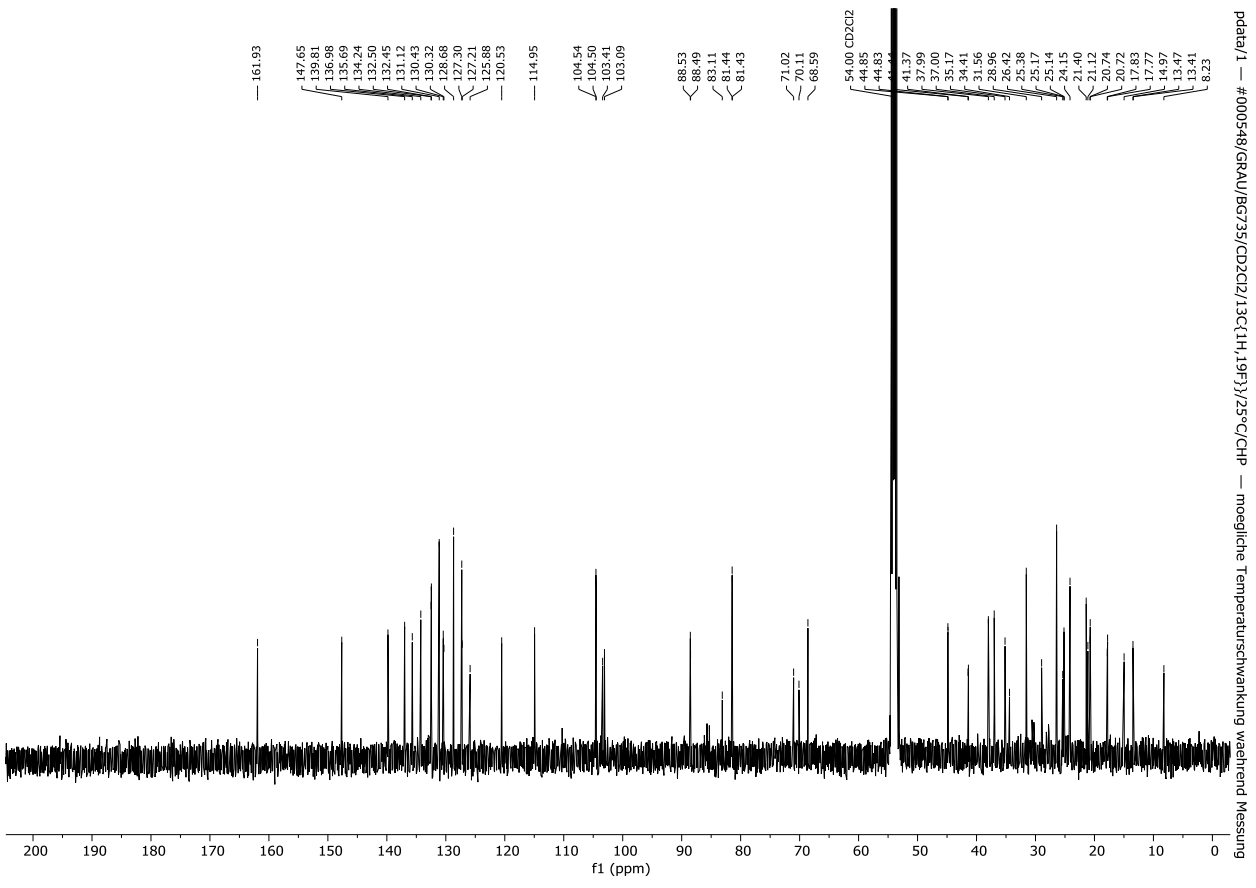

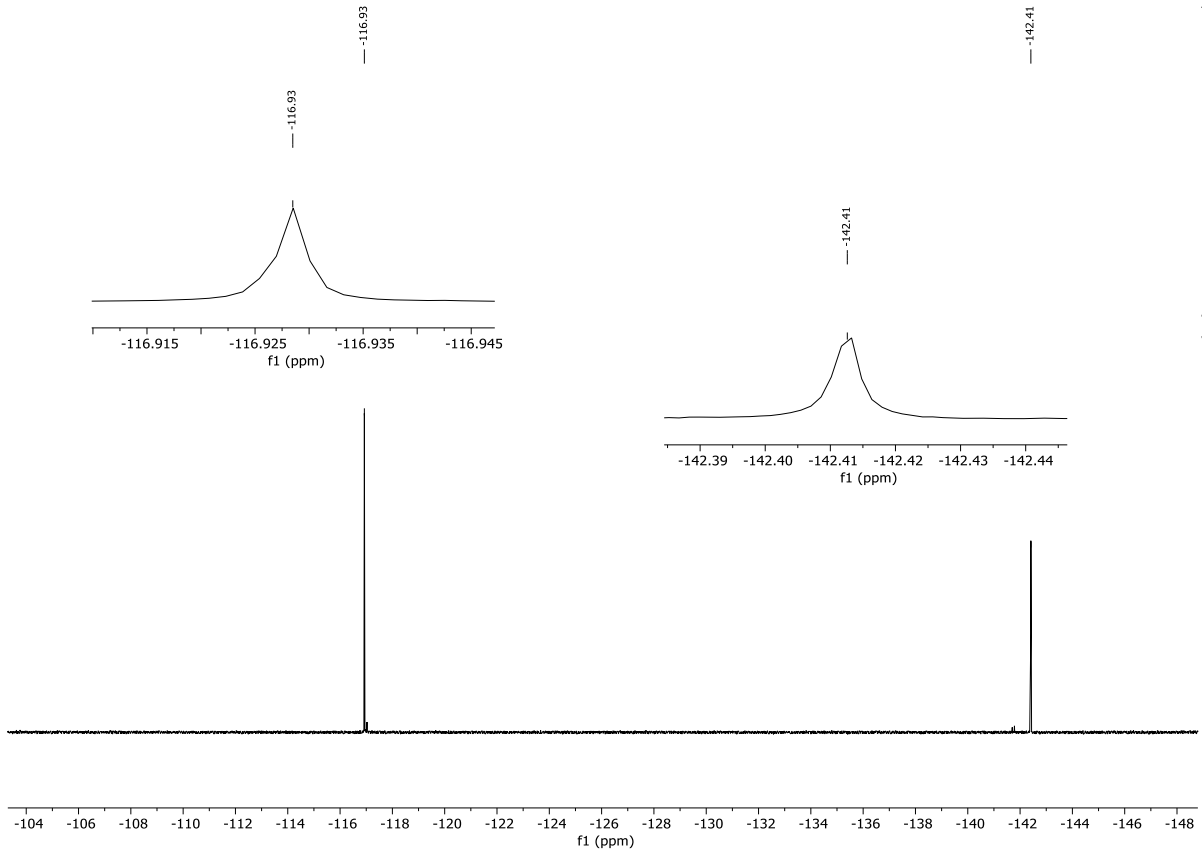



# $^1\text{H}$ , $^{13}\text{C}$ and $^{19}\text{F}$ -NMR-spectra of 16 in $\text{CD}_2\text{Cl}_2$

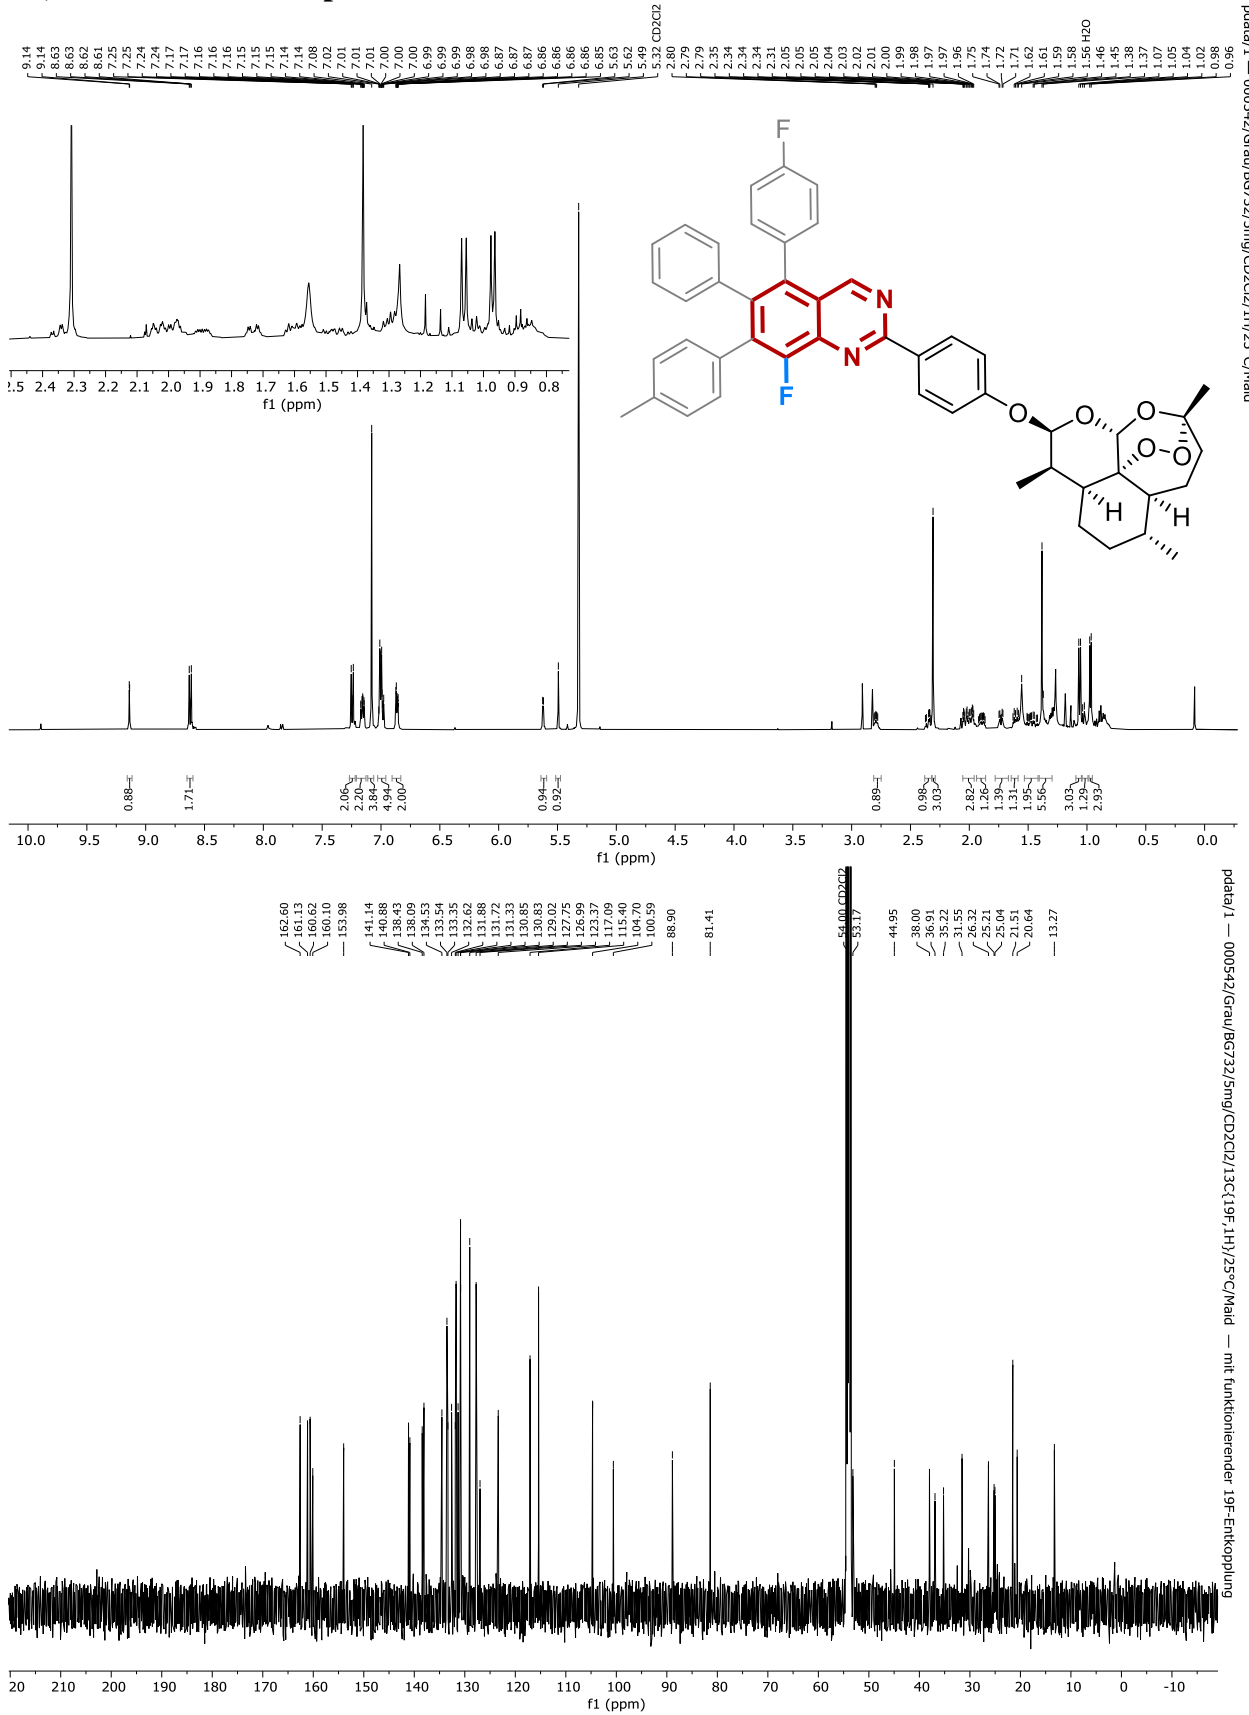

pdata/1 — 000542/Grau/BG732/5mg/CD2Cl2/1H/25°C/Mald

pdata/1 — 000542/Grau/BG732/5mg/CD2Cl2/13C(19F,1H)/25°C/Mald — mit funktioneller 19F-Entkopplung

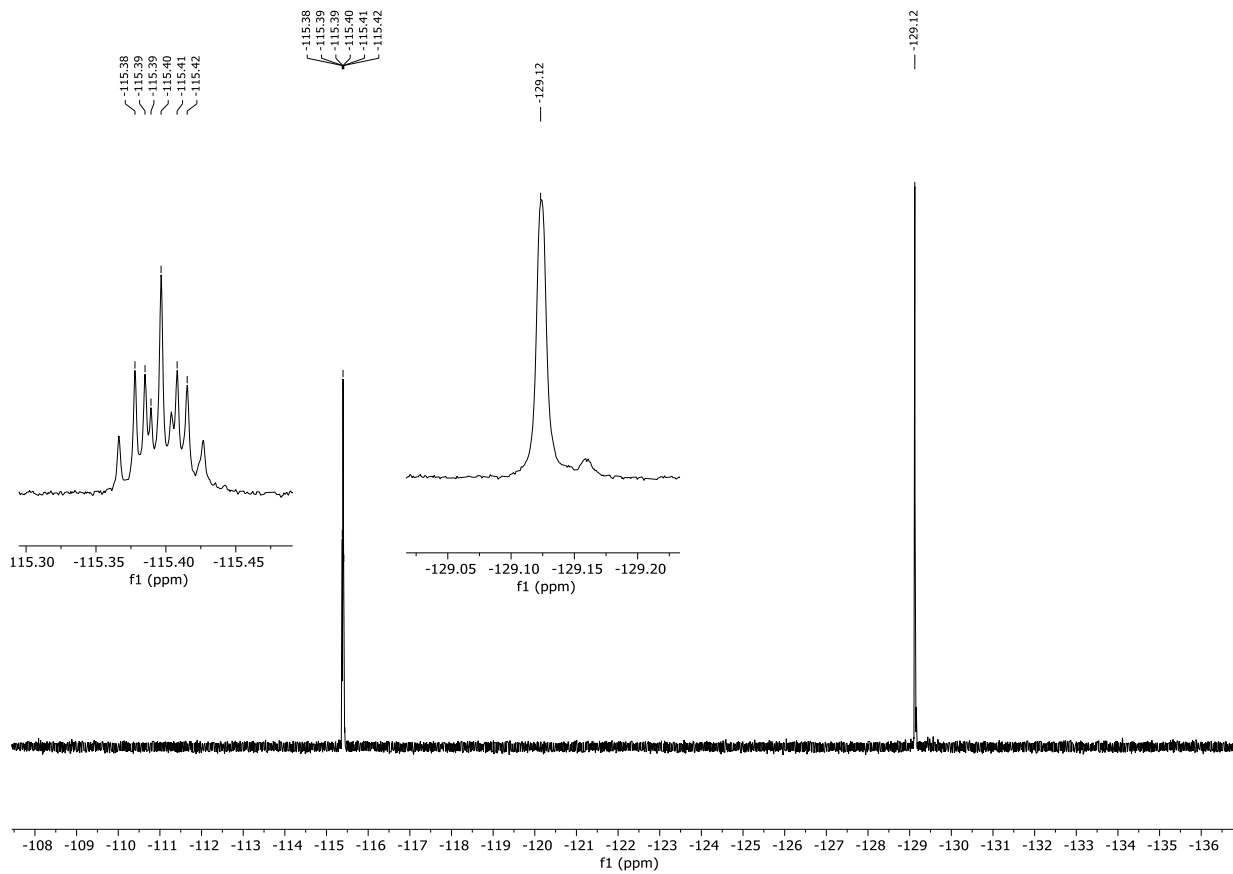

**<sup>1</sup>H, <sup>13</sup>C and <sup>19</sup>F-NMR-spectra of 17 in acetone-d<sub>6</sub>**

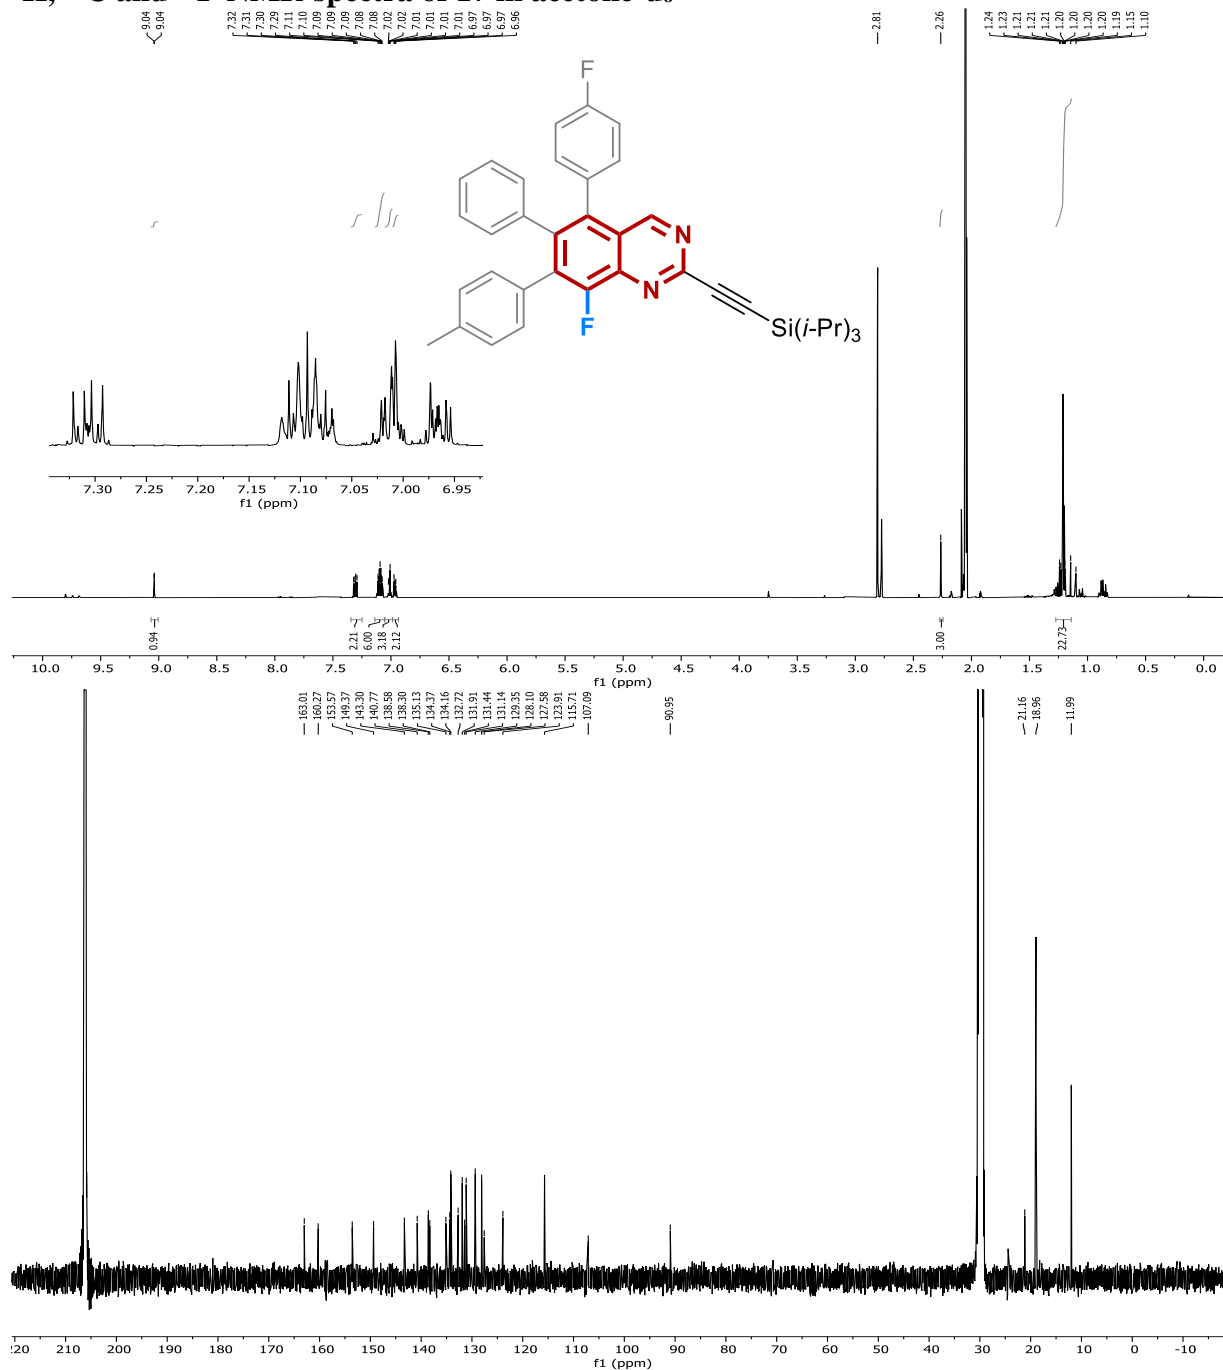

S59000706.3.1.1f - #000706/GRAU/BS800/Aceton/1H/25/C/CHP

S59000706.2.1.1f - #000706/GRAU/BS800/Aceton/13C(19F-1H)/25/C/CHP

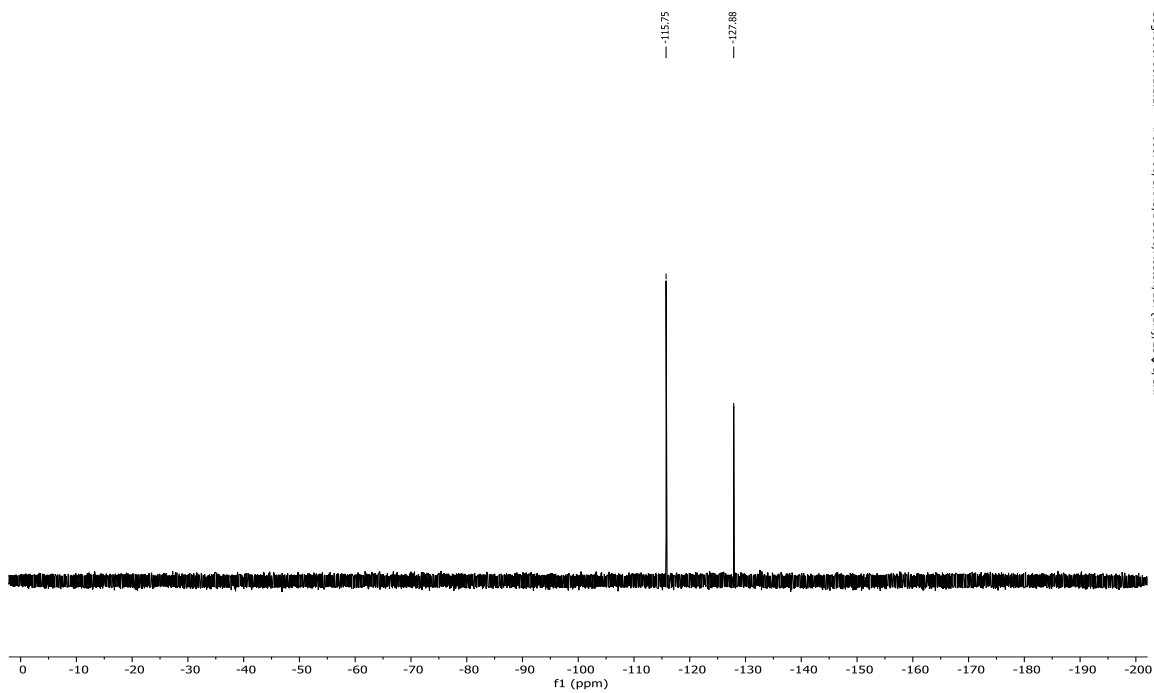

**$^1\text{H}$ ,  $^{13}\text{C}$  and  $^{19}\text{F}$ -NMR-spectra of 18 in  $\text{CD}_2\text{Cl}_2$**

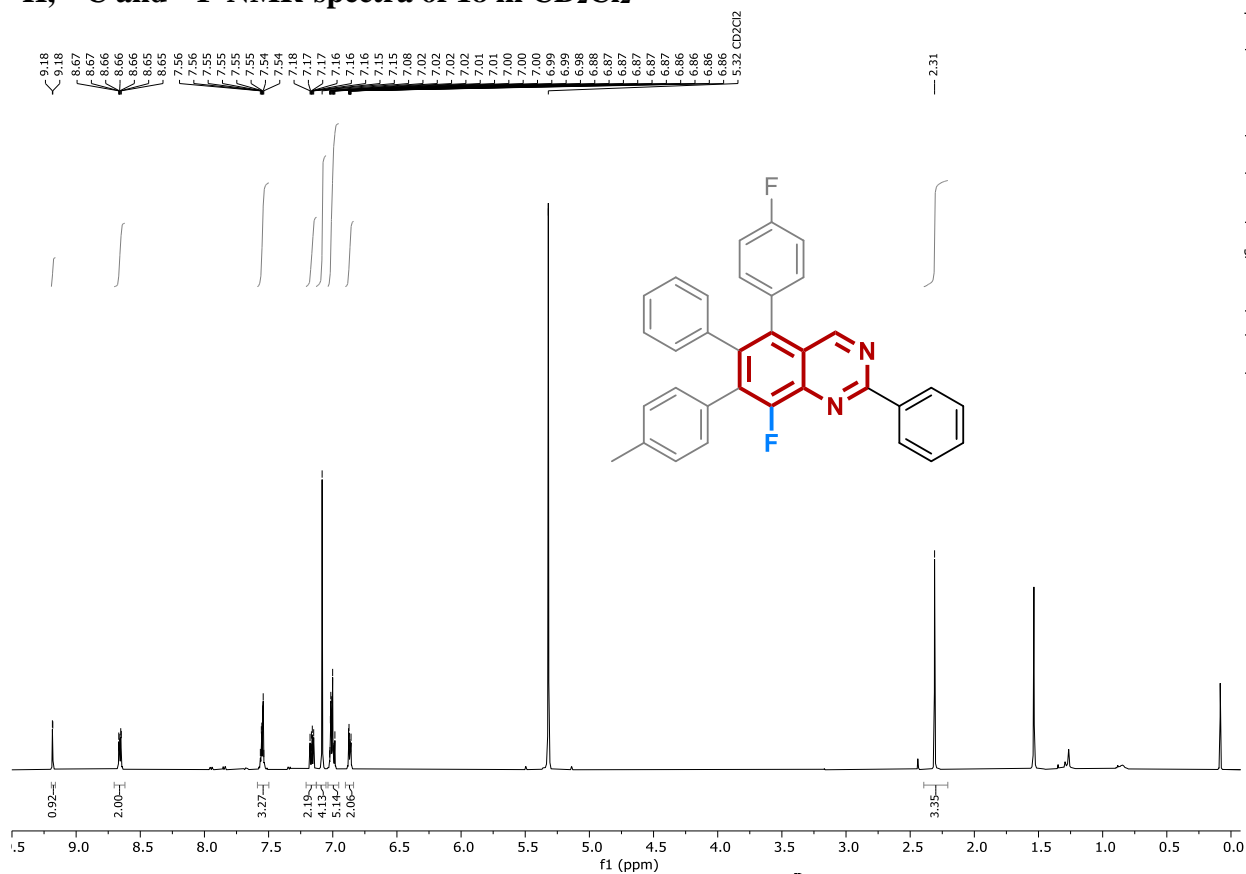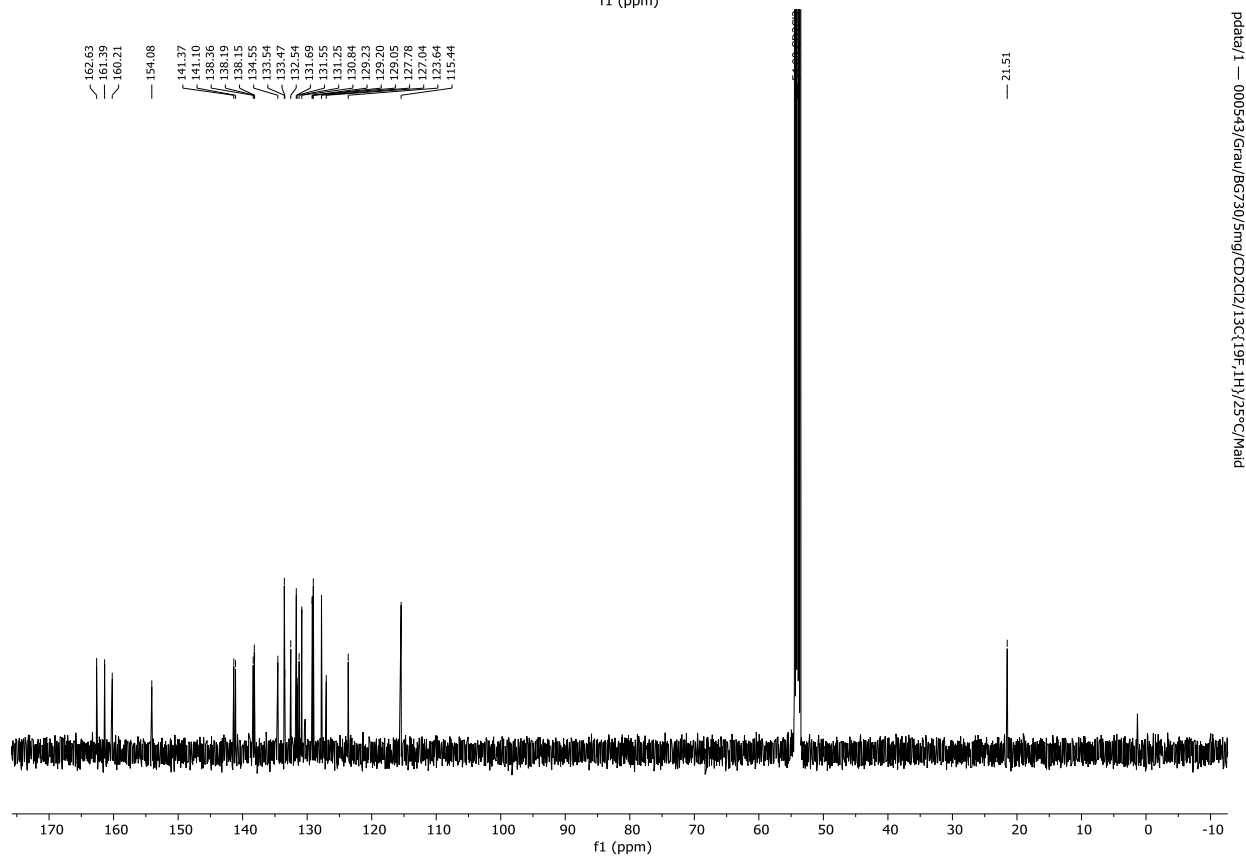

pdata/1 — 000543/Grau/BG730/5mg/CD2Cl2/1H/25°C/Mald

pdata/1 — 000543/Grau/BG730/5mg/CD2Cl2/13C/19F/1H/25°C/Mald

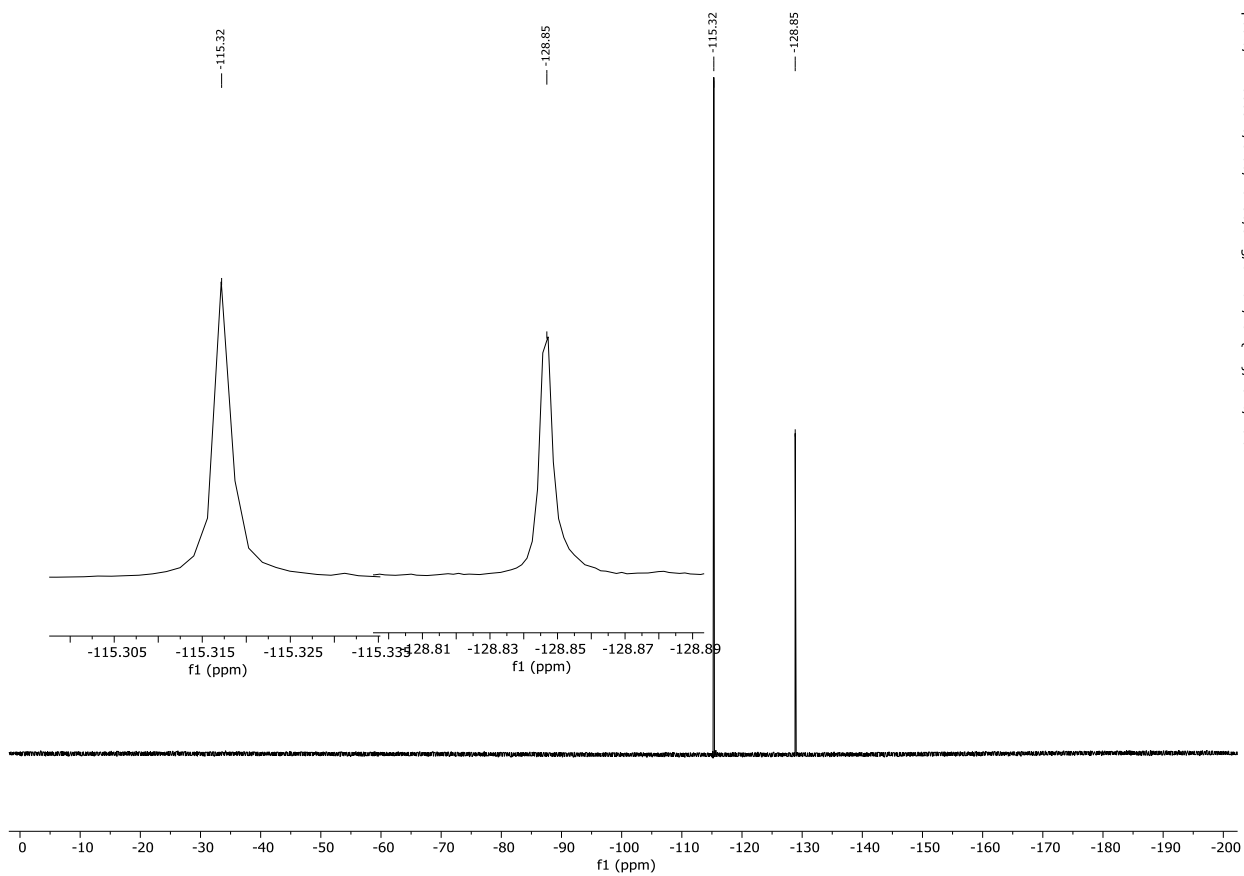

plate11 — 000543/Grau/BG730/5mg/CDCl2/19F{1H}/25°C/maid

## X-ray crystallography of 5n

### Crystal Data and Experimental

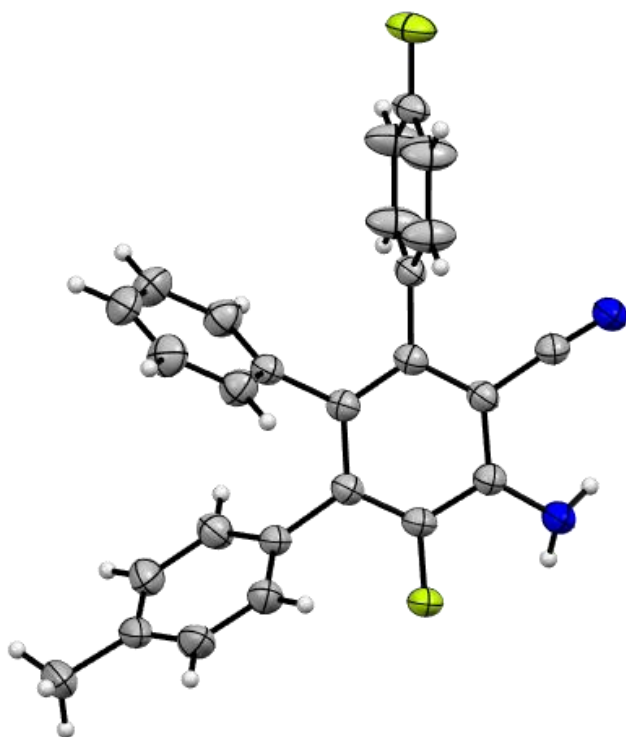

**Experimental.** Single clear light colourless needle crystals of **20Tso\_BG04** recrystallised from a mixture of MeOH and DCM by solvent layering. A suitable crystal with dimensions  $0.47 \times 0.12 \times 0.09 \text{ mm}^3$  was selected and mounted on a mylar loop in perfluoroether oil on a SuperNova, Dual, Cu at home/near, Atlas diffractometer. The crystal was kept at a steady  $T = 152.8(9) \text{ K}$  during data collection. The structure was solved with the ShelXT (Sheldrick, 2015) solution program using dual methods and by using Olex2 (Dolomanov et al., 2009) as the graphical interface. The model was refined with ShelXL 2018/3 (Sheldrick, 2015) using full matrix least squares minimisation on  $F^2$ .

**CCDC 2109016** contains the supplementary crystallographic data for this paper. These data can be obtained free of charge from The Cambridge Crystallographic Data Centre via [www.ccdc.cam.ac.uk/data\\_request/cif](http://www.ccdc.cam.ac.uk/data_request/cif).

**Crystal Data.**  $\text{C}_{26}\text{H}_{18}\text{F}_2\text{N}_2$ ,  $M_r = 396.42$ , monoclinic,  $C2/c$  (No. 15),  $a = 26.4195(6) \text{ \AA}$ ,  $b = 6.4278(2) \text{ \AA}$ ,  $c = 24.1425(6) \text{ \AA}$ ,  $b = 92.372(2)^\circ$ ,  $a = g = 90^\circ$ ,  $V = 4096.35(19) \text{ \AA}^3$ ,  $T = 152.8(9) \text{ K}$ ,  $Z = 8$ ,  $Z' = 1$ ,  $m(\text{Cu K}\alpha) = 0.721$ , 19202 reflections measured, 3792 unique ( $R_{\text{int}} = 0.0280$ ) which were used in all calculations. The final  $wR_2$  was 0.1284 (all data) and  $R_1$  was 0.0439 ( $I \geq 2 \sigma(I)$ ).

| Compound                              | 20Tso_BG04                                       |
|---------------------------------------|--------------------------------------------------|
| Formula                               | $\text{C}_{26}\text{H}_{18}\text{F}_2\text{N}_2$ |
| $D_{\text{calc.}} / \text{g cm}^{-3}$ | 1.286                                            |
| $m / \text{mm}^{-1}$                  | 0.721                                            |
| Formula Weight                        | 396.42                                           |
| Colour                                | clear light colourless                           |
| Shape                                 | needle                                           |
| Size/ $\text{mm}^3$                   | $0.47 \times 0.12 \times 0.09$                   |
| $T / \text{K}$                        | 152.8(9)                                         |
| Crystal System                        | monoclinic                                       |
| Space Group                           | $C2/c$                                           |
| $a / \text{ \AA}$                     | 26.4195(6)                                       |
| $b / \text{ \AA}$                     | 6.4278(2)                                        |
| $c / \text{ \AA}$                     | 24.1425(6)                                       |
| $a^\circ$                             | 90                                               |
| $b^\circ$                             | 92.372(2)                                        |
| $g^\circ$                             | 90                                               |
| $V / \text{ \AA}^3$                   | 4096.35(19)                                      |
| $Z$                                   | 8                                                |
| $Z'$                                  | 1                                                |
| Wavelength/ $\text{ \AA}$             | 1.54184                                          |
| Radiation type                        | Cu $K_\alpha$                                    |
| $Q_{\text{min}}^\circ$                | 3.349                                            |
| $Q_{\text{max}}^\circ$                | 69.363                                           |
| Measured Refl's.                      | 19202                                            |
| Indep't Refl's                        | 3792                                             |
| Refl's $I \geq 2 \sigma(I)$           | 3288                                             |
| $R_{\text{int}}$                      | 0.0280                                           |
| Parameters                            | 274                                              |
| Restraints                            | 0                                                |
| Largest Peak                          | 0.422                                            |
| Deepest Hole                          | -0.378                                           |
| GooF                                  | 1.054                                            |
| $wR_2$ (all data)                     | 0.1284                                           |
| $wR_2$                                | 0.1219                                           |
| $R_1$ (all data)                      | 0.0507                                           |
| $R_1$                                 | 0.0439                                           |

A clear light colourless needle-shaped crystal with dimensions  $0.47 \times 0.12 \times 0.09 \text{ mm}^3$  was mounted on a mylar loop in perfluoroether oil. Data were collected using a SuperNova, Dual, Cu at home/near, Atlas diffractometer equipped with a Cryojet - Oxford Instruments low-temperature device operating at  $T = 152.8(9) \text{ K}$ .

Data were measured using  $\omega$  scans using Cu  $K_\alpha$  radiation. The diffraction pattern was indexed and the total number of runs and images was based on the strategy calculation from the program CrysAlisPro (Rigaku, V1.171.40.67a, 2019). The maximum resolution that was achieved was  $Q = 69.363^\circ$  ( $0.82 \text{ \AA}$ ).

The diffraction pattern was indexed and the total number of runs and images was based on the strategy calculation from the program CrysAlisPro (Rigaku, V1.171.40.67a, 2019). The unit cell was refined using CrysAlisPro (Rigaku, V1.171.40.67a, 2019) on 8748 reflections, 46% of the observed reflections.

Data reduction, scaling and absorption corrections were performed using CrysAlisPro (Rigaku, V1.171.40.67a, 2019). The final completeness is 99.70 % out to  $69.363^\circ$  in  $Q$ . A gaussian absorption correction was performed using CrysAlisPro 1.171.40.67a (Rigaku Oxford Diffraction, 2019) Numerical absorption correction based on gaussian integration over a multifaceted crystal model Empirical absorption correction using spherical harmonics, implemented in SCALE3 ABSPACK scaling algorithm. The absorption coefficient  $m$  of this material is  $0.721 \text{ mm}^{-1}$  at this wavelength ( $\lambda = 1.54184 \text{ \AA}$ ) and the minimum and maximum transmissions are 0.604 and 1.000.

The structure was solved, and the space group  $C2/c$  (# 15) determined by the ShelXT (Sheldrick, 2015) structure solution program using dual methods and refined by full matrix least squares minimisation on  $F^2$  using version 2018/3 of ShelXL 2018/3 (Sheldrick, 2015). All non-hydrogen atoms were refined anisotropically. Hydrogen atom positions were calculated geometrically and refined using the riding model. Hydrogen atom positions were calculated geometrically and refined using the riding model.

*\_exptl\_absorpt\_process\_details*: CrysAlisPro 1.171.40.67a (Rigaku Oxford Diffraction, 2019) Numerical absorption correction based on gaussian integration over a multifaceted crystal model Empirical absorption correction using spherical harmonics as implemented in SCALE3 ABSPACK.

There is a single molecule in the asymmetric unit, which is represented by the reported sum formula. In other words: Z is 8 and Z' is 1.



## **Biological Methodology**

### *HCMV GFP-based replication model in primary fibroblasts and antiviral drug analysis*

HCMV replication was analyzed in 96-well cell culture plates using quadruplicate determinations as described earlier<sup>[34c]</sup>. To this end, 13,500 primary human fibroblasts (HFFs) were seeded per well, infected with HCMV AD169-GFP<sup>[34d]</sup> at MOI of 0.001 (referring to a maximum 25% GFP-positive cells at 7 days) and treated with serial dilutions of antiviral compounds. At 7 days post infection (d p.i.), HFFs were fixed with 10% formalin for 20 min at 4 °C and replication was quantified by measurement of the intracellular GFP fluorescence in a Victor X4 Plate Reader (PerkinElmer, Waltham, MA, USA). Antiviral activity was defined as the compound-induced reduction of viral replication relative to the solvent control. To assess putative drug-induced cytotoxicity, HFFs were cultivated in 96-well plates and treated with serial dilutions of antiviral compounds for 7 d. At the time point of measurement, cells were incubated with a final concentration of 40 µg/ml Neutral Red (NR) solution (Sigma-Aldrich) at 37 °C for 4 h to allow uptake of NR. Subsequently, cells were washed with PBS and the incorporated NR was released by destain solution (50% ethanol, 1% acetic acid and 49% H<sub>2</sub>O) for subsequent quantitation of the NR fluorescence (560/630 nm) in a Victor X4 Plate Reader as indicator of cell viability<sup>[34e]</sup>. The 50% effective antiviral (EC<sub>50</sub>) and 50% cytotoxic concentrations (CC<sub>50</sub>) were determined by fitting two parameter logistic dose-response curves to the experimentally determined values.

## UV/Vis Spectra

UV/Vis measurements were carried out on an Agilent Technologies Cary 60 UV/Vis-NIR spectrophotometer at rt. Fluorescence measurements were carried out on an Agilent Technologies Cary Eclipse Fluorescence Spectrometer. All measurements were performed in precision cells SUPRASIL made of quartz from HELLMMA Analytics with a layer thickness of  $d = 1$  cm and maximum filling volume of 3500  $\mu\text{L}$ . Before each measurement a baseline correction with the corresponding solvent filled cuvettes was performed.

### *Spectra of Quinazolines*

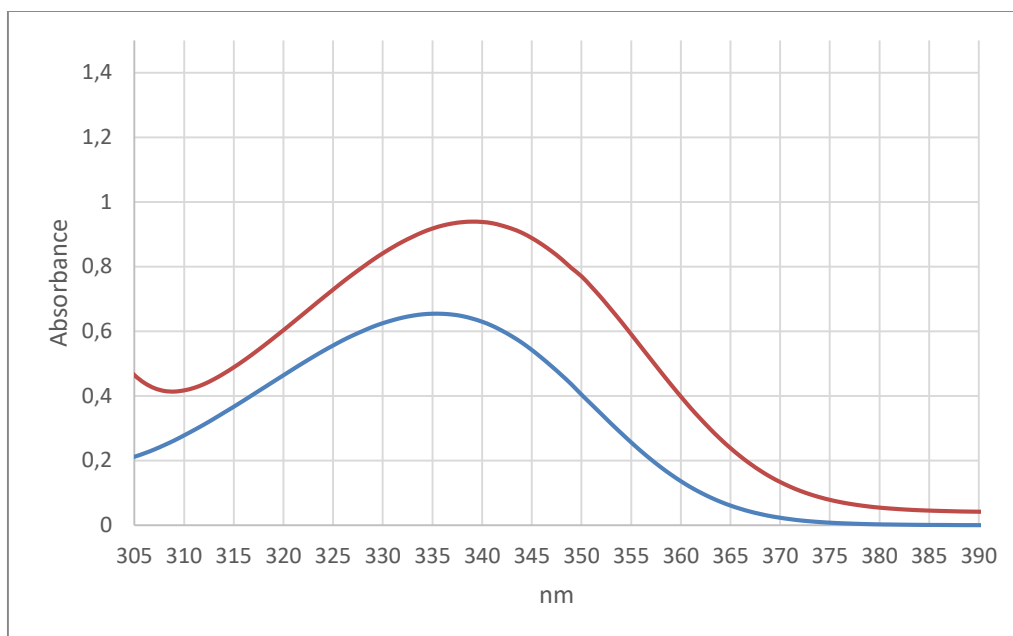

**Figure S1.** UV/Vis spectra of **3j** (red) and **5n** (blue)

The UV/Vis measurements show absorption maxima of **5n** at 335 nm and that of **3j** at 340 nm. *Meta*-terphenyl **3j** shows the greatest absorbance at similar concentrations.

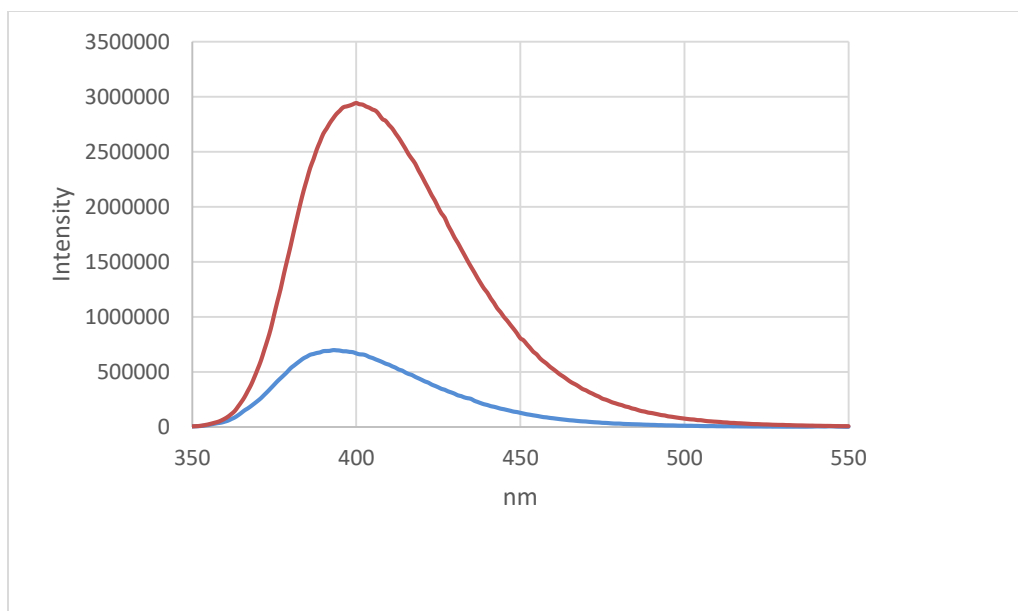

**Figure S2.** Fluorescence spectra of **3j** (red) and **5n** (blue)

*Meta*-terphenyl **3j** shows a fluorescence maximum at 400 nm, whereas **5n** shows a maximum at 395 nm. The absorption maxima from *meta*-terphenyl **3j** is greater than that of **5n** at similar concentrations. This can also be observed by looking at samples of the compounds in solution under an UV lamp. No notable solvatochromatic effect could be observed by changing the solvent from DCM to toluene or MeCN.

*Spectra of azo dye 12*

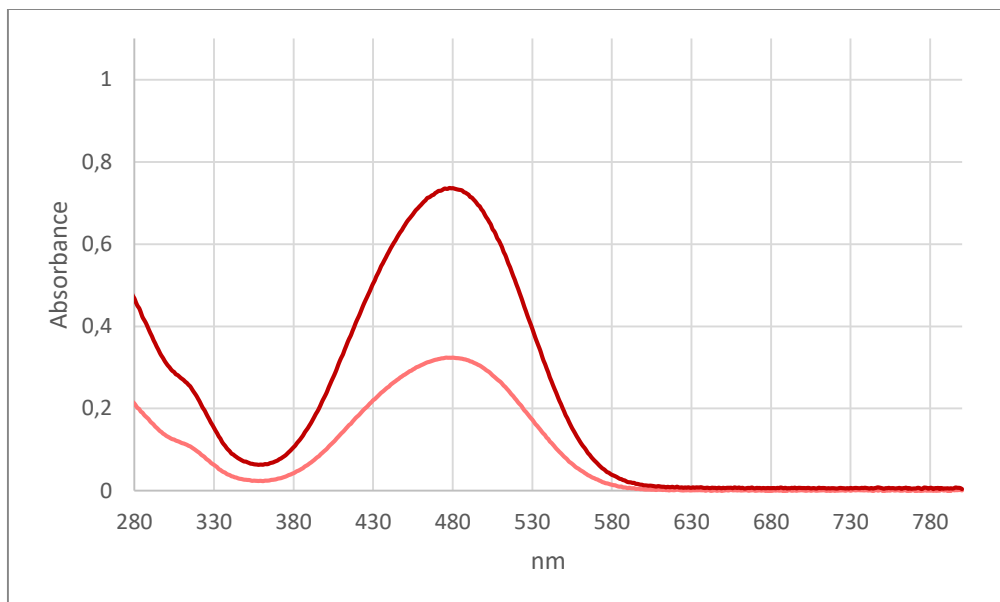

**Figure S3.** UV/Vis spectra of **12** with the concentration of  $6 \cdot 10^{-5}$  M (dark red) and  $3 \cdot 10^{-5}$  M (light red)

UV/Vis spectra of azo dye **12** in spectral grade DMSO are shown above. It exhibits absorption in the blue & green light range, explaining the red color of the compound. The maximum absorption was measured to be at a wavelength of 478 nm.

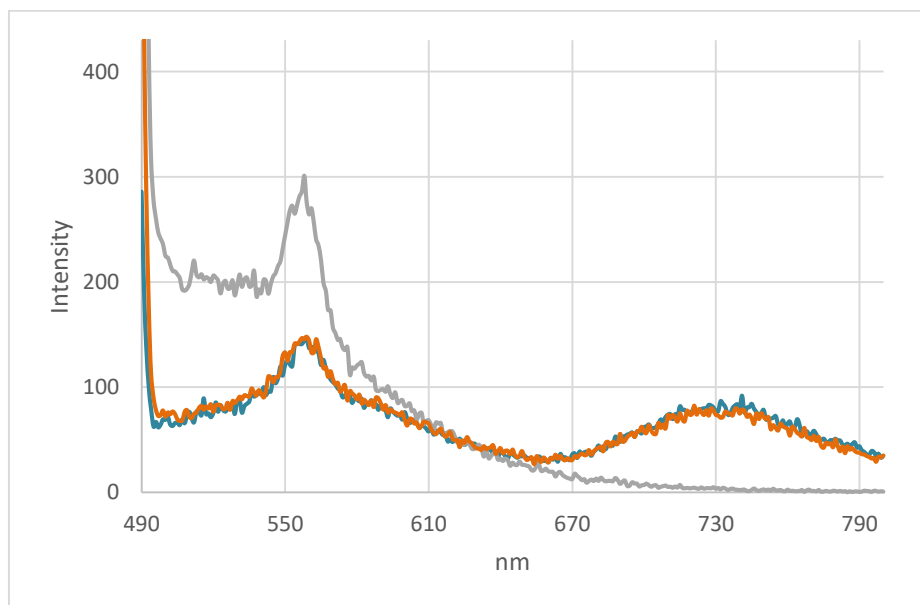

**Figure S3.** Fluorescence spectra of **12** with conc. of  $6 \cdot 10^{-5}$  M (orange & blue) versus pure DMSO (grey)

The measurement was conducted in spectral grade DMSO at a concentration of  $6 \cdot 10^{-5}$  M. Measurements with a standard slit width of 5 showed no signal, hence the measurement was performed at a slit width of 10. The chosen excitation wavelength was 478 nm. Two peaks are visible in the spectrum. The left peak is strongest in the blank measurement, indicating it not being emission of **12**, but from a solvent effect, which diminishes with addition of **12**. The right peak with a maximum at around 730 nm is only seen with **12**. We cannot be sure, if this is fluorescence or another effect. There could be conglomeration of our molecules or heat radiation from **12**. Overall the signal strength is very weak, indicating no significant fluorescence of azo dye **12**.

### **Cyclic voltammetry**

Cyclic voltammetry measurements were conducted with a Metrohm Autolab PGSTAT204 potentiostat and Nova 2.1 software. For all experiments a glassy carbon or a platinum working electrode (disk, diameter: 3 mm), a platinum wire counter electrode and a SCE-electrode was used as the reference electrode. Dichloromethane with 0.1 mol/L n-Bu<sub>4</sub>NPF<sub>6</sub> as conducting salt served as electrolyte for the measurements. The voltammograms were recorded at a scan rate of 100 mV/s, if not indicated otherwise.

## References

- [4d] A. S. Aldoshin, A. A. Tabolin, S. L. Ioffe, V. G. Nenajdenko, *Eur. J. Org. Chem.*, **2018**, 2018, 3816-3825.
- [23c] B. W. Grau, M. Dill, F. Hampel, A. Kahnt, N. Jux, S. B. Tsogoeva, *Angew. Chem. Int. Ed.*, **2021**, 60, 22307-22314.
- [25] T. Yamaguchi, Y. Sugiura, E. Yamaguchi, N. Tada, A. Itoh, *Asian J. Org. Chem.*, **2017**, 6, 432-435.
- [34] a) Y.-X. Chen, J.-T. He, M.-C. Wu, Z.-L. Liu, K. Tang, P.-J. Xia, K. Chen, H.-Y. Xiang, X.-Q. Chen, H. Yang, *Org. Lett.*, **2022**, 24, 3920-3925; b) D. M. Barnes, A. R. Haight, T. Hameury, M. A. McLaughlin, J. Mei, J. S. Tedrow, J. D. Riva Toma, *Tetrahedron*, **2006**, 62, 11311-11319; c) C. Wangen, A. Raithel, J. Tillmanns, C. Gege, A. Herrmann, D. Vitt, H. Kohlhof, M. Marschall, F. Hahn, *Antivir. Res.*, **2024**, 221, 105769; d) M. Marschall, M. Freitag, S. Weiler, G. Sorg, T. Stamminger, *Antimicrob. Agents Chemother.*, **2000**, 44, 1588-1597; e) G. Repetto, A. del Peso, J. L. Zurita, *Nat. Protoc.*, **2008**, 3, 1125-1131.
